# Supplementary material for: N6-methyladenosine in DNA promotes genome stability
Source: bioRxiv preprint, doi:10.1101/2024.07.20.604187, version 2 (2025-01-09)
Supplement: Supplemental Table 1 [file 604187_file03.xlsx]

## Sheet: Sheet1
Gene	-log2(fold change)	-log10(p-value)	Library Subpool
44260	-1.3473	5.30544	A
A3GALT2	0.037413	0.299391	A
A4GALT	0.22723	1.69562	A
A4GNT	0.048358	0.21371	A
AACS	0.064209	0.259606	A
AADAC	0.18025	1.01959	A
AADACL2	0.06761	0.266963	A
AADACL3	0.16115	0.790003	A
AADACL4	-0.12599	0.922959	A
AADAT	0.012419	0.473247	A
AAK1	0.093208	0.375914	A
AANAT	-0.02731	0.437101	A
AASDH	0.47924	3.93622	A
AASDHPPT	-0.126	0.811072	A
AASS	0.12354	0.541347	A
AATK	0.053251	0.359002	A
AAVS1	-0.10524	0.726258	A
ABAT	0.002289	0.285528	A
ABCA1	0.1019	0.315613	A
ABCA10	0.00873	0.063531	A
ABCA12	-0.01485	0.394221	A
ABCA13	0.10837	0.333913	A
ABCA2	-0.0407	0.152267	A
ABCA3	0.008612	0.050649	A
ABCA4	-0.02064	0.246746	A
ABCA5	0.12973	0.500725	A
ABCA6	0.022653	0.322229	A
ABCA7	-0.07696	0.149072	A
ABCA8	-0.01295	0.090663	A
ABCA9	-0.05189	0.092992	A
ABCB1	-0.14535	0.747244	A
ABCB10	0.007471	0.297992	A
ABCB11	0.012284	0.198576	A
ABCB4	-0.11943	0.570684	A
ABCB5	-0.09599	0.527887	A
ABCB6	0.12594	0.488478	A
ABCB7	0.65522	2.33166	A
ABCB8	0.01066	0.207847	A
ABCB9	0.030219	0.362831	A
ABCC1	-0.22943	1.29974	A
ABCC10	-0.15383	0.801838	A
ABCC11	-0.10758	0.458234	A
ABCC12	-0.0672	0.128229	A
ABCC2	-0.1822	1.07976	A
ABCC3	-0.29579	2.07351	A
ABCC4	-0.63952	6.00441	A
ABCC5	-0.01995	0.314733	A
ABCC6	-0.22714	1.1017	A
ABCC8	-0.01798	0.070591	A
ABCC9	-0.08355	0.122778	A
ABCD1	0.048231	0.346026	A
ABCD2	-0.04015	0.11391	A
ABCD3	-0.17487	1.01021	A
ABCD4	0.182	0.963172	A
ABCE1	0.45129	0.595354	A
ABCF1	0.95645	4.09592	A
ABCF2	-0.37108	1.9588	A
ABCF3	0.13135	0.619915	A
ABCG1	0.077564	0.370621	A
ABCG2	0.21696	1.06061	A
ABCG4	-0.23405	1.67524	A
ABCG5	0.20405	1.292	A
ABCG8	-0.00435	0.507687	A
ABHD1	-0.07462	0.320817	A
ABHD10	0.083222	0.871924	A
ABHD11	-0.14969	1.27161	A
ABHD12	0.13818	0.940437	A
ABHD14A	-0.03554	0.333819	A
ABHD14B	0.021158	0.24766	A
ABHD2	0.17823	0.880282	A
ABHD3	0.02713	0.293846	A
ABHD4	0.11557	0.518099	A
ABHD5	-0.02703	0.072892	A
ABHD6	0.020844	0.231362	A
ABHD8	0.065677	0.254426	A
ABL1	0.040524	0.060586	A
ABL2	0.009562	0.139662	A
ABO	0.065231	0.143289	A
ACAA1	0.0427	0.295952	A
ACAA2	0.16575	0.76374	A
ACACA	-0.21895	0.917322	A
ACACB	0.005748	0.113978	A
ACAD10	0.087367	0.597189	A
ACAD11	0.13138	0.7013	A
ACAD8	-0.16891	0.715321	A
ACAD9	0.43675	2.54426	A
ACADL	-0.13444	0.767309	A
ACADM	0.037414	0.358655	A
ACADS	-0.08486	0.467832	A
ACADSB	-0.08704	0.374852	A
ACADVL	-0.04844	0.484471	A
ACAT1	-0.19314	0.905459	A
ACAT2	0.12174	0.666573	A
ACCS	0.07341	0.346759	A
ACER1	0.014771	0.42143	A
ACER2	0.25644	1.47759	A
ACER3	0.009896	0.314778	A
ACHE	-0.04973	0.454582	A
ACKR1	-0.0037	0.108028	A
ACKR2	0.084458	0.386877	A
ACKR3	0.073045	0.144118	A
ACKR4	0.026566	0.553121	A
ACLY	0.54526	3.92885	A
ACMSD	-0.1952	1.21926	A
ACO1	0.27783	2.25305	A
ACO2	1.1637	6.00441	A
ACOT1	0.066333	0.32181	A
ACOT11	0.084012	0.439472	A
ACOT12	-0.03805	0.282354	A
ACOT13	-0.09363	0.270633	A
ACOT2	0.058585	0.407734	A
ACOT4	0.044044	0.157166	A
ACOT6	-0.01274	0.098596	A
ACOT7	0.08012	0.363683	A
ACOT8	0.060583	0.270641	A
ACOT9	0.002723	0.436804	A
ACOX1	-0.0599	0.404427	A
ACOX2	0.063687	0.11491	A
ACOX3	0.038379	0.176109	A
ACOXL	-0.09125	0.147825	A
ACR	-0.04313	0.187414	A
ACSBG1	-0.107	0.972487	A
ACSBG2	0.025501	0.19214	A
ACSF2	-0.05935	0.620713	A
ACSF3	-0.05829	0.63848	A
ACSL1	0.03954	0.237164	A
ACSL3	-0.12059	0.55396	A
ACSL4	-0.06116	0.306255	A
ACSL5	0.11794	0.422991	A
ACSL6	-0.09216	0.464947	A
ACSM1	-0.201	1.26103	A
ACSM2A	-0.00034	0.10795	A
ACSM2B	-0.12382	0.373085	A
ACSM3	-0.0831	0.349003	A
ACSM4	-0.07513	0.380239	A
ACSM5	-0.10019	0.356123	A
ACSS1	0.11326	0.780809	A
ACSS2	0.042661	0.111281	A
ACSS3	0.16689	0.542618	A
ACTC1	-0.21181	1.37372	A
ACTL6B	0.088791	0.348179	A
ACVR1	-0.05166	0.424743	A
ACVR1B	0.1282	0.857548	A
ACVR1C	-0.1346	0.389627	A
ACVR2A	-0.33212	1.48668	A
ACVR2B	-0.00907	0.075917	A
ACVRL1	0.14803	0.771805	A
ACY1	-0.0243	0.220598	A
ACY3	-0.17202	0.789494	A
ACYP1	0.23303	1.27088	A
ACYP2	-0.12407	0.351904	A
ADA	0.11377	0.581865	A
ADA2	0.248	1.20088	A
ADAD1	0.092337	0.290883	A
ADAD2	0.079229	0.412626	A
ADAL	-0.48888	2.77014	A
ADAM10	-0.45676	1.99952	A
ADAM11	-0.06201	0.316809	A
ADAM12	0.083883	1.08194	A
ADAM15	0.19601	0.872377	A
ADAM17	0.24432	1.97704	A
ADAM18	0.066626	0.213064	A
ADAM19	-0.03396	0.494321	A
ADAM2	0.014094	0.221863	A
ADAM20	0.026764	0.261283	A
ADAM21	0.088516	0.322457	A
ADAM22	-0.19839	1.93798	A
ADAM23	-0.03646	0.106044	A
ADAM28	-0.03507	0.10868	A
ADAM29	0.011387	0.425251	A
ADAM30	0.14164	0.6674	A
ADAM32	0.043138	0.107744	A
ADAM33	0.00634	0.15789	A
ADAM7	0.091937	0.462584	A
ADAM8	-0.08188	0.609153	A
ADAM9	0.093212	0.449747	A
ADAMDEC1	0.18536	1.15263	A
ADAMTS1	-0.06585	0.408702	A
ADAMTS10	0.027736	0.782437	A
ADAMTS12	0.061216	0.283454	A
ADAMTS13	0.14206	0.909425	A
ADAMTS14	0.10275	0.416711	A
ADAMTS15	0.032262	0.491457	A
ADAMTS16	0.031129	0.060331	A
ADAMTS17	-0.17591	0.606952	A
ADAMTS18	0.27293	1.4812	A
ADAMTS19	-0.215	1.14332	A
ADAMTS2	-0.10909	0.448989	A
ADAMTS20	0.27622	1.44003	A
ADAMTS3	0.28472	1.97265	A
ADAMTS4	0.064799	0.223183	A
ADAMTS5	0.10118	0.447892	A
ADAMTS6	0.063848	0.313248	A
ADAMTS7	0.022388	0.182693	A
ADAMTS8	0.13542	0.480894	A
ADAMTS9	0.042898	0.133724	A
ADAR	-0.68811	1.91108	A
ADARB1	-0.02435	0.270471	A
ADARB2	0.029764	0.061921	A
ADAT1	0.24352	1.29773	A
ADAT2	-0.22188	1.19456	A
ADCK1	0.10799	0.585561	A
ADCK2	-0.02256	0.193257	A
ADCK5	-0.11981	0.581251	A
ADCY1	-0.00074	0.163771	A
ADCY10	-0.02702	0.08489	A
ADCY2	0.048755	0.685817	A
ADCY3	0.067383	0.089648	A
ADCY4	-0.07646	0.476423	A
ADCY5	0.064386	0.477321	A
ADCY6	-0.03241	0.125089	A
ADCY7	0.01915	0.171824	A
ADCY8	0.011164	0.074533	A
ADCY9	-0.10521	0.549782	A
ADCYAP1R1	0.051278	0.37611	A
ADGRA1	0.036814	0.546513	A
ADGRA2	-0.12513	0.524707	A
ADGRA3	0.011409	0.43816	A
ADGRB1	-0.13515	0.803907	A
ADGRB2	0.10156	0.277481	A
ADGRB3	-0.1105	0.546865	A
ADGRD1	0.030994	0.106255	A
ADGRD2	0.021397	0.468151	A
ADGRE1	0.004786	0.073678	A
ADGRE2	0.19749	1.32698	A
ADGRE3	0.15858	1.65449	A
ADGRE5	0.12351	0.676624	A
ADGRF1	-0.28083	1.94203	A
ADGRF2	-0.35148	2.27549	A
ADGRF3	-0.04295	0.083983	A
ADGRF4	-0.1931	0.784336	A
ADGRF5	-0.115	0.637404	A
ADGRG1	-0.42318	2.71684	A
ADGRG2	-0.01419	0.170208	A
ADGRG3	-0.13568	0.898906	A
ADGRG4	0.053181	0.166298	A
ADGRG5	-0.0642	0.246126	A
ADGRG6	-0.15917	0.92024	A
ADGRG7	0.41354	2.8962	A
ADGRL1	0.058982	0.175139	A
ADGRL2	0.031108	0.039705	A
ADGRL3	0.14264	0.832122	A
ADGRL4	0.10587	0.450984	A
ADGRV1	0.17929	0.734145	A
ADH1A	0.05287	0.74177	A
ADH1B	0.047138	0.419737	A
ADH1C	0.010567	0.584242	A
ADH4	0.12527	0.719809	A
ADH5	0.12762	0.658843	A
ADH6	0.13799	0.776063	A
ADH7	0.068961	0.083104	A
ADHFE1	0.17389	0.661165	A
ADI1	-0.08657	0.460924	A
ADIPOR1	-0.03351	0.814855	A
ADIPOR2	0.026432	0.342437	A
ADK	0.1949	0.875724	A
ADO	0.057567	0.550923	A
ADORA1	0.078052	0.287519	A
ADORA2A	0.065937	0.392802	A
ADORA2B	0.16231	0.825068	A
ADORA3	0.047761	0.1636	A
ADPGK	-0.03919	0.201474	A
ADPRH	0.23042	0.997273	A
ADPRHL1	-0.03547	0.15471	A
ADPRHL2	0.015501	0.350023	A
ADRA1A	0.1128	0.859492	A
ADRA1B	0.11939	0.472615	A
ADRA1D	0.15362	0.788372	A
ADRA2A	0.012402	0.111489	A
ADRA2B	-0.09153	0.533488	A
ADRA2C	0.063542	0.549397	A
ADRB1	-0.11301	0.804543	A
ADRB2	-0.06738	0.311322	A
ADRB3	-0.05799	0.254426	A
ADSL	0.29336	1.45192	A
ADSS	0.67668	3.81409	A
ADSSL1	0.009175	0.129713	A
AEBP1	-0.04329	0.255793	A
AEBP2	-0.02026	0.475176	A
AEN	0.082605	0.11685	A
AFG3L2	0.37302	0.783623	A
AFMID	0.13187	0.493779	A
AGA	-0.01345	0.279287	A
AGBL2	0.28323	1.548	A
AGK	-0.02428	0.141324	A
AGL	-0.14649	0.784072	A
AGMAT	0.13126	0.494213	A
AGMO	0.012854	0.056713	A
AGPAT1	-0.17026	0.899044	A
AGPAT2	-0.00372	0.745839	A
AGPAT3	0.016411	0.098384	A
AGPAT4	0.054968	0.112163	A
AGPAT5	0.13414	1.10229	A
AGPS	-0.02228	0.139045	A
AGR2	-0.08813	0.141192	A
AGR3	-0.35932	2.37084	A
AGTPBP1	0.25485	1.48945	A
AGTR1	0.081239	0.712221	A
AGTR2	0.078461	0.392384	A
AGXT	0.059115	0.382224	A
AGXT2	-0.21238	0.756739	A
AHCY	0.67228	6.00441	A
AHCYL1	0.2913	0.895342	A
AHCYL2	0.30063	1.77619	A
AICDA	0.011472	0.31626	A
AIFM1	0.38571	3.15254	A
AIFM2	0.16445	0.992764	A
AIFM3	-0.17679	0.86509	A
AIRE	0.086061	0.404658	A
AK1	0.10848	0.38446	A
AK2	0.10533	0.54374	A
AK3	-0.04018	0.520799	A
AK4	0.059696	0.383021	A
AK5	0.026716	0.178408	A
AK6	0.073575	0.467182	A
AK7	0.081202	0.441916	A
AK8	0.010207	0.3145	A
AKAP1	-0.01308	0.324002	A
AKR1A1	0.067958	0.36236	A
AKR1B1	0.21905	1.67385	A
AKR1B10	0.076884	0.176558	A
AKR1B15	0.007692	0.081121	A
AKR1C1	0.096724	0.557316	A
AKR1C2	0.094815	1.04366	A
AKR1C3	0.047366	0.234391	A
AKR1C4	0.10563	0.311856	A
AKR1D1	0.023736	0.52644	A
AKR1E2	0.079106	0.205386	A
AKR7A2	-0.17994	1.05985	A
AKR7A3	-0.14936	0.643477	A
AKT1	0.097624	0.346209	A
AKT2	0.09027	0.506681	A
AKT3	-0.13354	0.317494	A
AKTIP	0.032453	0.311562	A
ALAD	0.57656	4.23356	A
ALAS1	0.41017	3.37398	A
ALAS2	0.16081	0.671559	A
ALDH16A1	-0.09649	0.640013	A
ALDH18A1	-0.00467	0.547217	A
ALDH1A1	0.27717	1.74511	A
ALDH1A2	-0.22985	1.06338	A
ALDH1A3	-0.04969	0.305333	A
ALDH1B1	0.038289	0.280694	A
ALDH1L1	0.19807	0.770113	A
ALDH1L2	0.082415	0.585227	A
ALDH2	-0.13817	0.876769	A
ALDH3A1	0.11816	0.571557	A
ALDH3A2	0.21382	1.05181	A
ALDH3B1	-0.2791	1.82163	A
ALDH3B2	-0.29727	2.37226	A
ALDH4A1	0.04758	0.448562	A
ALDH5A1	0.050992	0.159047	A
ALDH6A1	-0.0712	0.190878	A
ALDH7A1	-0.01037	0.268637	A
ALDH8A1	-0.23516	1.49656	A
ALDH9A1	-0.05132	0.194411	A
ALDOA	1.4341	6.00441	A
ALDOB	0.16374	0.549905	A
ALDOC	-0.07216	0.350432	A
ALG1	0.14018	0.533934	A
ALG10	0.014515	0.090219	A
ALG10B	-0.28531	1.4082	A
ALG11	-0.06875	0.181042	A
ALG12	-0.17768	1.0724	A
ALG13	0.094658	0.194934	A
ALG1L	0.2376	1.70808	A
ALG1L2	0.26441	1.64327	A
ALG2	0.53101	2.03216	A
ALG3	0.12769	0.331335	A
ALG5	-0.15816	0.778794	A
ALG6	0.15123	0.92216	A
ALG8	-0.12568	0.587271	A
ALG9	-0.15463	0.956009	A
ALK	-0.08776	0.604604	A
ALKBH1	0.081579	0.142318	A
ALKBH2	-0.08471	1.05015	A
ALKBH3	0.061768	0.573196	A
ALKBH4	0.082398	0.394609	A
ALKBH5	0.034228	0.302657	A
ALKBH6	0.12707	0.292677	A
ALKBH7	-0.13413	0.744969	A
ALKBH8	0.17383	0.784574	A
ALLC	-0.08749	0.655903	A
ALOX12	0.069697	0.313355	A
ALOX12B	-0.08988	0.600811	A
ALOX15	0.077908	0.276807	A
ALOX15B	0.10622	0.402557	A
ALOX5	0.046476	0.373711	A
ALOXE3	0.066903	0.466698	A
ALPK1	0.12701	0.44659	A
ALPK2	-0.16951	1.04587	A
ALPK3	-0.08267	0.440656	A
AMACR	0.003343	0.217033	A
AMD1	0.34141	2.28482	A
AMDHD1	-0.04014	0.36209	A
AMDHD2	-0.08346	0.404008	A
AMHR2	-0.01299	0.241936	A
AMPD1	0.089061	0.355138	A
AMPD2	-0.02541	0.081487	A
AMPD3	-0.07718	0.329977	A
AMT	0.085145	0.435216	A
ANG	-0.00602	0.174671	A
ANKK1	0.060803	0.699687	A
ANO1	-0.22294	2.27549	A
ANO10	0.054533	0.234294	A
ANO2	-0.00995	0.124007	A
ANO3	0.11105	0.734923	A
ANO4	0.032966	0.204885	A
ANO5	0.10571	0.384113	A
ANO6	0.10262	0.594005	A
ANO7	-0.0988	0.194336	A
ANO8	0.035802	0.2498	A
ANO9	0.055108	0.497177	A
ANPEP	0.041194	0.224951	A
ANXA7	-0.061	0.656139	A
ANXA8L1	-0.07054	0.201709	A
AOAH	0.17669	1.05059	A
AOC2	0.011987	0.230121	A
AOC3	-0.04457	0.420228	A
AOX1	0.001099	0.127046	A
APEH	-0.04271	0.223088	A
APEX1	-3.5263	6.00441	A
APEX1_2	-3.5443	6.00441	A
APEX2	-2.7206	6.00441	A
APH1A	-0.04299	0.380667	A
APH1B	-0.2201	1.04831	A
APLNR	-0.41437	2.3977	A
APOBEC1	0.002965	0.050483	A
APOBEC3G	0.19668	0.878539	A
APRT	-0.06172	0.242255	A
AQP10	0.33113	1.32672	A
AQP11	-0.11974	0.986026	A
AQP12A	-0.10184	0.36269	A
AQP12B	-0.0746	0.346585	A
AQP2	0.18575	1.03264	A
AQP3	0.11575	0.708565	A
AQP4	-0.00492	0.50118	A
AQP5	0.10479	1.50277	A
AQP6	-0.11966	0.417607	A
AQP7	0.12035	0.606249	A
AQP8	-0.14767	0.93345	A
AQP9	-0.13499	0.650121	A
ARAF	0.11073	0.34114	A
ARF1	-0.07199	0.643019	A
ARF3	0.059527	0.291222	A
ARF4	-0.23747	0.906088	A
ARFRP1	0.32226	0.791774	A
ARG1	-0.03779	0.142408	A
ARG2	0.057669	0.426757	A
ARID1A	1.0754	6.00441	A
ARID1B	0.1038	0.675512	A
ARID2	0.7356	6.00441	A
ARID3A	-0.10839	0.467908	A
ARID3B	-0.22054	2.23392	A
ARID3C	-0.09692	0.821023	A
ARID4A	-0.58567	5.05017	A
ARID4B	-0.7679	4.77397	A
ARID5A	-0.20202	1.05849	A
ARID5B	-0.09199	0.63162	A
ARIH1	-1.1881	3.68012	A
ARL1	0.51054	2.97951	A
ARL2	0.067629	0.764547	A
ARL4C	-0.10631	0.465454	A
ARL4D	-0.14509	0.611739	A
ARL8A	-0.19312	1.76927	A
ARL8B	0.022959	0.128059	A
ARMT1	0.068123	0.266442	A
ARSA	0.072089	0.538531	A
ARSB	0.17493	0.598289	A
ARSD	0.086349	0.531328	A
ARSE	0.026022	0.302378	A
ARSF	0.07219	0.332799	A
ARSG	0.066664	0.353792	A
ARSH	0.040408	0.104931	A
ARSI	-0.13874	0.637725	A
ARSJ	0.10953	0.524271	A
ARSK	-0.00124	0.40304	A
ART1	-0.03136	0.388425	A
ART3	0.18741	0.949814	A
ART4	-0.01714	0.085297	A
ART5	0.022982	0.385852	A
AS3MT	-0.09246	0.423313	A
ASAH1	0.000794	0.246976	A
ASAH2	-0.28171	1.48636	A
ASH1L	-0.1015	0.480146	A
ASH2L	-0.87762	1.83165	A
ASIC1	0.14768	1.47243	A
ASIC2	0.065739	0.452324	A
ASIC3	-0.0431	0.275028	A
ASIC4	-0.25293	1.4484	A
ASL	-0.02324	0.139297	A
ASMT	-0.07201	0.368952	A
ASMTL	0.11061	0.406503	A
ASNS	-0.14134	0.676006	A
ASNSD1	-0.11693	0.417698	A
ASPA	-0.06566	0.103099	A
ASPG	0.075594	0.291732	A
ASPH	0.098384	0.310496	A
ASPHD2	-0.04635	0.186713	A
ASPRV1	0.22282	1.08074	A
ASRGL1	-0.21585	1.22306	A
ASS1	-0.05971	0.289705	A
ASXL1	0.19844	1.11677	A
ASXL2	-0.23156	2.05742	A
ASXL3	-0.10495	0.463833	A
ATAD1	-0.1611	0.888066	A
ATAD2	-0.56441	3.07244	A
ATAD2B	-0.02609	0.1781	A
ATAD3A	-0.06751	0.45882	A
ATAD3B	-0.11388	0.742177	A
ATAD3C	-0.02691	0.137547	A
ATAD5	0.27674	1.08684	A
ATAT1	-0.25627	1.19213	A
ATE1	0.039453	0.179398	A
ATG3	0.42268	2.54366	A
ATG4A	0.05437	0.557191	A
ATG4B	0.007091	0.041871	A
ATG4C	-0.08552	0.360753	A
ATG4D	0.060243	0.333576	A
ATG7	0.37951	2.00576	A
ATIC	0.38536	2.89147	A
ATM	-0.66582	3.88713	A
ATM_2	-0.81714	6.00441	A
ATP10A	-0.2487	1.51523	A
ATP10B	-0.17773	1.07956	A
ATP10D	0.38281	3.23874	A
ATP11A	-0.28553	1.44194	A
ATP11B	0.095632	0.414438	A
ATP11C	-0.01004	0.367603	A
ATP12A	-0.12062	0.473829	A
ATP13A1	-0.14079	0.741602	A
ATP13A2	0.086463	0.418483	A
ATP13A3	-0.05417	0.546712	A
ATP13A4	0.24144	1.58444	A
ATP13A5	0.18466	0.821743	A
ATP1A1	0.12341	0.304483	A
ATP1A2	0.025061	0.09948	A
ATP1A3	-0.13878	0.945387	A
ATP1A4	0.059288	0.445862	A
ATP1B1	-0.07668	0.331754	A
ATP1B2	-0.00784	0.299391	A
ATP1B3	0.10025	0.442782	A
ATP1B4	0.03776	0.44236	A
ATP2A1	-0.16489	1.58814	A
ATP2A2	0.32274	0.866653	A
ATP2A3	0.078944	0.143942	A
ATP2B1	-0.16943	0.547202	A
ATP2B2	-0.00182	0.374966	A
ATP2B3	0.050277	0.765331	A
ATP2B4	0.081999	0.231266	A
ATP2C1	0.15773	0.744752	A
ATP2C2	0.022686	0.515444	A
ATP4A	0.067406	0.117481	A
ATP4B	-0.09152	0.748897	A
ATP5A1	0.44198	1.90518	A
ATP5B	0.22958	0.761327	A
ATP5C1	0.23968	1.21021	A
ATP5D	0.21558	0.801865	A
ATP5E	0.29747	2.5002	A
ATP5F1	0.49479	2.21209	A
ATP5G2	-0.06137	0.476371	A
ATP5G3	-0.03669	0.273884	A
ATP5H	0.40712	1.56042	A
ATP5I	0.2736	1.49082	A
ATP5J	0.3033	1.52044	A
ATP5J2	0.007617	0.05081	A
ATP5L	-0.05053	0.228913	A
ATP5L2	0.055451	0.34786	A
ATP5O	0.39727	1.99388	A
ATP6AP1	0.91641	2.83502	A
ATP6V0A2	0.044595	0.506905	A
ATP6V0A4	-0.20818	1.22442	A
ATP6V0B	0.71655	2.31519	A
ATP6V0C	0.841	2.35517	A
ATP6V0D1	-0.00872	0.137666	A
ATP6V0D2	0.076061	0.560715	A
ATP6V0E1	-0.25404	1.13338	A
ATP6V0E2	-0.1548	0.749434	A
ATP6V1A	-0.02236	0.068756	A
ATP6V1B1	0.18964	1.32193	A
ATP6V1B2	0.21082	1.68582	A
ATP6V1C1	0.58392	1.3321	A
ATP6V1C2	0.062806	0.100535	A
ATP6V1D	0.329	0.48813	A
ATP6V1E1	0.54376	1.43291	A
ATP6V1E2	-0.06171	0.144578	A
ATP6V1F	-0.09873	0.249229	A
ATP6V1G1	0.003131	0.228993	A
ATP6V1G2	-0.04193	0.196707	A
ATP6V1G3	-0.03579	0.231096	A
ATP6V1H	-0.03674	0.13085	A
ATP7A	0.30205	3.14647	A
ATP7B	-0.06578	0.206741	A
ATP8A1	0.3294	2.09469	A
ATP8A2	0.095114	0.372993	A
ATP8B1	0.016904	0.168565	A
ATP8B2	0.05145	0.188278	A
ATP8B3	-0.19666	1.01568	A
ATP8B4	-0.17664	0.769986	A
ATP9A	0.17044	1.06269	A
ATP9B	-0.05122	0.106749	A
ATR	-0.30229	0.866333	A
ATRX	-0.19856	1.13633	A
ATXN3	0.10043	0.149519	A
ATXN3L	-0.03031	0.206838	A
ATXN7	0.22292	0.911651	A
ATXN7L3	0.5855	3.85518	A
AUH	0.12708	0.356656	A
AURKA	0.039042	0.206636	A
AURKB	0.18964	0.55917	A
AURKC	-0.16103	0.706991	A
AVPR1A	0.13815	0.539448	A
AVPR1B	-0.07087	0.23114	A
AVPR2	0.026327	0.07245	A
AWAT1	0.072292	0.182805	A
AWAT2	-0.01746	0.19614	A
AXL	0.089628	0.340017	A
AZU1	-0.0211	0.374101	A
B3GALNT1	0.15477	0.567047	A
B3GALNT2	-0.07691	0.64062	A
B3GALT1	-0.10031	0.53121	A
B3GALT2	0.016134	0.319338	A
B3GALT4	-0.17003	0.839261	A
B3GALT5	0.23852	1.35483	A
B3GALT6	0.019254	0.350909	A
B3GAT1	0.020796	0.359171	A
B3GAT2	-0.10796	0.343442	A
B3GAT3	-0.33402	2.14222	A
B3GLCT	-0.03499	0.12506	A
B3GNT2	-0.18184	0.94222	A
B3GNT3	0.14294	0.613751	A
B3GNT4	-0.08695	0.498913	A
B3GNT5	0.094239	0.513995	A
B3GNT6	-0.25581	1.77845	A
B3GNT7	-0.07882	0.356429	A
B3GNT8	-0.06056	0.090332	A
B3GNT9	0.19324	1.3252	A
B3GNTL1	0.11811	0.436471	A
B4GALNT1	-0.00106	0.169655	A
B4GALNT2	-0.25331	1.23287	A
B4GALNT3	-0.20166	1.03679	A
B4GALNT4	-0.04797	0.414381	A
B4GALT1	0.03734	0.245033	A
B4GALT2	0.10221	0.394889	A
B4GALT3	-0.06885	0.237351	A
B4GALT4	0.13459	0.811522	A
B4GALT5	0.01798	0.439699	A
B4GALT6	0.072029	0.298734	A
B4GALT7	-0.15478	0.643764	A
B4GAT1	-0.37352	1.94893	A
BAAT	0.043337	0.195377	A
BABAM1	0.50982	3.55571	A
BACE1	-0.17698	1.18127	A
BACE2	0.030051	0.49879	A
BAP1	0.86222	6.00441	A
BAZ1A	-0.27871	2.2742	A
BAZ1B	0.2208	0.809416	A
BAZ2A	-0.57174	3.1829	A
BAZ2B	-0.1745	0.804266	A
BBOX1	-0.12072	0.520007	A
BCAT1	-0.03992	0.291469	A
BCAT2	-0.1644	1.14161	A
BCHE	0.24385	1.04406	A
BCKDHA	-0.09053	0.400237	A
BCKDHB	-0.02946	0.407313	A
BCKDK	-0.07988	0.342227	A
BCO2	-0.20796	1.17595	A
BCS1L	0.30376	1.86186	A
BDH1	-0.00829	0.099606	A
BDH2	0.098365	0.540623	A
BDKRB1	0.077447	0.391613	A
BDKRB2	0.032741	0.054586	A
BEST1	-0.11256	0.768225	A
BEST2	0.29171	1.86506	A
BEST3	-0.00302	0.124782	A
BEST4	-0.25974	1.21775	A
BHMT	0.05069	0.108195	A
BHMT2	0.11207	0.414021	A
BIRC6	0.19687	1.00617	A
BLK	0.070754	0.628194	A
BLM	-2.3692	6.00441	A
BLMH	0.1075	0.29794	A
BLVRA	0.059145	0.467322	A
BLVRB	-0.07409	0.505386	A
BMI1	0.062349	0.289028	A
BMP1	-0.06221	1.01501	A
BMP2K	-0.00818	0.145828	A
BMPR1A	0.10115	0.333754	A
BMPR1B	0.13838	0.795527	A
BMPR2	-0.12184	0.828361	A
BMX	-0.15822	0.841819	A
BOP1	0.48621	1.63251	A
BPGM	0.014971	0.057248	A
BPHL	-0.04498	0.293026	A
BPNT1	0.15757	0.739237	A
BPTF	0.65479	4.51305	A
BRAF	0.050007	0.084611	A
BRCC3	0.36721	2.14569	A
BRD1	0.23339	1.19242	A
BRD2	-1.2558	6.00441	A
BRD3	0.14277	0.836898	A
BRD4	0.12212	1.39319	A
BRD7	0.069743	0.729671	A
BRD8	0.39316	2.33185	A
BRD9	0.009993	0.091885	A
BRDT	0.19272	0.852664	A
BRIP1	-0.96369	4.89046	A
BRPF1	-0.65426	6.00441	A
BRPF3	-0.01421	0.708276	A
BRS3	0.10175	0.299495	A
BRSK1	-0.11464	0.440345	A
BRSK2	-0.11447	0.457411	A
BRWD1	0.051301	0.740717	A
BRWD3	-0.10194	0.359697	A
BSND	0.12918	0.661922	A
BTBD10	-0.01875	0.51374	A
BTD	0.087653	0.531919	A
BTK	0.053319	0.105828	A
BUB1	-0.23217	1.0567	A
BUB1B	0.36496	1.52084	A
C1GALT1	0.18602	1.00731	A
C1R	0.13429	0.696566	A
C1RL	-0.0418	0.3218	A
C1S	-0.06523	0.097127	A
C2	-0.22143	1.85344	A
C3	0.044596	0.071999	A
C3AR1	-0.05348	0.211924	A
C5AR1	0.056602	0.117254	A
C5AR2	0.043141	0.274072	A
CA12	-0.2547	1.35262	A
CA9	0.01297	0.514477	A
CACNA1A	0.062579	0.355512	A
CACNA1B	0.14549	0.847009	A
CACNA1C	0.014409	0.215789	A
CACNA1D	-0.08543	0.167542	A
CACNA1E	0.013447	0.470903	A
CACNA1F	0.067534	0.325865	A
CACNA1G	0.040122	0.203544	A
CACNA1H	-0.02177	0.058022	A
CACNA1I	0.090115	0.333622	A
CACNA1S	-0.23059	1.53364	A
CACNA2D1	0.002247	0.056733	A
CACNA2D2	0.04616	0.335584	A
CACNA2D3	-0.03134	0.098727	A
CACNA2D4	0.05682	0.585612	A
CACNB1	0.012825	0.142203	A
CACNB2	0.090104	0.370805	A
CACNB3	0.16899	0.818986	A
CACNB4	-0.15213	0.997618	A
CACNG1	0.044232	0.455349	A
CACNG2	0.10257	0.606337	A
CACNG3	0.000444	0.096747	A
CACNG4	-0.03766	0.446445	A
CACNG5	0.099428	0.393941	A
CACNG6	-0.12129	0.764547	A
CACNG7	-0.21568	1.22569	A
CACNG8	0.057369	0.073508	A
CAD	-1.3126	6.00441	A
CALCR	-0.04289	0.105667	A
CALCRL	0.11546	0.664522	A
CAMK1	-0.07704	0.4698	A
CAMK1G	0.10395	0.553013	A
CAMK2A	-0.09609	0.645872	A
CAMK2B	-0.01132	0.063386	A
CAMK2D	0.007749	0.354273	A
CAMK2G	-0.07861	0.233602	A
CAMK4	-0.18525	0.986573	A
CAMKK1	-0.03572	0.268847	A
CAMKK2	0.076898	0.148265	A
CAMKMT	-0.1087	0.584342	A
CAMKV	0.13408	0.402996	A
CANT1	0.016254	0.363813	A
CAPN1	-0.39243	2.82746	A
CAPN10	-0.0697	0.337318	A
CAPN11	-0.32657	2.205	A
CAPN12	0.241	1.00764	A
CAPN2	-0.14413	0.542663	A
CAPN3	-0.20056	1.17217	A
CAPN5	-0.15194	1.02007	A
CAPN6	0.055851	0.184183	A
CAPN7	0.008977	0.175861	A
CAPN9	-0.05806	0.265224	A
CAPNS1	-0.01056	0.303836	A
CARD14	-0.01779	0.205805	A
CARM1	0.25023	1.99594	A
CARNS1	-0.21935	1.24008	A
CASK	0.21924	0.956992	A
CASP1	0.014405	0.119787	A
CASP10	0.025983	0.24736	A
CASP12	-0.17767	0.745041	A
CASP14	0.060888	0.449845	A
CASP2	0.34572	3.46658	A
CASP3	0.078895	0.584926	A
CASP4	-0.17561	1.02225	A
CASP5	-0.0165	0.99512	A
CASP6	0.13028	0.560557	A
CASP7	-0.08275	0.469199	A
CASP8	-0.10714	0.449454	A
CASP9	0.030033	0.258069	A
CASR	0.15638	0.883957	A
CAST	-0.02591	0.500368	A
CAT	0.10545	0.730487	A
CATSPER1	-0.35385	2.24045	A
CATSPER2	-0.03936	0.297759	A
CATSPER3	-0.14652	0.869698	A
CATSPER4	0.077569	0.199599	A
CBR1	0.085106	0.295601	A
CBR3	-0.07372	0.16429	A
CBR4	0.026978	0.193095	A
CBS	-0.06819	0.14309	A
CBX1	0.38436	2.16613	A
CBX2	-0.03543	0.531033	A
CBX3	0.25488	2.46022	A
CBX4	0.086341	0.273419	A
CBX5	0.28086	1.21409	A
CBX6	0.035874	0.069076	A
CBX7	0.13432	0.856392	A
CBX8	0.079091	0.09556	A
CCKAR	0.0854	0.503292	A
CCKBR	0.05814	0.513159	A
CCND1	-1.6072	6.00441	A
CCNE1	-0.3036	1.17114	A
CCR1	0.026434	0.283146	A
CCR10	-0.03244	0.166713	A
CCR2	0.013648	0.248313	A
CCR3	0.047474	0.306774	A
CCR4	-0.03124	0.785819	A
CCR5	0.006329	0.271046	A
CCR6	0.10125	0.356972	A
CCR7	0.10662	0.600499	A
CCR8	-0.02292	0.143507	A
CCR9	0.035774	0.27675	A
CCRL2	1.4e-05	0.513711	A
CCT8L2	0.032503	0.286081	A
CD38	0.18239	0.68487	A
CDA	0.081295	1.47605	A
CDADC1	0.002221	0.301682	A
CDC25A	-0.15168	1.59898	A
CDC25B	-0.52408	3.11176	A
CDC25C	-0.1673	1.1756	A
CDC34	-0.10663	0.983259	A
CDC42BPA	0.001255	0.186299	A
CDC42BPB	0.040506	0.131326	A
CDC42BPG	-0.33552	2.88616	A
CDC7	-0.32343	0.444217	A
CDIPT	-0.45137	3.45419	A
CDK1	-0.15375	0.363071	A
CDK10	0.17627	0.980344	A
CDK11A	0.027882	0.4212	A
CDK11B	0.00379	0.064896	A
CDK12	-0.45066	0.598548	A
CDK13	-0.28447	1.20319	A
CDK14	0.031797	0.128591	A
CDK15	-0.23896	2.02146	A
CDK16	-0.04577	0.475396	A
CDK17	-0.03222	0.237022	A
CDK18	-0.06609	0.363763	A
CDK19	-0.2154	1.12606	A
CDK2	0.7521	4.72566	A
CDK20	0.18567	0.919301	A
CDK3	0.25969	1.47658	A
CDK4	0.25158	1.31857	A
CDK5	0.003469	0.162348	A
CDK6	-1.2436	6.00441	A
CDK7	0.23154	0.321964	A
CDK8	0.53717	3.33324	A
CDK9	0.83424	3.79759	A
CDKL1	-0.29862	1.36322	A
CDKL2	0.38881	2.2111	A
CDKL3	0.081324	0.448014	A
CDKL4	0.19285	0.872377	A
CDKL5	-0.04854	0.088624	A
CDO1	0.067071	0.240264	A
CDS1	0.11629	0.38816	A
CDS2	0.18039	0.910166	A
CDY1	0.13038	0.693811	A
CDY1B	0.10089	0.350315	A
CDY2A	0.045738	0.124088	A
CDY2B	0.070778	0.4797	A
CDYL	-0.04919	0.438374	A
CDYL2	-0.02695	0.283621	A
CECR2	-0.13543	0.569264	A
CEL	0.00835	0.26241	A
CELA1	-0.0557	0.461803	A
CELA2A	-0.01614	0.185686	A
CELA2B	0.032928	0.278288	A
CELA3A	-0.00478	0.166674	A
CELA3B	-0.0438	0.166273	A
CELSR1	0.023	0.151786	A
CELSR2	0.18631	0.602077	A
CELSR3	0.053159	0.350422	A
CERK	0.1991	1.79719	A
CERKL	-0.1378	0.527595	A
CERS1	-0.03432	0.080817	A
CERS2	-0.07528	0.94002	A
CERS3	-0.19699	1.08891	A
CERS4	0.079264	0.424247	A
CERS6	-0.05801	0.106499	A
CES1	-0.16449	0.643133	A
CES2	0.054128	0.501428	A
CES3	-0.25448	1.74208	A
CES4A	0.012889	0.128153	A
CES5A	-0.12362	0.687928	A
CETP	-0.0466	0.347348	A
CFB	0.036084	0.051509	A
CFD	-0.17792	0.976089	A
CFI	0.16381	1.03802	A
CFTR	0.050545	0.265288	A
CH25H	-0.08102	0.338727	A
CHAF1A	0.29765	1.76744	A
CHAF1B	-0.0113	0.378388	A
CHAT	0.006399	0.255558	A
CHD1	0.039192	0.280602	A
CHD1L	0.044585	0.452989	A
CHD2	-0.32137	2.36762	A
CHD3	-0.14592	0.486183	A
CHD4	-0.60482	1.39159	A
CHD5	-0.01742	0.356301	A
CHD6	-0.02842	0.111349	A
CHD7	-0.70959	4.10678	A
CHD9	0.14527	1.73459	A
CHDH	0.080771	0.4515	A
CHEK1	-0.83455	0.819215	A
CHEK2	-0.0191	0.199407	A
CHFR	0.034344	0.359171	A
CHI3L1	-0.02299	0.246011	A
CHI3L2	0.24704	1.03565	A
CHIA	0.23437	1.13053	A
CHID1	0.024927	0.075142	A
CHIT1	0.078871	0.136261	A
CHKA	-0.58186	3.70121	A
CHKB	0.024273	0.241088	A
CHMP1A	-0.49232	2.36283	A
CHPT1	-0.11109	0.797457	A
CHRFAM7A	-0.14715	0.897052	A
CHRM1	-0.35676	2.83035	A
CHRM2	-0.07808	0.115499	A
CHRM3	0.013378	0.032031	A
CHRM4	0.071591	0.201902	A
CHRM5	-0.51882	3.358	A
CHRNA1	-0.08081	0.588919	A
CHRNA10	0.060493	0.585863	A
CHRNA2	0.21758	1.64722	A
CHRNA3	-0.05794	0.443468	A
CHRNA4	0.035639	0.270973	A
CHRNA5	0.003102	0.127558	A
CHRNA6	0.012734	0.162487	A
CHRNA7	-0.14735	1.58786	A
CHRNA9	0.27186	1.58576	A
CHRNB1	0.1142	0.509143	A
CHRNB2	0.058114	0.177374	A
CHRNB3	-0.06252	0.448526	A
CHRNB4	-0.15584	0.75995	A
CHRND	0.036315	0.233119	A
CHRNE	-0.22378	1.33147	A
CHRNG	-0.20576	1.26689	A
CHST1	0.081847	0.471752	A
CHST10	-0.25747	1.4607	A
CHST11	0.051604	0.598858	A
CHST12	-0.01297	0.275192	A
CHST13	-0.02203	0.089867	A
CHST14	-0.28478	1.25815	A
CHST15	0.17899	0.83529	A
CHST2	0.077518	0.320799	A
CHST3	-0.0293	0.503693	A
CHST4	0.02587	0.354538	A
CHST5	0.006205	0.238222	A
CHST6	0.063503	0.454705	A
CHST7	-0.02668	0.298717	A
CHST8	0.046276	0.063728	A
CHST9	0.10992	0.512932	A
CHSY1	-0.00876	0.047246	A
CHSY3	0.014793	0.085482	A
CHTF18	-0.22392	1.25001	A
CHUK	-0.07371	0.156225	A
CIT	0.045019	0.144529	A
CKB	0.01276	0.087906	A
CKM	0.028824	0.337204	A
CKMT1A	-0.37446	2.21702	A
CKMT2	0.028946	0.275118	A
CLCA1	-0.00096	0.073416	A
CLCA2	0.060139	0.210617	A
CLCA4	0.20001	1.11569	A
CLCC1	-0.38568	1.26036	A
CLCN1	0.027996	0.147282	A
CLCN2	0.058526	0.493022	A
CLCN3	-0.00269	0.09469	A
CLCN4	0.14237	0.829298	A
CLCN5	0.17782	0.877293	A
CLCN6	0.13661	1.68386	A
CLCN7	-0.02675	0.080854	A
CLCNKA	-0.01833	0.339571	A
CLGN	0.063787	0.420617	A
CLIC1	-0.05062	0.097654	A
CLIC2	-0.08361	0.589864	A
CLIC3	0.075045	0.170928	A
CLIC4	-0.12582	0.413087	A
CLIC5	-0.02764	0.423175	A
CLIC6	0.040743	0.209623	A
CLK1	0.17644	1.02078	A
CLK2	0.356	2.39599	A
CLK3	0.12651	0.835796	A
CLK4	0.083591	0.158115	A
CLNS1A	-0.17684	0.526061	A
CLOCK	0.32647	2.36802	A
CLPP	0.054726	0.305298	A
CLPX	-0.57067	2.64782	A
CLYBL	-0.03558	0.456627	A
CMA1	-0.02017	0.13195	A
CMAS	0.096273	0.120657	A
CMBL	-0.08523	0.330646	A
CMKLR1	-0.05508	0.116526	A
CMPK1	1.4985	4.72566	A
CMPK2	0.17368	0.823214	A
CMTR1	-0.69179	2.7245	A
CMTR2	0.96143	6.00441	A
CNDP1	0.024185	0.530193	A
CNDP2	0.17765	0.859146	A
CNGA1	0.27659	1.77435	A
CNGA2	0.08981	0.437767	A
CNGA3	0.026111	0.086393	A
CNGA4	0.12118	0.709431	A
CNGB1	0.009569	0.253397	A
CNGB3	0.15799	0.95546	A
CNNM4	0.048303	0.383619	A
CNP	0.12512	0.656021	A
CNR1	0.12922	0.839531	A
CNR2	0.0967	0.576934	A
CNTNAP3B	0.000523	0.22685	A
COASY	-0.21543	0.578347	A
COMT	-0.31049	1.40399	A
COMTD1	-0.09799	0.370856	A
COPS5	-0.6968	0.919879	A
COQ2	0.50368	3.0163	A
COQ3	0.11698	0.366653	A
COQ5	0.50164	3.67603	A
COQ6	0.20233	0.542694	A
COQ7	0.12072	0.330609	A
COQ8A	0.083871	0.351377	A
COQ8B	-0.0739	0.127558	A
CORIN	0.29852	2.00393	A
COX6A1	0.10515	0.468611	A
CP	0.012729	0.213618	A
CPA1	0.005907	0.142945	A
CPA2	-0.01604	0.163012	A
CPA3	0.19261	0.803851	A
CPA4	-0.06917	0.118245	A
CPA5	0.007025	0.201142	A
CPA6	0.083837	0.303836	A
CPB1	0.14141	0.837495	A
CPB2	-0.05778	0.148027	A
CPD	0.052514	0.129906	A
CPE	0.031136	0.212873	A
CPM	0.002597	0.056135	A
CPN1	0.062861	0.218611	A
CPN2	-0.05068	0.096606	A
CPO	-0.07003	0.214699	A
CPOX	0.46663	3.81973	A
CPPED1	-0.20173	1.15467	A
CPS1	-0.1163	0.57471	A
CPT1A	-0.18504	2.16993	A
CPT1B	0.042205	0.282321	A
CPT1C	-0.25605	2.20929	A
CPT2	0.075777	0.126307	A
CPVL	0.023983	0.108	A
CPXM1	0.11883	0.615163	A
CPXM2	-0.02363	0.086266	A
CPZ	-0.1058	0.36729	A
CRAT	0.10679	0.560983	A
CREBBP	0.020212	0.138095	A
CRHR1	0.028708	0.082148	A
CRHR2	0.054228	0.097404	A
CRKL	-0.7542	2.32471	A
CRLS1	0.22241	0.947191	A
CROT	0.062601	0.380239	A
CRYZ	0.222	1.14696	A
CRYZL1	0.022556	0.35296	A
CS	0.42965	4.09592	A
CSAD	-0.0354	0.086827	A
CSF1R	-0.06313	0.690519	A
CSGALNACT1	-0.05701	0.297871	A
CSGALNACT2	0.071932	0.30176	A
CSK	-0.64551	4.37094	A
CSNK1A1	1.1748	6.00441	A
CSNK1A1L	-0.07518	0.522488	A
CSNK1D	0.12103	0.87031	A
CSNK1E	-0.05396	0.393565	A
CSNK1G1	-0.4167	4.35119	A
CSNK1G2	-0.03681	0.257699	A
CSNK1G3	0.073932	0.360175	A
CSNK2A1	0.17844	0.807879	A
CSNK2A2	-0.18302	0.874681	A
CSNK2A3	0.006903	0.308291	A
CSNK2B	-0.87039	2.46345	A
CTAGE1	-0.14107	0.469928	A
CTBS	0.10221	0.41821	A
CTH	0.029582	0.26512	A
CTPS1	-1.0441	6.00441	A
CTPS2	0.066574	0.820046	A
CTRB1	0.068162	0.501938	A
CTRB2	-0.05888	0.395731	A
CTRC	-0.05758	0.427721	A
CTRL	0.067628	0.388086	A
CTSA	0.144	0.897258	A
CTSB	0.10964	0.587036	A
CTSC	-0.02156	0.186306	A
CTSD	0.16216	0.88306	A
CTSE	-0.03136	0.56508	A
CTSF	-0.37964	1.91215	A
CTSG	-0.09233	0.687061	A
CTSH	-0.03689	0.285109	A
CTSK	0.11045	0.415194	A
CTSL	0.086988	0.372562	A
CTSO	0.068937	0.150065	A
CTSS	0.024945	0.151214	A
CTSV	0.10088	0.724666	A
CTSW	-0.16947	1.68795	A
CTSZ	0.038146	0.195779	A
CUL5	0.044244	0.267566	A
CWC27	0.15727	0.847956	A
CX3CR1	0.26228	1.31637	A
CXCR1	-0.04309	0.387693	A
CXCR2	-0.27884	2.46823	A
CXCR3	0.092028	0.451181	A
CXCR4	-0.09909	0.339419	A
CXCR5	-0.10208	0.705512	A
CXCR6	-0.02747	0.433186	A
CXXC1	-1.7054	6.00441	A
CYB5R1	-0.03149	0.227312	A
CYB5R2	0.023919	0.380521	A
CYB5R3	0.08363	0.384924	A
CYB5R4	0.054148	0.408535	A
CYB5RL	0.1883	0.90108	A
CYLD	-0.70765	2.71908	A
CYP11A1	-0.27317	1.31078	A
CYP11B1	-0.23181	1.2518	A
CYP11B2	-0.22391	1.38007	A
CYP17A1	-0.08892	0.122053	A
CYP19A1	-0.09177	0.572514	A
CYP1A1	-0.23655	1.50416	A
CYP1A2	-0.17412	0.950239	A
CYP1B1	-0.13461	0.621003	A
CYP20A1	0.032562	0.216425	A
CYP21A2	-0.0159	0.536899	A
CYP24A1	0.036398	0.409414	A
CYP26A1	0.009706	0.171701	A
CYP26B1	-0.05251	0.202871	A
CYP27A1	0.12809	0.625875	A
CYP27B1	0.005291	0.334926	A
CYP2A13	-0.15021	0.84339	A
CYP2A6	0.14162	0.767258	A
CYP2A7	0.055469	0.2922	A
CYP2B6	-0.10774	0.460334	A
CYP2C18	-0.01113	0.211075	A
CYP2C19	0.17696	0.8111	A
CYP2C8	0.13183	0.572628	A
CYP2C9	-0.04843	0.656572	A
CYP2D6	0.21307	0.985437	A
CYP2E1	-0.00214	0.092202	A
CYP2F1	-0.01261	0.41944	A
CYP2J2	0.08318	0.313149	A
CYP2R1	-0.07418	0.097992	A
CYP2S1	-0.0406	0.117851	A
CYP2U1	0.044099	0.177871	A
CYP2W1	0.11456	0.712512	A
CYP39A1	-0.2549	1.47264	A
CYP3A4	-0.08252	0.322959	A
CYP3A43	-0.01856	0.180621	A
CYP3A5	0.012687	0.091504	A
CYP3A7	-0.13331	0.851181	A
CYP46A1	-0.08659	0.361321	A
CYP4A11	0.010367	0.329634	A
CYP4A22	0.035276	0.111119	A
CYP4B1	0.020308	0.260562	A
CYP4F11	-0.02845	0.103182	A
CYP4F12	0.19378	0.994734	A
CYP4F2	0.072735	0.1334	A
CYP4F22	0.20935	1.02341	A
CYP4F3	0.11549	0.527639	A
CYP4F8	0.25341	2.49967	A
CYP4V2	0.10897	0.449674	A
CYP4X1	0.10151	0.295258	A
CYP4Z1	0.071697	0.74043	A
CYP51A1	-0.17757	0.897738	A
CYP7A1	0.19967	0.829885	A
CYP7B1	-0.03114	0.263452	A
CYP8B1	-0.16159	0.831296	A
CYSLTR1	0.11541	0.260855	A
CYSLTR2	-0.12242	0.803741	A
D2HGDH	-0.03118	0.320281	A
DAGLA	-0.61485	3.69265	A
DAGLB	-0.03548	0.373218	A
DAO	0.010242	0.138448	A
DAPK1	0.11154	0.452213	A
DAPK2	-0.06242	0.688013	A
DAPK3	0.042854	0.572222	A
DBH	-0.03853	0.143839	A
DBR1	-0.00105	0.090123	A
DBT	0.090977	0.300206	A
DCK	0.16672	0.841728	A
DCLK1	-0.06861	0.135406	A
DCLK2	0.10648	0.317819	A
DCLK3	0.2833	1.89306	A
DCT	0.043483	0.136754	A
DCTD	0.19531	0.850781	A
DCTPP1	-0.03435	0.141661	A
DCXR	0.12164	0.721086	A
DDAH1	0.093993	0.453112	A
DDAH2	-0.03762	0.118958	A
DDC	0.020329	0.364154	A
DDHD2	0.099959	0.280354	A
DDO	0.07436	0.425633	A
DDR1	-0.30368	1.44358	A
DDR2	0.1005	0.504151	A
DDT	-0.01991	0.141697	A
DDX1	0.19825	0.673787	A
DDX10	0.82646	1.91272	A
DDX11	-1.1037	3.81409	A
DDX17	-0.28207	1.19696	A
DDX18	0.045434	0.291571	A
DDX19A	0.021418	0.105053	A
DDX19B	-0.06744	0.48971	A
DDX20	0.45145	1.33684	A
DDX21	1.0904	3.16999	A
DDX23	-0.65462	3.95908	A
DDX24	0.85458	3.81973	A
DDX25	-0.05544	0.252355	A
DDX27	1.1119	6.00441	A
DDX28	0.071325	0.173601	A
DDX31	0.063831	0.084357	A
DDX39A	0.10323	0.342724	A
DDX39B	-0.02833	0.072429	A
DDX3X	0.25549	0.518572	A
DDX3Y	0.16476	0.851552	A
DDX4	-0.0059	0.161038	A
DDX41	-0.02311	0.161346	A
DDX42	-0.46624	2.72589	A
DDX43	-0.0654	0.467055	A
DDX46	-0.41873	1.12885	A
DDX47	0.62052	2.76361	A
DDX49	0.56452	1.46204	A
DDX5	-0.30443	1.62679	A
DDX50	-0.05734	0.192289	A
DDX51	0.98349	2.83387	A
DDX52	0.017261	0.548536	A
DDX53	0.14504	0.817158	A
DDX54	1.3891	6.00441	A
DDX55	1.0664	6.00441	A
DDX56	0.27285	1.07206	A
DDX58	-0.13246	0.481842	A
DDX59	-0.38493	0.758678	A
DDX6	-2.4415	6.00441	A
DDX60	0.057513	0.321554	A
DECR1	-0.01718	0.074075	A
DECR2	-0.04876	0.147697	A
DEGS1	0.053988	0.454013	A
DEGS2	0.056483	0.430579	A
DGAT1	0.085859	0.195098	A
DGAT2	-0.1585	0.808745	A
DGAT2L6	-0.12513	0.450531	A
DGKA	-0.06269	0.376916	A
DGKB	0.043909	0.08721	A
DGKD	0.064422	0.301873	A
DGKE	0.015595	0.825301	A
DGKG	0.13389	0.511774	A
DGKH	-0.07749	0.473712	A
DGKI	-0.14997	1.82673	A
DGKK	0.12659	0.559642	A
DGKQ	0.039972	0.466469	A
DGKZ	0.13779	0.647065	A
DGUOK	0.11607	0.704521	A
DHCR24	0.17412	0.880645	A
DHCR7	-0.0525	0.44301	A
DHDDS	0.027311	0.135133	A
DHDH	-0.05865	0.478535	A
DHFR	-0.80132	1.96086	A
DHFR2	-0.30218	1.00041	A
DHH	0.015885	0.153317	A
DHODH	-0.20309	0.953427	A
DHPS	0.23045	0.608659	A
DHRS1	-0.40614	2.05595	A
DHRS11	-0.26375	1.15536	A
DHRS12	0.001016	0.288353	A
DHRS13	-0.31612	1.53753	A
DHRS2	0.03812	0.107861	A
DHRS3	-0.2997	3.4979	A
DHRS4	0.030445	0.242202	A
DHRS4L2	-0.01062	0.105086	A
DHRS7	-0.07702	0.400128	A
DHRS7B	-0.20726	1.29542	A
DHRS7C	0.11541	0.483994	A
DHRS9	-0.08973	0.383419	A
DHRSX	-0.02357	0.530046	A
DHTKD1	0.004852	0.059419	A
DHX15	0.50382	1.82031	A
DHX16	-0.01239	0.40315	A
DHX29	-0.91405	6.00441	A
DHX30	0.31191	1.45812	A
DHX32	0.001856	0.183878	A
DHX33	0.58691	2.59464	A
DHX34	-0.04588	0.451832	A
DHX35	0.078279	0.353126	A
DHX36	-0.43978	1.85546	A
DHX37	0.83082	3.31333	A
DHX38	0.074968	0.208752	A
DHX40	0.13592	0.567608	A
DHX58	0.017448	0.352754	A
DHX8	0.30714	1.0013	A
DHX9	1.3567	6.00441	A
DICER1	-1.0612	6.00441	A
DIDO1	-0.68434	3.83708	A
DIO1	0.14892	0.948616	A
DIO2	0.13994	0.766699	A
DIO3	-0.03985	0.209405	A
DLAT	0.23406	1.13686	A
DLD	-0.09975	0.16979	A
DLST	-0.30915	1.10007	A
DMAP1	-0.10188	0.696048	A
DMGDH	-0.12927	0.707722	A
DMPK	0.058072	0.120818	A
DNAJB2	0.043814	0.303906	A
DNMT1	0.25939	1.00316	A
DNMT3A	-0.00802	0.137588	A
DNMT3B	0.12254	0.579005	A
DNMT3L	0.14088	0.753058	A
DNPEP	0.21398	1.26961	A
DNTT	-0.03738	0.214862	A
DOHH	-0.03958	0.101527	A
DOLK	-0.3154	1.81076	A
DOLPP1	0.14311	0.775881	A
DOT1L	0.013055	0.101253	A
DPAGT1	-0.1738	0.267518	A
DPEP1	0.003194	0.198617	A
DPEP2	-0.20986	0.817785	A
DPEP3	-0.15442	0.80964	A
DPF1	-0.12421	0.320518	A
DPF2	0.41418	3.58446	A
DPF3	0.017289	0.104025	A
DPH5	0.28797	2.10882	A
DPM1	-0.0713	0.565319	A
DPM2	0.020721	0.206678	A
DPM3	-0.18322	0.934271	A
DPP10	-0.09553	0.59363	A
DPP3	0.087436	0.593869	A
DPP4	0.036918	0.123453	A
DPP6	-0.20782	1.17946	A
DPP7	0.060923	0.590506	A
DPP8	-0.24196	0.933004	A
DPP9	0.57584	6.00441	A
DPY30	-0.39414	3.10954	A
DPYD	0.10275	0.428314	A
DPYS	0.078188	0.738214	A
DPYSL2	0.14218	0.680415	A
DPYSL3	0.035693	0.11011	A
DPYSL4	0.054574	0.438755	A
DPYSL5	0.01463	0.470185	A
DQX1	-0.12314	0.498297	A
DRD1	0.12879	0.71442	A
DRD2	-0.18935	1.06061	A
DRD3	0.1222	0.693125	A
DRD4	0.068876	0.604883	A
DRD5	0.037262	0.411482	A
DROSHA	-0.34403	1.47618	A
DSE	-0.08774	0.394857	A
DSEL	0.18109	0.871924	A
DSTYK	0.10231	0.453198	A
DTD1	0.099909	0.759725	A
DTYMK	-1.7049	4.8283	A
DUOX1	-0.32294	2.36822	A
DUOX2	-0.27392	1.74199	A
DUT	-1.1437	1.78563	A
DYNC1H1	-1.3524	1.83068	A
DYRK1A	1.4917	6.00441	A
DYRK1B	0.06732	0.365392	A
DYRK2	0.1182	0.4262	A
DYRK3	0.036844	0.077347	A
DYRK4	-0.05524	0.320717	A
EARS2	0.092142	0.988345	A
ECE1	-0.06314	0.499901	A
ECE2	0.008791	0.261093	A
ECEL1	-0.20678	1.2737	A
ECH1	0.085806	0.271638	A
ECHDC1	-0.00319	0.336968	A
ECHDC2	-0.01544	0.108217	A
ECHS1	0.009693	0.68079	A
ECI1	-0.02064	0.294761	A
ECI2	0.003058	0.189049	A
EDNRA	0.002528	0.228302	A
EDNRB	-0.02318	0.088475	A
EED	-0.12798	0.332996	A
EEF1A1	0.48676	1.97053	A
EEF1AKMT1	-0.0624	0.143882	A
EEF1AKMT2	-0.01358	0.082642	A
EEF1AKMT3	-0.05918	0.16767	A
EEF2K	-0.03791	0.82134	A
EEF2KMT	-0.0007	0.626794	A
EFNA3	-0.02109	0.061771	A
EFNA4	-0.04149	0.093552	A
EFNB3	0.21496	1.06855	A
EGFR	-0.02954	0.173116	A
EGLN1	-0.0928	0.469301	A
EGLN2	-0.0516	0.364858	A
EGLN3	-0.02161	0.287291	A
EHHADH	0.082769	0.498448	A
EHMT1	0.066572	0.111517	A
EHMT2	-0.59967	3.41446	A
EIF2AK1	0.031824	0.20068	A
EIF2AK2	0.14818	0.758603	A
EIF2AK3	-0.1909	0.961102	A
EIF2AK4	-0.01168	0.105529	A
EIF4A1	0.7194	2.969	A
EIF4A2	0.14217	0.597292	A
ELANE	-0.00507	0.402744	A
ELOVL1	-0.18776	0.802995	A
ELOVL2	-0.07671	0.217735	A
ELOVL3	-0.02465	0.231318	A
ELOVL4	-0.17295	0.957149	A
ELOVL5	-0.25003	1.22721	A
ELOVL6	0.27154	1.31226	A
ELOVL7	-0.00995	0.177028	A
ELP2	0.41386	1.41788	A
ELP3	0.1732	0.417414	A
ELP4	0.16364	0.936592	A
ELP5	0.1619	0.397517	A
ELP6	0.16356	0.564299	A
EMG1	0.64097	3.27605	A
ENDOG	-0.01887	0.051714	A
ENDOU	0.13988	0.852447	A
ENGASE	0.20403	1.23977	A
ENO1	0.54496	3.44691	A
ENO2	0.10325	0.468419	A
ENO3	-0.0567	0.16139	A
ENOPH1	0.10313	0.807321	A
ENOSF1	-0.2003	1.593	A
ENOX1	-0.03036	0.128766	A
ENOX2	0.067964	0.122059	A
ENPEP	0.28098	1.18244	A
ENPP1	0.062767	0.453605	A
ENPP2	-0.0498	0.225096	A
ENPP3	0.21838	2.34802	A
ENPP4	-0.17141	0.896744	A
ENPP5	-0.04106	0.458496	A
ENPP6	-0.1412	0.51021	A
ENPP7	0.14443	0.706262	A
ENTPD1	0.13363	0.8987	A
ENTPD2	0.12664	0.533562	A
ENTPD3	-0.06063	0.335067	A
ENTPD4	0.000184	0.048172	A
ENTPD5	0.035943	0.070852	A
ENTPD6	0.17872	1.02633	A
ENTPD7	0.00412	0.152594	A
ENTPD8	-0.04802	0.376275	A
ENY2	-0.69915	1.44225	A
EP300	0.50382	4.35119	A
EP400	0.00858	0.173375	A
EPB42	-0.13324	0.63558	A
EPC1	-0.08234	0.587573	A
EPC2	0.13865	0.716586	A
EPHA1	0.075222	0.286888	A
EPHA10	-0.04995	0.59346	A
EPHA2	0.17697	0.991144	A
EPHA3	0.097191	0.369145	A
EPHA4	-0.17918	0.873382	A
EPHA5	0.33223	2.66855	A
EPHA6	0.18524	0.766319	A
EPHA7	-0.14568	0.538712	A
EPHA8	0.011477	0.247306	A
EPHB1	0.12059	0.603417	A
EPHB2	0.041632	0.214677	A
EPHB3	0.17798	0.995163	A
EPHB4	-0.01958	0.188995	A
EPHB6	0.003898	0.055937	A
EPHX1	-0.03874	0.671784	A
EPHX2	0.03106	0.143525	A
EPHX3	0.17883	1.69133	A
EPHX4	0.091965	0.231939	A
EPX	0.030634	0.077119	A
ERAP1	0.009058	0.131961	A
ERAP2	-0.00438	0.217005	A
ERBB2	-0.20203	1.78021	A
ERBB3	-0.02306	0.717763	A
ERBB4	0.1034	0.500478	A
ERCC1	-2.0859	6.00441	A
ERCC4	-2.3791	6.00441	A
ERI1	-0.2522	1.36104	A
ERMP1	-0.10547	0.386338	A
ERN1	0.11574	0.809388	A
ERN2	0.00737	0.133872	A
ERP27	-0.00476	0.442216	A
ERP29	0.006812	0.125425	A
ERP44	0.23113	1.13496	A
ESCO1	-0.04412	0.497682	A
ESCO2	-0.9461	6.00441	A
ESD	-0.03916	0.702853	A
ESPL1	0.48715	0.669343	A
ETFBKMT	0.043016	0.44348	A
ETFDH	0.12309	0.555409	A
ETNK1	0.086284	0.335273	A
ETNK2	0.051619	0.443468	A
EXOG	0.17467	1.79493	A
EXT1	-0.41381	1.84013	A
EXT2	0.25871	1.21221	A
EXTL1	-0.03093	0.207349	A
EXTL2	-0.04353	0.696178	A
EXTL3	0.083269	0.306572	A
EZH1	0.26585	1.27629	A
EZH2	0.010438	0.047711	A
F10	-0.05027	0.52385	A
F11	0.023964	0.386983	A
F12	0.003482	0.108764	A
F13A1	-0.07684	0.375429	A
F2	0.10768	0.680644	A
F2R	-0.12065	0.512551	A
F2RL1	-0.05976	0.584893	A
F2RL2	-0.19614	1.03335	A
F2RL3	0.17165	0.869216	A
F7	-0.0025	0.212037	A
F9	0.061386	0.349013	A
FA2H	-0.07379	0.141535	A
FAAH	0.087662	0.194642	A
FAAH2	-0.01698	0.129473	A
FADS1	-0.05654	0.626518	A
FADS2	-0.03671	0.883127	A
FADS3	-0.30005	2.30138	A
FADS6	0.10727	0.712064	A
FAH	-0.29968	1.515	A
FAHD1	-0.27147	1.05151	A
FAHD2A	-0.13022	0.859995	A
FAHD2B	-0.06371	0.47736	A
FAM105A	-0.06728	0.326564	A
FAM135B	-0.45192	2.09748	A
FAP	0.076848	0.223437	A
FAR1	0.040786	0.283304	A
FAR2	0.19851	0.97086	A
FASN	-0.23015	1.1271	A
FASTK	0.033007	0.366663	A
FAXDC2	-0.02468	0.211118	A
FBP1	0.31953	1.84977	A
FBP2	0.27897	1.35487	A
FBXO17	0.071669	0.292515	A
FBXO44	-0.15485	0.754241	A
FBXW9	0.17316	1.02313	A
FDFT1	0.2781	1.70606	A
FDPS	0.51126	3.17254	A
FDX1	0.20969	0.654509	A
FDXR	-0.1054	0.566006	A
FECH	0.37537	1.60326	A
FER	0.14683	0.767639	A
FES	-0.24692	1.3969	A
FFAR1	0.14045	0.560005	A
FFAR2	0.039583	0.073395	A
FFAR3	-0.25511	1.42599	A
FGFR1	0.081346	0.406304	A
FGFR2	0.14435	0.692761	A
FGFR3	0.056705	0.134908	A
FGFR4	-0.02853	0.179549	A
FGL2	0.10114	0.351035	A
FGR	0.007747	0.143319	A
FH	0.38745	1.95538	A
FHIT	0.2171	1.20761	A
FIG4	0.075039	0.48979	A
FIGN	-0.18075	0.888401	A
FIGNL1	-0.17827	1.03666	A
FKBP1A	-0.02274	0.269218	A
FKBP2	-0.30577	1.29149	A
FKBP5	-0.12082	0.761753	A
FLAD1	-0.0689	0.370835	A
FLT1	0.094064	0.274448	A
FLT3	0.11231	0.493887	A
FLT4	-0.07547	0.233045	A
FLVCR1	-0.02598	0.622057	A
FLVCR2	-0.04365	0.3272	A
FMO1	-0.02303	0.068166	A
FMO2	0.075925	0.218798	A
FMO3	0.11667	0.663	A
FMO4	0.027375	0.26556	A
FMO5	0.018894	0.514705	A
FMR1	0.2626	1.83068	A
FN3K	-0.1095	0.322749	A
FN3KRP	-0.12252	0.544348	A
FNTA	-0.03412	0.058658	A
FNTB	0.8438	3.9006	A
FOLH1	0.23138	1.46085	A
FOLR1	-0.24306	1.3263	A
FOLR2	-0.14866	0.585628	A
FOLR3	-0.09194	0.386137	A
FOXRED1	-0.00179	0.117612	A
FOXRED2	0.12878	0.892756	A
FPGS	3.5857	6.00441	A
FPGT	0.048547	0.323517	A
FPR1	-0.28264	1.93196	A
FPR2	0.010137	0.248121	A
FPR3	-0.094	0.386454	A
FRK	0.003363	0.136136	A
FRRS1	0.01618	0.135026	A
FSHR	-0.05394	0.090985	A
FTCD	-0.29987	1.57091	A
FTO	-0.38865	2.32145	A
FTSJ1	0.18996	1.05921	A
FUCA1	0.033647	0.106294	A
FUCA2	-0.12211	0.452545	A
FUK	-0.03019	0.226484	A
FURIN	-0.29065	1.01736	A
FUT1	-0.13437	0.515373	A
FUT10	0.11461	0.692076	A
FUT11	-0.02547	0.217506	A
FUT2	-0.04546	0.502214	A
FUT3	0.071715	0.12845	A
FUT4	-0.01351	0.448538	A
FUT5	-0.00386	0.376089	A
FUT6	-0.04153	0.117646	A
FUT7	-0.07675	0.182494	A
FUT8	-0.04446	0.334738	A
FUT9	0.089251	0.396953	A
FXR2	0.083822	0.477008	A
FXYD1	-0.09013	0.65604	A
FXYD2	-0.17087	0.73471	A
FXYD3	-0.11721	0.505261	A
FXYD4	0.066894	0.486436	A
FXYD5	0.11505	0.686956	A
FXYD6	-0.01834	0.675697	A
FXYD7	-0.02954	0.472331	A
FYN	0.024682	0.070213	A
FZD1	-0.07283	0.369674	A
FZD10	0.10358	0.488933	A
FZD2	-0.35487	1.25411	A
FZD3	0.15108	1.16576	A
FZD4	-0.10603	0.404945	A
FZD5	-0.0225	0.105811	A
FZD6	-0.10088	0.493427	A
FZD7	-0.09733	0.504359	A
FZD8	-0.05589	0.291945	A
FZD9	0.041284	0.062678	A
G2E3	0.12245	0.382853	A
G3BP1	-0.57596	3.47165	A
G6PC	-0.08478	0.201861	A
G6PC2	-0.10862	0.441928	A
G6PC3	0.1231	0.657064	A
G6PD	0.99763	6.00441	A
GAA	-0.17977	0.859461	A
GABBR1	-0.1791	0.867132	A
GABBR2	0.22278	1.36559	A
GABRA1	-0.04337	0.135708	A
GABRA2	0.44777	2.76412	A
GABRA3	0.19471	1.0146	A
GABRA4	0.23111	1.35625	A
GABRA5	-0.67623	6.00441	A
GABRA6	-0.14491	1.20451	A
GABRB1	0.31859	2.69244	A
GABRB2	-0.00396	0.359151	A
GABRB3	-0.30484	2.06674	A
GABRE	-0.04449	0.13679	A
GABRG1	0.32113	1.52971	A
GABRG2	-0.05644	0.240226	A
GABRG3	-0.22988	1.48572	A
GABRP	-0.09001	0.375048	A
GABRQ	0.19803	1.33127	A
GABRR1	0.012494	0.282246	A
GABRR2	-0.03539	0.259629	A
GABRR3	0.15551	0.817642	A
GAD1	-0.17504	1.59419	A
GAD2	0.09907	0.323782	A
GAK	0.35341	2.25552	A
GAL3ST1	-0.11153	0.548091	A
GAL3ST2	-0.08393	0.1078	A
GAL3ST3	-0.34576	1.82874	A
GAL3ST4	-0.07766	0.579714	A
GALC	0.10224	0.395742	A
GALE	-0.03548	0.160252	A
GALK1	0.30921	1.68876	A
GALK2	-0.19198	0.523618	A
GALM	-0.05984	0.499585	A
GALNS	0.02588	0.284615	A
GALNT1	-0.0935	0.159863	A
GALNT10	-0.00833	0.314635	A
GALNT11	0.081276	0.633558	A
GALNT12	0.066381	0.156008	A
GALNT13	-0.08227	0.605916	A
GALNT14	-0.01167	0.177394	A
GALNT15	-0.04791	0.67389	A
GALNT16	0.041255	0.432668	A
GALNT18	-0.02919	0.121789	A
GALNT2	0.06636	0.393124	A
GALNT3	0.03086	0.215112	A
GALNT4	-0.03487	0.095739	A
GALNT5	-0.00992	0.247813	A
GALNT6	-0.0268	0.327034	A
GALNT7	0.087718	0.164303	A
GALNT8	-0.07927	0.348083	A
GALNT9	0.040509	0.168393	A
GALNTL5	-0.11194	0.525492	A
GALNTL6	0.009371	0.122416	A
GALR1	0.067999	0.413019	A
GALR2	0.19202	0.94382	A
GALR3	-0.05702	0.122208	A
GALT	0.19924	1.03978	A
GAMT	-0.07106	0.575625	A
GANAB	-0.62399	3.4591	A
GANC	-0.01656	0.184529	A
GAPDH	0.3959	1.71869	A
GAPDHS	-0.02475	0.073647	A
GAR1	0.36677	1.74184	A
GART	1.4057	6.00441	A
GATC	0.17593	0.846643	A
GATM	-0.2471	1.9161	A
GBA	0.059957	0.481591	A
GBA2	0.026002	0.102148	A
GBA3	-0.00122	0.181464	A
GBE1	0.031561	0.34592	A
GBGT1	0.050051	0.11837	A
GCAT	0.069527	0.241451	A
GCDH	0.20009	1.0296	A
GCGR	-0.00366	0.048031	A
GCH1	0.057141	0.342113	A
GCK	-0.0642	0.21795	A
GCLC	-0.26935	1.18311	A
GCLM	0.065575	0.450298	A
GCNT1	0.12891	0.831355	A
GCNT2	-0.12376	0.597825	A
GCNT3	-0.06133	0.109087	A
GCNT4	0.095739	0.595423	A
GCNT7	0.015203	0.347435	A
GCSH	-0.04494	0.386074	A
GDA	0.22539	1.15433	A
GDE1	0.09672	0.529046	A
GDPD1	-0.12074	0.360195	A
GDPD2	0.12768	0.577656	A
GDPD3	-0.30582	2.17184	A
GDPD4	0.088932	0.472499	A
GDPD5	-0.2711	1.62512	A
GEM	0.037182	0.115669	A
GEN1	-0.62905	3.59448	A
GFOD1	-0.17716	0.855987	A
GFOD2	0.096302	1.01074	A
GFPT1	-0.18248	0.880777	A
GFPT2	-0.08337	0.583426	A
GGCT	0.14107	1.07609	A
GGCX	0.027459	0.053229	A
GGH	0.14533	0.562249	A
GGPS1	-0.07878	0.266666	A
GGT1	-0.02304	0.219985	A
GGT2	0.069781	0.283054	A
GGT5	-0.03378	0.087241	A
GGT6	-0.12718	0.618091	A
GGT7	0.072777	0.364697	A
GGTLC1	-0.02674	0.06085	A
GGTLC2	-0.07485	0.300041	A
GHRHR	-0.05619	0.40304	A
GHSR	0.086922	0.423428	A
GIPR	-0.23961	1.31631	A
GK	0.10493	0.781438	A
GK2	0.17267	0.738095	A
GK5	0.072166	0.274154	A
GLA	0.091637	0.444543	A
GLB1	-0.00701	0.237749	A
GLB1L2	0.047899	0.404107	A
GLB1L3	-0.09033	0.669039	A
GLCE	-0.18344	0.901045	A
GLDC	0.16302	0.77757	A
GLO1	-0.10683	0.407213	A
GLOD5	0.17957	1.00396	A
GLP1R	-0.29925	2.01518	A
GLP2R	0.027796	0.561268	A
GLRA1	0.066688	0.333398	A
GLRA2	0.040436	0.154834	A
GLRA3	0.14403	0.882696	A
GLRA4	0.015509	0.298311	A
GLRB	0.15242	1.03012	A
GLRX	-0.00707	0.434388	A
GLRX2	-0.13544	0.548352	A
GLRX3	0.34624	2.95094	A
GLRX5	-0.00036	0.385535	A
GLS	-0.03572	0.442336	A
GLS2	0.17908	0.826435	A
GLT1D1	0.023362	0.130205	A
GLT6D1	-0.06607	0.117891	A
GLT8D1	0.003644	0.063577	A
GLT8D2	-0.02424	0.3036	A
GLUD1	0.19464	1.21328	A
GLUD2	0.16367	1.58249	A
GLUL	0.41465	1.33749	A
GLYAT	-0.301	1.83003	A
GLYATL1	-0.25833	1.86704	A
GLYATL2	-0.03833	0.183832	A
GLYCTK	-0.04514	0.2635	A
GLYR1	-0.27541	2.98864	A
GMDS	-0.00745	0.206098	A
GMPPA	0.1112	0.333557	A
GMPPB	-0.27751	0.662441	A
GMPR	-0.07894	0.602129	A
GMPR2	-0.12884	0.817243	A
GMPS	0.22155	0.703708	A
GNE	0.29145	1.96401	A
GNMT	-0.08974	0.113475	A
GNPAT	-0.04066	0.177937	A
GNPDA1	-0.16792	1.58991	A
GNPDA2	0.31108	1.72667	A
GNPNAT1	0.03903	0.44236	A
GNPTAB	0.15197	0.793363	A
GNPTG	-0.11073	0.787786	A
GNRHR	0.23707	1.46077	A
GNS	0.0601	0.377537	A
GOT1	0.16958	0.868831	A
GOT1L1	0.027753	0.123032	A
GOT2	-0.35268	1.72691	A
GPAA1	-0.25817	2.00829	A
GPAM	0.009398	0.110205	A
GPAT2	-0.17477	1.04686	A
GPAT3	0.070364	0.234808	A
GPAT4	0.027013	0.315271	A
GPBAR1	-0.13673	0.750826	A
GPD1	0.089671	0.292362	A
GPD1L	0.076783	0.389702	A
GPD2	0.032064	0.229038	A
GPI	0.80144	6.00441	A
GPLD1	0.088976	0.634325	A
GPM6A	0.024402	0.639577	A
GPR1	-0.03162	0.096574	A
GPR101	-0.06563	0.163069	A
GPR107	0.031702	0.166006	A
GPR108	0.10567	0.360673	A
GPR119	-0.1383	0.915602	A
GPR12	0.005836	0.235092	A
GPR132	0.063305	0.237209	A
GPR135	0.032773	0.509761	A
GPR137	-0.44237	2.41725	A
GPR139	-0.04487	0.186839	A
GPR141	0.084257	0.314187	A
GPR142	0.081642	0.346305	A
GPR143	0.062898	0.276019	A
GPR146	-0.05322	0.35803	A
GPR148	-0.0809	0.887395	A
GPR149	0.33978	1.94823	A
GPR15	0.18746	0.557787	A
GPR150	-0.23901	1.29482	A
GPR151	-0.26559	1.50397	A
GPR152	-0.16459	1.03051	A
GPR153	-0.05479	0.404239	A
GPR155	-0.23045	2.13641	A
GPR156	0.12508	0.487316	A
GPR157	-0.03347	0.315002	A
GPR158	0.035879	0.191242	A
GPR160	0.051441	0.33661	A
GPR161	0.14432	0.497027	A
GPR162	-0.14405	0.817614	A
GPR17	-0.19262	0.94962	A
GPR171	0.15204	0.849981	A
GPR173	0.14866	0.682835	A
GPR174	0.001324	0.540532	A
GPR176	-0.20553	1.98502	A
GPR179	-0.2087	0.669485	A
GPR18	-0.11501	0.329587	A
GPR182	-0.047	0.6495	A
GPR183	-0.20515	0.955186	A
GPR19	0.002944	0.120778	A
GPR20	-0.35892	3.15254	A
GPR21	-0.00195	0.059165	A
GPR25	-0.03838	0.974162	A
GPR26	-0.07489	0.452693	A
GPR27	-0.07694	0.121231	A
GPR3	-0.11469	0.436744	A
GPR31	-0.31516	1.54151	A
GPR32	0.12033	0.578676	A
GPR33	0.088693	0.272467	A
GPR34	0.052422	0.307391	A
GPR35	0.016647	0.19304	A
GPR37	-0.11347	0.571768	A
GPR37L1	-0.00403	0.078173	A
GPR39	-0.15112	1.44909	A
GPR4	0.1019	0.413109	A
GPR42	0.095175	0.521073	A
GPR45	-0.32612	2.80601	A
GPR50	0.1183	0.419451	A
GPR52	0.084033	0.295429	A
GPR55	0.043856	0.689625	A
GPR6	-0.02265	0.130211	A
GPR61	0.085865	0.331428	A
GPR62	-0.06145	0.163898	A
GPR63	-0.12295	0.50969	A
GPR65	0.02871	0.105097	A
GPR68	-0.04667	0.134943	A
GPR75	0.01168	0.054216	A
GPR78	-0.01934	0.050249	A
GPR82	0.15473	0.757881	A
GPR83	-0.14529	0.789681	A
GPR84	0.091336	0.571898	A
GPR85	0.10558	0.634549	A
GPR87	0.079772	0.473661	A
GPR88	0.016668	0.264585	A
GPRC5A	0.103	0.310682	A
GPRC5B	0.097462	0.445596	A
GPRC5C	0.10067	0.51066	A
GPRC5D	-0.11483	0.366299	A
GPRC6A	-0.02493	0.113357	A
GPT	-0.08971	0.417971	A
GPT2	0.053077	0.284732	A
GPX1	0.083293	0.270876	A
GPX2	0.024476	0.322685	A
GPX3	0.000587	0.427663	A
GPX4	0.18481	0.791209	A
GPX5	-0.13782	0.685164	A
GPX6	-0.10134	0.238922	A
GPX7	0.092236	0.300657	A
GPX8	0.030288	0.384576	A
GRHPR	-0.08508	0.44499	A
GRIA1	-0.04284	0.256443	A
GRIA2	0.097601	0.330153	A
GRIA3	0.059929	0.357516	A
GRIA4	0.01329	0.181049	A
GRID1	0.02681	0.337563	A
GRID2	0.11051	0.529017	A
GRIK1	0.057363	0.277087	A
GRIK2	0.02286	0.061405	A
GRIK3	0.055364	0.420788	A
GRIK4	0.025043	0.138388	A
GRIK5	0.076077	0.633783	A
GRIN1	0.11432	0.771523	A
GRIN2A	0.05206	0.345487	A
GRIN2B	0.059945	0.242885	A
GRIN2C	0.21147	1.05345	A
GRIN2D	-0.03098	0.264697	A
GRIN3A	0.1244	0.397061	A
GRIN3B	0.032801	0.343289	A
GRINA	-0.00458	0.345246	A
GRK1	-0.05798	0.484603	A
GRK2	-0.18771	1.82754	A
GRK3	0.080325	0.344631	A
GRK4	0.11709	0.871956	A
GRK5	-0.12405	0.785686	A
GRK6	-0.00984	0.329801	A
GRK7	-0.05682	0.152649	A
GRM1	0.005585	0.289891	A
GRM2	0.024512	0.277341	A
GRM3	0.055702	0.158547	A
GRM4	-0.10131	0.317277	A
GRM5	-0.09653	0.560367	A
GRM6	-0.07882	0.355916	A
GRM7	0.046125	0.403876	A
GRM8	-0.08925	0.468266	A
GRPR	0.052057	0.278362	A
GRXCR1	0.46786	2.78246	A
GRXCR2	-0.34284	2.95715	A
GSK3A	0.30865	1.44694	A
GSK3B	0.42567	2.89215	A
GSR	0.054858	0.087417	A
GSS	-0.02249	0.198747	A
GSTA1	-0.08459	0.40605	A
GSTA2	0.005395	0.331158	A
GSTA3	-0.1368	0.771805	A
GSTA4	-0.12183	0.456491	A
GSTA5	-0.22871	1.20365	A
GSTK1	-0.06895	0.121513	A
GSTM1	0.17925	2.08853	A
GSTM2	-0.07493	0.315316	A
GSTM3	0.12722	0.519289	A
GSTM4	0.10425	0.703335	A
GSTM5	-0.01257	0.076455	A
GSTO1	-0.16232	1.01622	A
GSTO2	0.040161	0.198891	A
GSTP1	-0.04493	0.528298	A
GSTT2	-0.01594	0.505567	A
GSTT2B	-0.06032	0.198699	A
GSTZ1	0.15211	0.809556	A
GTDC1	0.005567	0.360872	A
GTF2B	0.10158	0.09772	A
GTF3C4	-0.30759	1.65449	A
GUCY1A2	-0.07662	0.483742	A
GUCY1A3	0.19709	1.79177	A
GUCY1B3	0.048623	0.38214	A
GUCY2C	-0.0407	0.146478	A
GUCY2D	0.078082	0.342915	A
GUCY2F	0.10599	0.408657	A
GUK1	1.1635	4.06991	A
GUSB	-0.1396	0.698146	A
GXYLT1	-0.03781	0.546116	A
GXYLT2	0.018195	0.092551	A
GYG1	0.16018	0.697669	A
GYG2	0.085564	0.541211	A
GYS1	0.14967	0.760876	A
GYS2	0.028982	0.250109	A
GZMA	0.072359	0.320318	A
GZMB	-0.18	0.778325	A
GZMH	0.010121	0.090412	A
GZMK	-0.08541	0.667905	A
GZMM	0.062462	0.201577	A
H2AFZ	-1.103	6.00441	A
H6PD	-0.04431	0.481341	A
HAAO	0.10457	0.349595	A
HABP2	-0.08978	0.504886	A
HACE1	0.20517	1.09599	A
HACL1	-0.01074	0.218597	A
HADH	-0.03344	0.33112	A
HADHA	0.075312	0.440476	A
HADHB	0.1806	0.743788	A
HAGH	0.006018	0.04668	A
HAGHL	0.024663	0.185892	A
HAL	-0.06123	0.162393	A
HAO1	0.25041	1.45671	A
HAO2	0.10248	0.43531	A
[truncated: 18,385 more rows]
