# Supplementary material for: N6-methyladenosine in DNA promotes genome stability
Source: bioRxiv preprint, doi:10.1101/2024.07.20.604187, version 2 (2025-01-09)
Supplement: Supplemental Table 2 [file 604187_file04.xlsx]

## Sheet: All data
Protein IDs	Majority protein IDs	Peptide counts (all)	Peptide counts (razor+unique)	Peptide counts (unique)	Protein names	Gene names	Fasta headers	Number of proteins	Peptides	Razor + unique peptides	Unique peptides	Peptides UNGKO Clone 1_DMSO_IGG	Peptides UNGKO Clone 1_DMSO_UNG	Peptides UNGKO Clone 1_FLOX_IGG	Peptides UNGKO Clone 1_FLOX_UNG	Peptides UNGKO Clone 2_DMSO_IGG	Peptides UNGKO Clone 2_DMSO_UNG	Peptides UNGKO Clone 2_FLOX_IGG	Peptides UNGKO Clone 2_FLOX_UNG	Peptides UNG Clone 1_DMSO_IGG	Peptides UNG Clone 1_DMSO_UNG	Peptides UNG Clone 1_FLOX_IGG	Peptides UNG Clone 1_FLOX_UNG	Peptides UNG Clone 2_DMSO_IGG	Peptides UNG Clone 2_DMSO_UNG	Peptides UNG Clone 2_FLOX_IGG	Peptides UNG Clone 2_FLOX_UNG	Razor + unique peptides UNGKO Clone 1_DMSO_IGG	Razor + unique peptides UNGKO Clone 1_DMSO_UNG	Razor + unique peptides UNGKO Clone 1_FLOX_IGG	Razor + unique peptides UNGKO Clone 2_DMSO_UNG	Razor + unique peptides UNGKO Clone 2_FLOX_IGG	Razor + unique peptides UNG Clone 1_DMSO_UNG	Razor + unique peptides UNG Clone 2_DMSO_UNG	Razor + unique peptides UNGKO Clone 1_FLOX_UNG	Razor + unique peptides UNGKO Clone 2_DMSO_IGG	Razor + unique peptides UNGKO Clone 2_FLOX_UNG	Razor + unique peptides UNG Clone 1_DMSO_IGG	Razor + unique peptides UNG Clone 1_FLOX_UNG	Razor + unique peptides UNG Clone 2_FLOX_UNG	Razor + unique peptides UNG Clone 1_FLOX_IGG	Razor + unique peptides UNG Clone 2_DMSO_IGG	Razor + unique peptides UNG Clone 2_FLOX_IGG	Unique peptides UNGKO Clone 1_DMSO_IGG	Unique peptides UNGKO Clone 1_DMSO_UNG	Unique peptides UNGKO Clone 1_FLOX_IGG	Unique peptides UNGKO Clone 1_FLOX_UNG	Unique peptides UNGKO Clone 2_DMSO_IGG	Unique peptides UNGKO Clone 2_DMSO_UNG
Q15149	Q15149	60	60	58	Plectin	PLEC	sp|Q15149|PLEC_HUMAN Plectin OS=Homo sapiens OX=9606 GN=PLEC PE=1 SV=3	1	60	60	58	0	0	0	9	7	1	3	2	9	51	0	1	8	6	1	#DIV/0!	0	0	0	1	3	51	6	9	7	2	9	1	0	0	8	1	0	0	0	8	7	1
P46940;Q13576;Q86VI3	P46940	28;2;2	28;2;2	28;2;2	Ras GTPase-activating-like protein IQGAP1	IQGAP1	sp|P46940|IQGA1_HUMAN Ras GTPase-activating-like protein IQGAP1 OS=Homo sapiens OX=9606 GN=IQGAP1 PE=1 SV=1	3	28	28	28	0	3	1	6	0	3	0	3	0	17	0	15	0	3	1	#DIV/0!	0	3	1	3	0	17	3	6	0	3	0	15	3	0	0	2	0	3	1	6	0	3
Q86W92;Q8ND30	Q86W92	25;2	25;2	25;2	Liprin-beta-1	PPFIBP1	sp|Q86W92|LIPB1_HUMAN Liprin-beta-1 OS=Homo sapiens OX=9606 GN=PPFIBP1 PE=1 SV=2	2	25	25	25	0	9	0	4	1	3	0	3	0	15	0	14	0	6	1	#DIV/0!	0	9	0	3	0	15	6	4	1	3	0	14	6	0	0	1	0	9	0	4	1	3
P05783;CON__H-INV:HIT000015463	P05783	30;3	30;3	19;2	Keratin, type I cytoskeletal 18	KRT18	sp|P05783|K1C18_HUMAN Keratin, type I cytoskeletal 18 OS=Homo sapiens OX=9606 GN=KRT18 PE=1 SV=2	2	30	30	19	9	11	20	25	18	12	19	19	20	29	9	15	17	25	1	1.88889	9	11	20	12	19	29	25	25	18	19	20	15	4	9	17	11	5	10	14	17	11	9
P02545	P02545	19	19	19	Prelamin-A/C	LMNA	sp|P02545|LMNA_HUMAN Prelamin-A/C OS=Homo sapiens OX=9606 GN=LMNA PE=1 SV=1	1	19	19	19	1	1	0	5	7	4	0	0	1	12	0	14	0	3	1	#DIV/0!	1	1	0	4	0	12	3	5	7	0	1	14	2	0	0	2	1	1	0	5	7	4
O43175	O43175	18	18	18	D-3-phosphoglycerate dehydrogenase	PHGDH	sp|O43175|SERA_HUMAN D-3-phosphoglycerate dehydrogenase OS=Homo sapiens OX=9606 GN=PHGDH PE=1 SV=4	1	18	18	18	0	6	1	6	2	8	1	8	0	11	0	12	0	10	1	#DIV/0!	0	6	1	8	1	11	10	6	2	8	0	12	8	0	0	0	0	6	1	6	2	8
Q09666	Q09666	18	18	18	Neuroblast differentiation-associated protein AHNAK	AHNAK	sp|Q09666|AHNK_HUMAN Neuroblast differentiation-associated protein AHNAK OS=Homo sapiens OX=9606 GN=AHNAK PE=1 SV=2	1	18	18	18	0	0	0	1	13	0	3	0	1	4	2	2	0	1	1	0	0	0	0	0	3	4	1	1	13	0	1	2	1	2	0	1	0	0	0	1	13	0
P13051	P13051	17	17	17	Uracil-DNA glycosylase	UNG	sp|P13051|UNG_HUMAN Uracil-DNA glycosylase OS=Homo sapiens OX=9606 GN=UNG PE=1 SV=2	1	17	17	17	1	1	1	2	1	0	0	2	0	15	1	15	1	16	1	1	1	1	1	0	0	15	16	2	1	2	0	15	16	1	1	0	1	1	1	2	1	0
P06733;P13929;P09104	P06733	15;2;2	15;2;2	15;2;2	Alpha-enolase	ENO1	sp|P06733|ENOA_HUMAN Alpha-enolase OS=Homo sapiens OX=9606 GN=ENO1 PE=1 SV=2	3	15	15	15	1	0	1	1	13	1	4	3	3	4	0	1	1	0	1	#DIV/0!	1	0	1	1	4	4	0	1	13	3	3	1	1	0	1	3	1	0	1	1	13	1
Q9UJZ1	Q9UJZ1	14	14	14	Stomatin-like protein 2, mitochondrial	STOML2	sp|Q9UJZ1|STML2_HUMAN Stomatin-like protein 2, mitochondrial OS=Homo sapiens OX=9606 GN=STOML2 PE=1 SV=1	1	14	14	14	0	5	0	5	1	4	0	4	0	9	0	8	1	9	1	#DIV/0!	0	5	0	4	0	9	9	5	1	4	0	8	7	0	1	0	0	5	0	5	1	4
Q8IXT5	Q8IXT5	13	13	13	RNA-binding protein 12B	RBM12B	sp|Q8IXT5|RB12B_HUMAN RNA-binding protein 12B OS=Homo sapiens OX=9606 GN=RBM12B PE=1 SV=2	1	13	13	13	0	2	0	2	0	2	0	1	0	7	0	2	1	2	1	#DIV/0!	0	2	0	2	0	7	2	2	0	1	0	2	3	0	1	0	0	2	0	2	0	2
P14618;P30613	P14618	13;1	13;1	13;1	Pyruvate kinase PKM	PKM	sp|P14618|KPYM_HUMAN Pyruvate kinase PKM OS=Homo sapiens OX=9606 GN=PKM PE=1 SV=4	2	13	13	13	1	1	1	0	12	0	5	2	2	3	0	1	1	0	1	#DIV/0!	1	1	1	0	5	3	0	0	12	2	2	1	1	0	1	5	1	1	1	0	12	0
P13639;Q15029	P13639	13;1	13;1	13;1	Elongation factor 2	EEF2	sp|P13639|EF2_HUMAN Elongation factor 2 OS=Homo sapiens OX=9606 GN=EEF2 PE=1 SV=4	2	13	13	13	1	0	0	0	8	0	3	1	1	0	0	0	0	0	1	#DIV/0!	1	0	0	0	3	0	0	0	8	1	1	0	1	0	0	4	1	0	0	0	8	0
P10809	P10809	12	12	12	60 kDa heat shock protein, mitochondrial	HSPD1	sp|P10809|CH60_HUMAN 60 kDa heat shock protein, mitochondrial OS=Homo sapiens OX=9606 GN=HSPD1 PE=1 SV=2	1	12	12	12	2	1	3	1	9	1	6	3	1	5	1	2	0	1	1	0	2	1	3	1	6	5	1	1	9	3	1	2	1	1	0	4	2	1	3	1	9	1
P04406;O14556	P04406	12;1	12;1	12;1	Glyceraldehyde-3-phosphate dehydrogenase	GAPDH	sp|P04406|G3P_HUMAN Glyceraldehyde-3-phosphate dehydrogenase OS=Homo sapiens OX=9606 GN=GAPDH PE=1 SV=3	2	12	12	12	2	1	2	1	9	1	8	5	2	4	2	2	1	3	1	0.5	2	1	2	1	8	4	3	1	9	5	2	2	3	2	1	3	2	1	2	1	9	1
Q86V48	Q86V48	11	11	11	Leucine zipper protein 1	LUZP1	sp|Q86V48|LUZP1_HUMAN Leucine zipper protein 1 OS=Homo sapiens OX=9606 GN=LUZP1 PE=1 SV=2	1	11	11	11	0	0	0	1	0	0	0	0	0	8	1	5	0	1	1	0	0	0	0	0	0	8	1	1	0	0	0	5	0	1	0	0	0	0	0	1	0	0
P21333	P21333	11	11	11	Filamin-A	FLNA	sp|P21333|FLNA_HUMAN Filamin-A OS=Homo sapiens OX=9606 GN=FLNA PE=1 SV=4	1	11	11	11	0	0	0	0	9	0	0	1	1	4	0	1	0	1	1	#DIV/0!	0	0	0	0	0	4	1	0	9	1	1	1	0	0	0	0	0	0	0	0	9	0
P07355;A6NMY6	P07355;A6NMY6	11;8	11;8	11;8	Annexin A2	ANXA2	sp|P07355|ANXA2_HUMAN Annexin A2 OS=Homo sapiens OX=9606 GN=ANXA2 PE=1 SV=2;sp|A6NMY6|AXA2L_HUMAN Putative annexin A2-like protein OS=Homo sapiens OX=9606 GN=ANXA2P2 PE=5 SV=2	2	11	11	11	3	0	2	2	9	0	4	3	2	3	0	3	1	0	1	#DIV/0!	3	0	2	0	4	3	0	2	9	3	2	3	2	0	1	3	3	0	2	2	9	0
P11142;P54652	P11142	12;3	12;3	10;1	Heat shock cognate 71 kDa protein	HSPA8	sp|P11142|HSP7C_HUMAN Heat shock cognate 71 kDa protein OS=Homo sapiens OX=9606 GN=HSPA8 PE=1 SV=1	2	12	12	10	1	0	1	3	11	1	5	5	4	9	0	4	2	1	1	#DIV/0!	1	0	1	1	5	9	1	3	11	5	4	4	3	0	2	4	1	0	1	2	10	1
O43166	O43166	10	10	10	Signal-induced proliferation-associated 1-like protein 1	SIPA1L1	sp|O43166|SI1L1_HUMAN Signal-induced proliferation-associated 1-like protein 1 OS=Homo sapiens OX=9606 GN=SIPA1L1 PE=1 SV=4	1	10	10	10	1	1	1	2	1	2	1	1	2	8	2	5	1	1	1	0.5	1	1	1	2	1	8	1	2	1	1	2	5	1	2	1	1	1	1	1	2	1	2
P68363;Q9BQE3;Q71U36;P0DPH8;P0DPH7;P68366;Q6PEY2;Q9NY65;A6NHL2	P68363;Q9BQE3;Q71U36;P0DPH8;P0DPH7;P68366;Q6PEY2	10;10;10;8;8;6;6;3;2	10;10;10;8;8;6;6;3;2	10;10;10;8;8;6;6;3;2	Tubulin alpha-1B chain	TUBA1B	sp|P68363|TBA1B_HUMAN Tubulin alpha-1B chain OS=Homo sapiens OX=9606 GN=TUBA1B PE=1 SV=1;sp|Q9BQE3|TBA1C_HUMAN Tubulin alpha-1C chain OS=Homo sapiens OX=9606 GN=TUBA1C PE=1 SV=1;sp|Q71U36|TBA1A_HUMAN Tubulin alpha-1A chain OS=Homo sapiens OX=9606 GN=TUBA1A	9	10	10	10	1	1	1	1	4	2	1	5	4	7	1	2	3	4	1	3	1	1	1	2	1	7	4	1	4	5	4	2	3	1	3	2	1	1	1	1	4	2
P11021	P11021	11	10	10	78 kDa glucose-regulated protein	HSPA5	sp|P11021|BIP_HUMAN Endoplasmic reticulum chaperone BiP OS=Homo sapiens OX=9606 GN=HSPA5 PE=1 SV=2	1	11	10	10	0	0	0	4	8	0	4	1	3	7	1	5	0	0	1	0	0	0	0	0	3	6	0	3	7	0	2	5	0	1	0	3	0	0	0	3	7	0
P19474	P19474	10	10	10	E3 ubiquitin-protein ligase TRIM21	TRIM21	sp|P19474|RO52_HUMAN E3 ubiquitin-protein ligase TRIM21 OS=Homo sapiens OX=9606 GN=TRIM21 PE=1 SV=1	1	10	10	10	5	2	3	1	4	2	3	1	0	3	2	4	3	2	1	1.5	5	2	3	2	3	3	2	1	4	1	0	4	1	2	3	10	5	2	3	1	4	2
O75369;Q14315	O75369	10;1	10;1	10;1	Filamin-B	FLNB	sp|O75369|FLNB_HUMAN Filamin-B OS=Homo sapiens OX=9606 GN=FLNB PE=1 SV=2	2	10	10	10	0	0	0	0	9	0	0	0	0	2	0	0	0	0	1	#DIV/0!	0	0	0	0	0	2	0	0	9	0	0	0	0	0	0	0	0	0	0	0	9	0
P19338	P19338	10	10	10	Nucleolin	NCL	sp|P19338|NUCL_HUMAN Nucleolin OS=Homo sapiens OX=9606 GN=NCL PE=1 SV=3	1	10	10	10	0	0	3	3	7	0	3	0	0	1	0	3	0	0	1	#DIV/0!	0	0	3	0	3	1	0	3	7	0	0	3	0	0	0	0	0	0	3	3	7	0
P32322	P32322	10	10	9	Pyrroline-5-carboxylate reductase 1, mitochondrial	PYCR1	sp|P32322|P5CR1_HUMAN Pyrroline-5-carboxylate reductase 1, mitochondrial OS=Homo sapiens OX=9606 GN=PYCR1 PE=1 SV=2	1	10	10	9	0	3	0	0	0	3	0	1	0	5	0	4	0	3	1	#DIV/0!	0	3	0	3	0	5	3	0	0	1	0	4	4	0	0	0	0	2	0	0	0	2
P14625;Q58FF3	P14625	10;2	9;2	9;2	Endoplasmin	HSP90B1	sp|P14625|ENPL_HUMAN Endoplasmin OS=Homo sapiens OX=9606 GN=HSP90B1 PE=1 SV=1	2	10	9	9	0	1	1	1	8	1	2	2	2	1	3	3	1	0	1	0.333333	0	0	1	1	1	0	0	0	7	1	1	2	1	2	0	1	0	0	1	0	7	1
P08238;Q58FF7	P08238	18;8	18;8	8;4	Heat shock protein HSP 90-beta	HSP90AB1	sp|P08238|HS90B_HUMAN Heat shock protein HSP 90-beta OS=Homo sapiens OX=9606 GN=HSP90AB1 PE=1 SV=4	2	18	18	8	2	1	2	3	17	2	9	5	4	9	2	4	4	2	1	2	2	1	2	2	9	9	2	3	17	5	4	4	3	2	4	10	0	0	0	0	7	1
Q86V81	Q86V81	8	8	8	THO complex subunit 4	ALYREF	sp|Q86V81|THOC4_HUMAN THO complex subunit 4 OS=Homo sapiens OX=9606 GN=ALYREF PE=1 SV=3	1	8	8	8	0	5	0	3	0	2	0	4	0	7	0	4	0	4	1	#DIV/0!	0	5	0	2	0	7	4	3	0	4	0	4	4	0	0	0	0	5	0	3	0	2
P15924	P15924	8	8	8	Desmoplakin	DSP	sp|P15924|DESP_HUMAN Desmoplakin OS=Homo sapiens OX=9606 GN=DSP PE=1 SV=3	1	8	8	8	1	0	0	0	0	0	0	1	0	5	0	1	3	0	1	#DIV/0!	1	0	0	0	0	5	0	0	0	1	0	1	0	0	3	1	1	0	0	0	0	0
P60174	P60174	7	7	7	Triosephosphate isomerase	TPI1	sp|P60174|TPIS_HUMAN Triosephosphate isomerase OS=Homo sapiens OX=9606 GN=TPI1 PE=1 SV=3	1	7	7	7	1	0	0	0	5	1	3	1	1	1	0	2	0	0	1	#DIV/0!	1	0	0	1	3	1	0	0	5	1	1	2	1	0	0	2	1	0	0	0	5	1
Q01082	Q01082	7	7	7	Spectrin beta chain, non-erythrocytic 1	SPTBN1	sp|Q01082|SPTB2_HUMAN Spectrin beta chain, non-erythrocytic 1 OS=Homo sapiens OX=9606 GN=SPTBN1 PE=1 SV=2	1	7	7	7	0	0	0	0	6	0	0	0	0	0	0	0	0	1	1	#DIV/0!	0	0	0	0	0	0	1	0	6	0	0	0	0	0	0	0	0	0	0	0	6	0
P07900;Q14568;Q58FF6;Q58FG0;Q92538	P07900	14;4;3;2;1	6;2;0;0;0	6;2;0;0;0	Heat shock protein HSP 90-alpha	HSP90AA1	sp|P07900|HS90A_HUMAN Heat shock protein HSP 90-alpha OS=Homo sapiens OX=9606 GN=HSP90AA1 PE=1 SV=5	5	14	6	6	3	0	2	3	13	1	6	6	2	7	1	4	3	2	1	3	1	0	0	0	2	1	0	1	5	2	0	1	0	0	0	2	1	0	0	1	5	0
P68104;Q5VTE0	P68104;Q5VTE0	11;11	11;11	6;6	Elongation factor 1-alpha 1	EEF1A1	sp|P68104|EF1A1_HUMAN Elongation factor 1-alpha 1 OS=Homo sapiens OX=9606 GN=EEF1A1 PE=1 SV=1;sp|Q5VTE0|EF1A3_HUMAN Putative elongation factor 1-alpha-like 3 OS=Homo sapiens OX=9606 GN=EEF1A1P5 PE=5 SV=1	2	11	11	6	1	1	2	1	10	1	6	4	3	5	3	1	1	2	1	0.333333	1	1	2	1	6	5	2	1	10	4	3	1	2	3	1	4	1	0	2	1	6	0
P01857;P0DOX5;P01860;P01859;P01861	P01857;P0DOX5;P01860	6;6;5;2;2	6;6;5;2;2	6;6;5;2;2	Ig gamma-1 chain C region	IGHG1	sp|P01857|IGHG1_HUMAN Immunoglobulin heavy constant gamma 1 OS=Homo sapiens OX=9606 GN=IGHG1 PE=1 SV=1;sp|P0DOX5|IGG1_HUMAN Immunoglobulin gamma-1 heavy chain OS=Homo sapiens OX=9606 PE=1 SV=2;sp|P01860|IGHG3_HUMAN Immunoglobulin heavy constant gamma 3 OS=	5	6	6	6	2	2	2	2	1	2	3	2	1	4	2	3	3	2	1	1.5	2	2	2	2	3	4	2	2	1	2	1	3	2	2	3	4	2	2	2	2	1	2
Q96C36	Q96C36	7	6	6	Pyrroline-5-carboxylate reductase 2	PYCR2	sp|Q96C36|P5CR2_HUMAN Pyrroline-5-carboxylate reductase 2 OS=Homo sapiens OX=9606 GN=PYCR2 PE=1 SV=1	1	7	6	6	0	2	0	1	0	1	0	0	0	4	0	3	0	1	1	#DIV/0!	0	1	0	0	0	3	1	1	0	0	0	3	2	0	0	0	0	1	0	1	0	0
P63104	P63104	7	7	6	14-3-3 protein zeta/delta	YWHAZ	sp|P63104|1433Z_HUMAN 14-3-3 protein zeta/delta OS=Homo sapiens OX=9606 GN=YWHAZ PE=1 SV=1	1	7	7	6	1	1	0	2	7	1	1	0	1	3	1	1	1	2	1	1	1	1	0	1	1	3	2	2	7	0	1	1	2	1	1	1	1	1	0	2	6	1
P61247	P61247	6	6	6	40S ribosomal protein S3a	RPS3A	sp|P61247|RS3A_HUMAN 40S ribosomal protein S3a OS=Homo sapiens OX=9606 GN=RPS3A PE=1 SV=2	1	6	6	6	0	0	0	1	2	0	3	0	1	3	0	1	0	0	1	#DIV/0!	0	0	0	0	3	3	0	1	2	0	1	1	0	0	0	0	0	0	0	1	2	0
Q12996	Q12996	6	6	6	Cleavage stimulation factor subunit 3	CSTF3	sp|Q12996|CSTF3_HUMAN Cleavage stimulation factor subunit 3 OS=Homo sapiens OX=9606 GN=CSTF3 PE=1 SV=1	1	6	6	6	0	1	0	0	0	1	0	0	0	3	0	3	0	1	1	#DIV/0!	0	1	0	1	0	3	1	0	0	0	0	3	0	0	0	0	0	1	0	0	0	1
P62269	P62269	6	6	6	40S ribosomal protein S18	RPS18	sp|P62269|RS18_HUMAN 40S ribosomal protein S18 OS=Homo sapiens OX=9606 GN=RPS18 PE=1 SV=3	1	6	6	6	0	0	0	1	3	1	1	0	2	2	0	3	0	0	1	#DIV/0!	0	0	0	1	1	2	0	1	3	0	2	3	0	0	0	0	0	0	0	1	3	1
P04075	P04075	6	6	6	Fructose-bisphosphate aldolase A	ALDOA	sp|P04075|ALDOA_HUMAN Fructose-bisphosphate aldolase A OS=Homo sapiens OX=9606 GN=ALDOA PE=1 SV=2	1	6	6	6	0	0	0	0	6	0	2	1	0	1	0	1	0	0	1	#DIV/0!	0	0	0	0	2	1	0	0	6	1	0	1	0	0	0	1	0	0	0	0	6	0
P30101	P30101	6	6	6	Protein disulfide-isomerase A3	PDIA3	sp|P30101|PDIA3_HUMAN Protein disulfide-isomerase A3 OS=Homo sapiens OX=9606 GN=PDIA3 PE=1 SV=4	1	6	6	6	0	0	0	0	5	0	1	0	0	1	0	0	0	0	1	#DIV/0!	0	0	0	0	1	1	0	0	5	0	0	0	0	0	0	1	0	0	0	0	5	0
P52272	P52272	6	6	6	Heterogeneous nuclear ribonucleoprotein M	HNRNPM	sp|P52272|HNRPM_HUMAN Heterogeneous nuclear ribonucleoprotein M OS=Homo sapiens OX=9606 GN=HNRNPM PE=1 SV=3	1	6	6	6	0	0	0	1	5	0	0	1	1	1	0	1	0	1	1	#DIV/0!	0	0	0	0	0	1	1	1	5	1	1	1	0	0	0	1	0	0	0	1	5	0
P38646	P38646	6	6	6	Stress-70 protein, mitochondrial	HSPA9	sp|P38646|GRP75_HUMAN Stress-70 protein, mitochondrial OS=Homo sapiens OX=9606 GN=HSPA9 PE=1 SV=2	1	6	6	6	0	1	0	1	3	0	0	1	2	0	1	1	0	0	1	0	0	1	0	0	0	0	0	1	3	1	2	1	0	1	0	2	0	1	0	1	3	0
P00338;P07864;Q9BYZ2;Q6ZMR3	P00338	8;1;1;1	8;1;1;1	6;0;0;0	L-lactate dehydrogenase A chain	LDHA	sp|P00338|LDHA_HUMAN L-lactate dehydrogenase A chain OS=Homo sapiens OX=9606 GN=LDHA PE=1 SV=2	4	8	8	6	0	0	0	0	7	0	2	1	2	0	1	1	0	0	1	0	0	0	0	0	2	0	0	0	7	1	2	1	0	1	0	1	0	0	0	0	5	0
P29966	P29966	6	6	6	Myristoylated alanine-rich C-kinase substrate	MARCKS	sp|P29966|MARCS_HUMAN Myristoylated alanine-rich C-kinase substrate OS=Homo sapiens OX=9606 GN=MARCKS PE=1 SV=4	1	6	6	6	0	0	0	0	3	0	0	0	2	0	1	0	0	0	1	0	0	0	0	0	0	0	0	0	3	0	2	0	1	1	0	0	0	0	0	0	3	0
P60660;P14649	P60660	5;2	5;2	5;2	Myosin light polypeptide 6	MYL6	sp|P60660|MYL6_HUMAN Myosin light polypeptide 6 OS=Homo sapiens OX=9606 GN=MYL6 PE=1 SV=2	2	5	5	5	0	2	1	1	1	0	1	2	1	4	1	3	0	2	1	0	0	2	1	0	1	4	2	1	1	2	1	3	3	1	0	0	0	2	1	1	1	0
P23528	P23528	6	6	5	Cofilin-1	CFL1	sp|P23528|COF1_HUMAN Cofilin-1 OS=Homo sapiens OX=9606 GN=CFL1 PE=1 SV=3	1	6	6	5	1	1	0	1	5	0	4	3	1	4	1	1	1	1	1	1	1	1	0	0	4	4	1	1	5	3	1	1	1	1	1	2	1	1	0	1	5	0
P43243	P43243	5	5	5	Matrin-3	MATR3	sp|P43243|MATR3_HUMAN Matrin-3 OS=Homo sapiens OX=9606 GN=MATR3 PE=1 SV=2	1	5	5	5	0	1	0	2	0	0	0	1	0	3	0	4	0	1	1	#DIV/0!	0	1	0	0	0	3	1	2	0	1	0	4	0	0	0	0	0	1	0	2	0	0
P26373	P26373	5	5	5	60S ribosomal protein L13	RPL13	sp|P26373|RL13_HUMAN 60S ribosomal protein L13 OS=Homo sapiens OX=9606 GN=RPL13 PE=1 SV=4	1	5	5	5	1	0	0	2	1	1	4	2	0	3	0	1	1	0	1	#DIV/0!	1	0	0	1	4	3	0	2	1	2	0	1	1	0	1	2	1	0	0	2	1	1
P62805	P62805	5	5	5	Histone H4	HIST1H4A	sp|P62805|H4_HUMAN Histone H4 OS=Homo sapiens OX=9606 GN=HIST1H4A PE=1 SV=2	1	5	5	5	0	0	0	2	3	0	3	3	1	3	0	1	0	1	1	#DIV/0!	0	0	0	0	3	3	1	2	3	3	1	1	1	0	0	0	0	0	0	2	3	0
P67809;Q9Y2T7	P67809	6;1	6;1	5;0	Nuclease-sensitive element-binding protein 1	YBX1	sp|P67809|YBOX1_HUMAN Nuclease-sensitive element-binding protein 1 OS=Homo sapiens OX=9606 GN=YBX1 PE=1 SV=3	2	6	6	5	1	1	1	1	3	0	2	1	1	2	0	2	0	1	1	#DIV/0!	1	1	1	0	2	2	1	1	3	1	1	2	1	0	0	0	1	1	1	1	2	0
P22626	P22626	5	5	5	Heterogeneous nuclear ribonucleoproteins A2/B1	HNRNPA2B1	sp|P22626|ROA2_HUMAN Heterogeneous nuclear ribonucleoproteins A2/B1 OS=Homo sapiens OX=9606 GN=HNRNPA2B1 PE=1 SV=2	1	5	5	5	1	1	0	1	2	1	2	3	0	2	1	2	1	1	1	1	1	1	0	1	2	2	1	1	2	3	0	2	1	1	1	2	1	1	0	1	2	1
P62258	P62258	6	5	5	14-3-3 protein epsilon	YWHAE	sp|P62258|1433E_HUMAN 14-3-3 protein epsilon OS=Homo sapiens OX=9606 GN=YWHAE PE=1 SV=1	1	6	5	5	1	0	0	1	6	0	2	0	1	2	0	3	0	0	1	#DIV/0!	1	0	0	0	2	1	0	1	5	0	1	3	0	0	0	1	1	0	0	1	5	0
P61978	P61978	5	5	5	Heterogeneous nuclear ribonucleoprotein K	HNRNPK	sp|P61978|HNRPK_HUMAN Heterogeneous nuclear ribonucleoprotein K OS=Homo sapiens OX=9606 GN=HNRNPK PE=1 SV=1	1	5	5	5	0	0	0	0	3	1	1	1	0	1	0	1	0	0	1	#DIV/0!	0	0	0	1	1	1	0	0	3	1	0	1	2	0	0	0	0	0	0	0	3	1
P07737;CON__P02584	P07737	5;2	5;2	5;2	Profilin-1	PFN1	sp|P07737|PROF1_HUMAN Profilin-1 OS=Homo sapiens OX=9606 GN=PFN1 PE=1 SV=2	2	5	5	5	1	0	0	0	5	0	2	0	1	0	0	0	0	0	1	#DIV/0!	1	0	0	0	2	0	0	0	5	0	1	0	0	0	0	0	1	0	0	0	5	0
P35232	P35232	5	5	5	Prohibitin	PHB	sp|P35232|PHB_HUMAN Prohibitin OS=Homo sapiens OX=9606 GN=PHB PE=1 SV=1	1	5	5	5	0	0	0	0	0	1	0	1	0	0	0	1	0	1	1	#DIV/0!	0	0	0	1	0	0	1	0	0	1	0	1	2	0	0	0	0	0	0	0	0	1
P62937;F5H284;Q9Y536;P0DN26;A0A0B4J2A2;A0A075B767;A0A075B759;P0DN37	P62937	5;2;2;2;2;2;2;1	5;2;2;2;2;2;2;1	5;2;2;2;2;2;2;1	Peptidyl-prolyl cis-trans isomerase A	PPIA	sp|P62937|PPIA_HUMAN Peptidyl-prolyl cis-trans isomerase A OS=Homo sapiens OX=9606 GN=PPIA PE=1 SV=2	8	5	5	5	0	0	0	0	4	0	1	0	2	0	0	1	0	0	1	#DIV/0!	0	0	0	0	1	0	0	0	4	0	2	1	0	0	0	3	0	0	0	0	4	0
Q8TCU4	Q8TCU4	5	5	5	Alstrom syndrome protein 1	ALMS1	sp|Q8TCU4|ALMS1_HUMAN Alstrom syndrome protein 1 OS=Homo sapiens OX=9606 GN=ALMS1 PE=1 SV=4	1	5	5	5	0	0	0	0	0	0	0	0	0	0	0	5	0	0	1	#DIV/0!	0	0	0	0	0	0	0	0	0	0	0	5	0	0	0	0	0	0	0	0	0	0
P33778;Q99880;Q93079;Q99877;Q16778;P62807;P58876;O60814;Q5QNW6;P23527;Q99879;P57053;P06899;Q8N257;Q96A08	P33778;Q99880;Q93079;Q99877;Q16778;P62807;P58876;O60814;Q5QNW6;P23527;Q99879;P57053;P06899;Q8N257;Q96A08	4;4;4;4;4;4;4;4;4;4;4;4;4;3;3	4;4;4;4;4;4;4;4;4;4;4;4;4;3;3	4;4;4;4;4;4;4;4;4;4;4;4;4;3;3	Histone H2B type 1-B	HIST1H2BB	sp|P33778|H2B1B_HUMAN Histone H2B type 1-B OS=Homo sapiens OX=9606 GN=HIST1H2BB PE=1 SV=2;sp|Q99880|H2B1L_HUMAN Histone H2B type 1-L OS=Homo sapiens OX=9606 GN=HIST1H2BL PE=1 SV=3;sp|Q93079|H2B1H_HUMAN Histone H2B type 1-H OS=Homo sapiens OX=9606 GN=HIST1H	15	4	4	4	0	0	2	4	0	1	2	2	1	4	1	1	0	1	1	0	0	0	2	1	2	4	1	4	0	2	1	1	1	1	0	0	0	0	2	4	0	1
P62241	P62241	4	4	4	40S ribosomal protein S8	RPS8	sp|P62241|RS8_HUMAN 40S ribosomal protein S8 OS=Homo sapiens OX=9606 GN=RPS8 PE=1 SV=2	1	4	4	4	0	0	0	0	2	0	1	1	1	4	0	0	0	0	1	#DIV/0!	0	0	0	0	1	4	0	0	2	1	1	0	0	0	0	0	0	0	0	0	2	0
P62424	P62424	4	4	4	60S ribosomal protein L7a	RPL7A	sp|P62424|RL7A_HUMAN 60S ribosomal protein L7a OS=Homo sapiens OX=9606 GN=RPL7A PE=1 SV=2	1	4	4	4	0	0	0	0	2	0	0	1	1	4	0	0	0	1	1	#DIV/0!	0	0	0	0	0	4	1	0	2	1	1	0	0	0	0	0	0	0	0	0	2	0
Q99959	Q99959	4	4	4	Plakophilin-2	PKP2	sp|Q99959|PKP2_HUMAN Plakophilin-2 OS=Homo sapiens OX=9606 GN=PKP2 PE=1 SV=2	1	4	4	4	0	0	0	0	0	1	0	0	1	4	0	0	0	0	1	#DIV/0!	0	0	0	1	0	4	0	0	0	0	1	0	0	0	0	0	0	0	0	0	0	1
P0C0L4;P0C0L5	P0C0L4;P0C0L5	4;3	4;3	4;3	Complement C4-A	C4A	sp|P0C0L4|CO4A_HUMAN Complement C4-A OS=Homo sapiens OX=9606 GN=C4A PE=1 SV=2;sp|P0C0L5|CO4B_HUMAN Complement C4-B OS=Homo sapiens OX=9606 GN=C4B PE=1 SV=2	2	4	4	4	0	2	0	1	0	0	0	1	1	3	0	2	0	1	1	#DIV/0!	0	2	0	0	0	3	1	1	0	1	1	2	0	0	0	0	0	2	0	1	0	0
P05387	P05387	4	4	4	60S acidic ribosomal protein P2	RPLP2	sp|P05387|RLA2_HUMAN 60S acidic ribosomal protein P2 OS=Homo sapiens OX=9606 GN=RPLP2 PE=1 SV=1	1	4	4	4	0	0	0	0	0	0	1	2	1	3	0	0	0	0	1	#DIV/0!	0	0	0	0	1	3	0	0	0	2	1	0	0	0	0	0	0	0	0	0	0	0
P05388;Q8NHW5	P05388;Q8NHW5	4;4	4;4	4;4	60S acidic ribosomal protein P0	RPLP0	sp|P05388|RLA0_HUMAN 60S acidic ribosomal protein P0 OS=Homo sapiens OX=9606 GN=RPLP0 PE=1 SV=1;sp|Q8NHW5|RLA0L_HUMAN 60S acidic ribosomal protein P0-like OS=Homo sapiens OX=9606 GN=RPLP0P6 PE=5 SV=1	2	4	4	4	0	0	0	0	1	0	0	0	1	3	0	0	0	0	1	#DIV/0!	0	0	0	0	0	3	0	0	1	0	1	0	0	0	0	0	0	0	0	0	1	0
P08865	P08865	4	4	4	40S ribosomal protein SA	RPSA	sp|P08865|RSSA_HUMAN 40S ribosomal protein SA OS=Homo sapiens OX=9606 GN=RPSA PE=1 SV=4	1	4	4	4	1	0	0	0	3	0	1	1	0	3	0	1	0	0	1	#DIV/0!	1	0	0	0	1	3	0	0	3	1	0	1	0	0	0	1	1	0	0	0	3	0
P36578	P36578	4	4	4	60S ribosomal protein L4	RPL4	sp|P36578|RL4_HUMAN 60S ribosomal protein L4 OS=Homo sapiens OX=9606 GN=RPL4 PE=1 SV=5	1	4	4	4	0	0	0	0	2	0	1	1	0	3	0	0	0	0	1	#DIV/0!	0	0	0	0	1	3	0	0	2	1	0	0	0	0	0	0	0	0	0	0	2	0
P62753	P62753	4	4	4	40S ribosomal protein S6	RPS6	sp|P62753|RS6_HUMAN 40S ribosomal protein S6 OS=Homo sapiens OX=9606 GN=RPS6 PE=1 SV=1	1	4	4	4	0	0	0	0	2	0	0	0	0	3	0	0	0	0	1	#DIV/0!	0	0	0	0	0	3	0	0	2	0	0	0	0	0	0	0	0	0	0	0	2	0
Q9H0L4	Q9H0L4	6	6	4	Cleavage stimulation factor subunit 2 tau variant	CSTF2T	sp|Q9H0L4|CSTFT_HUMAN Cleavage stimulation factor subunit 2 tau variant OS=Homo sapiens OX=9606 GN=CSTF2T PE=1 SV=1	1	6	6	4	0	0	0	1	0	0	0	1	0	3	0	2	0	1	1	#DIV/0!	0	0	0	0	0	3	1	1	0	1	0	2	1	0	0	0	0	0	0	1	0	0
P14923	P14923	4	4	4	Junction plakoglobin	JUP	sp|P14923|PLAK_HUMAN Junction plakoglobin OS=Homo sapiens OX=9606 GN=JUP PE=1 SV=3	1	4	4	4	0	0	0	0	1	0	0	0	0	2	0	0	0	1	1	#DIV/0!	0	0	0	0	0	2	1	0	1	0	0	0	0	0	0	0	0	0	0	0	1	0
P27635;Q96L21	P27635;Q96L21	4;2	4;2	4;2	60S ribosomal protein L10	RPL10	sp|P27635|RL10_HUMAN 60S ribosomal protein L10 OS=Homo sapiens OX=9606 GN=RPL10 PE=1 SV=4;sp|Q96L21|RL10L_HUMAN 60S ribosomal protein L10-like OS=Homo sapiens OX=9606 GN=RPL10L PE=1 SV=3	2	4	4	4	0	0	0	0	2	1	1	0	1	2	0	2	0	1	1	#DIV/0!	0	0	0	1	1	2	1	0	2	0	1	2	0	0	0	2	0	0	0	0	2	1
P62280	P62280	4	4	4	40S ribosomal protein S11	RPS11	sp|P62280|RS11_HUMAN 40S ribosomal protein S11 OS=Homo sapiens OX=9606 GN=RPS11 PE=1 SV=3	1	4	4	4	0	0	0	0	3	0	1	0	0	2	0	1	1	0	1	#DIV/0!	0	0	0	0	1	2	0	0	3	0	0	1	0	0	1	1	0	0	0	0	3	0
Q04917	Q04917	5	4	4	14-3-3 protein eta	YWHAH	sp|Q04917|1433F_HUMAN 14-3-3 protein eta OS=Homo sapiens OX=9606 GN=YWHAH PE=1 SV=4	1	5	4	4	0	0	0	0	5	0	0	0	0	2	0	0	0	0	1	#DIV/0!	0	0	0	0	0	1	0	0	4	0	0	0	0	0	0	0	0	0	0	0	4	0
Q92974	Q92974	4	4	4	Rho guanine nucleotide exchange factor 2	ARHGEF2	sp|Q92974|ARHG2_HUMAN Rho guanine nucleotide exchange factor 2 OS=Homo sapiens OX=9606 GN=ARHGEF2 PE=1 SV=4	1	4	4	4	0	0	0	0	0	0	0	0	0	2	0	4	0	0	1	#DIV/0!	0	0	0	0	0	2	0	0	0	0	0	4	0	0	0	0	0	0	0	0	0	0
P28799	P28799	4	4	4	Granulins	GRN	sp|P28799|GRN_HUMAN Granulins OS=Homo sapiens OX=9606 GN=GRN PE=1 SV=2	1	4	4	4	2	1	1	1	2	1	1	1	1	1	1	2	1	1	1	1	2	1	1	1	1	1	1	1	2	1	1	2	1	1	1	2	2	1	1	1	2	1
P07910;O60812;B7ZW38;B2RXH8;P0DMR1	P07910;O60812;B7ZW38;B2RXH8;P0DMR1	4;4;4;4;4	4;4;4;4;4	4;4;4;4;4	Heterogeneous nuclear ribonucleoproteins C1/C2	HNRNPC	sp|P07910|HNRPC_HUMAN Heterogeneous nuclear ribonucleoproteins C1/C2 OS=Homo sapiens OX=9606 GN=HNRNPC PE=1 SV=4;sp|O60812|HNRC1_HUMAN Heterogeneous nuclear ribonucleoprotein C-like 1 OS=Homo sapiens OX=9606 GN=HNRNPCL1 PE=1 SV=1;sp|B7ZW38|HNRC3_HUMAN Hete	5	4	4	4	0	0	0	2	0	0	0	1	0	1	0	0	0	0	1	#DIV/0!	0	0	0	0	0	1	0	2	0	1	0	0	1	0	0	0	0	0	0	2	0	0
P24534	P24534	5	4	4	Elongation factor 1-beta	EEF1B2	sp|P24534|EF1B_HUMAN Elongation factor 1-beta OS=Homo sapiens OX=9606 GN=EEF1B2 PE=1 SV=3	1	5	4	4	0	0	0	0	4	0	0	0	0	1	0	1	0	0	1	#DIV/0!	0	0	0	0	0	0	0	0	4	0	0	0	0	0	0	0	0	0	0	0	4	0
P26641	P26641	4	4	4	Elongation factor 1-gamma	EEF1G	sp|P26641|EF1G_HUMAN Elongation factor 1-gamma OS=Homo sapiens OX=9606 GN=EEF1G PE=1 SV=3	1	4	4	4	2	0	1	0	1	1	2	0	0	1	0	0	1	0	1	#DIV/0!	2	0	1	1	2	1	0	0	1	0	0	0	0	0	1	0	2	0	1	0	1	1
P29692	P29692	5	5	4	Elongation factor 1-delta	EEF1D	sp|P29692|EF1D_HUMAN Elongation factor 1-delta OS=Homo sapiens OX=9606 GN=EEF1D PE=1 SV=5	1	5	5	4	0	0	0	0	4	0	2	0	0	1	0	2	0	0	1	#DIV/0!	0	0	0	0	2	1	0	0	4	0	0	2	0	0	0	2	0	0	0	0	4	0
P46781	P46781	4	4	4	40S ribosomal protein S9	RPS9	sp|P46781|RS9_HUMAN 40S ribosomal protein S9 OS=Homo sapiens OX=9606 GN=RPS9 PE=1 SV=3	1	4	4	4	1	0	0	0	2	1	3	2	1	1	0	0	0	1	1	#DIV/0!	1	0	0	1	3	1	1	0	2	2	1	0	1	0	0	0	1	0	0	0	2	1
P50990	P50990	4	4	4	T-complex protein 1 subunit theta	CCT8	sp|P50990|TCPQ_HUMAN T-complex protein 1 subunit theta OS=Homo sapiens OX=9606 GN=CCT8 PE=1 SV=4	1	4	4	4	1	0	1	1	4	0	0	0	0	1	0	0	0	0	1	#DIV/0!	1	0	1	0	0	1	0	1	4	0	0	0	0	0	0	1	1	0	1	1	4	0
P61604	P61604	4	4	4	10 kDa heat shock protein, mitochondrial	HSPE1	sp|P61604|CH10_HUMAN 10 kDa heat shock protein, mitochondrial OS=Homo sapiens OX=9606 GN=HSPE1 PE=1 SV=2	1	4	4	4	0	0	0	0	3	0	2	1	1	1	0	2	1	0	1	#DIV/0!	0	0	0	0	2	1	0	0	3	1	1	2	0	0	1	2	0	0	0	0	3	0
Q5T8D3	Q5T8D3	4	4	4	Acyl-CoA-binding domain-containing protein 5	ACBD5	sp|Q5T8D3|ACBD5_HUMAN Acyl-CoA-binding domain-containing protein 5 OS=Homo sapiens OX=9606 GN=ACBD5 PE=1 SV=1	1	4	4	4	0	0	0	2	0	0	0	1	0	1	0	3	0	0	1	#DIV/0!	0	0	0	0	0	1	0	2	0	1	0	3	1	0	0	0	0	0	0	2	0	0
P60842;Q14240	P60842;Q14240	4;2	4;2	4;2	Eukaryotic initiation factor 4A-I	EIF4A1	sp|P60842|IF4A1_HUMAN Eukaryotic initiation factor 4A-I OS=Homo sapiens OX=9606 GN=EIF4A1 PE=1 SV=1;sp|Q14240|IF4A2_HUMAN Eukaryotic initiation factor 4A-II OS=Homo sapiens OX=9606 GN=EIF4A2 PE=1 SV=2	2	4	4	4	0	1	1	0	3	0	1	1	0	0	0	0	0	0	1	#DIV/0!	0	1	1	0	1	0	0	0	3	1	0	0	1	0	0	0	0	1	1	0	3	0
P00558	P00558	4	4	4	Phosphoglycerate kinase 1	PGK1	sp|P00558|PGK1_HUMAN Phosphoglycerate kinase 1 OS=Homo sapiens OX=9606 GN=PGK1 PE=1 SV=3	1	4	4	4	0	0	0	0	4	0	0	0	1	0	0	0	0	0	1	#DIV/0!	0	0	0	0	0	0	0	0	4	0	1	0	0	0	0	0	0	0	0	0	4	0
P05455	P05455	4	4	4	Lupus La protein	SSB	sp|P05455|LA_HUMAN Lupus La protein OS=Homo sapiens OX=9606 GN=SSB PE=1 SV=2	1	4	4	4	0	0	0	1	3	0	0	0	0	0	0	1	0	0	1	#DIV/0!	0	0	0	0	0	0	0	1	3	0	0	1	0	0	0	1	0	0	0	1	3	0
P40926	P40926	4	4	4	Malate dehydrogenase, mitochondrial	MDH2	sp|P40926|MDHM_HUMAN Malate dehydrogenase, mitochondrial OS=Homo sapiens OX=9606 GN=MDH2 PE=1 SV=3	1	4	4	4	0	0	0	0	3	0	1	0	0	0	0	0	0	0	1	#DIV/0!	0	0	0	0	1	0	0	0	3	0	0	0	0	0	0	0	0	0	0	0	3	0
P55072	P55072	4	4	4	Transitional endoplasmic reticulum ATPase	VCP	sp|P55072|TERA_HUMAN Transitional endoplasmic reticulum ATPase OS=Homo sapiens OX=9606 GN=VCP PE=1 SV=4	1	4	4	4	0	0	0	0	4	0	0	0	0	0	0	0	0	0	1	#DIV/0!	0	0	0	0	0	0	0	0	4	0	0	0	0	0	0	0	0	0	0	0	4	0
P62826	P62826	4	4	4	GTP-binding nuclear protein Ran	RAN	sp|P62826|RAN_HUMAN GTP-binding nuclear protein Ran OS=Homo sapiens OX=9606 GN=RAN PE=1 SV=3	1	4	4	4	0	1	1	0	4	0	1	1	1	0	1	1	0	1	1	0	0	1	1	0	1	0	1	0	4	1	1	1	1	1	0	1	0	1	1	0	4	0
Q01469	Q01469	4	4	4	Fatty acid-binding protein, epidermal	FABP5	sp|Q01469|FABP5_HUMAN Fatty acid-binding protein 5 OS=Homo sapiens OX=9606 GN=FABP5 PE=1 SV=3	1	4	4	4	0	0	1	0	3	0	1	1	1	0	0	0	2	0	1	#DIV/0!	0	0	1	0	1	0	0	0	3	1	1	0	0	0	2	0	0	0	1	0	3	0
Q13813	Q13813	4	4	4	Spectrin alpha chain, non-erythrocytic 1	SPTAN1	sp|Q13813|SPTN1_HUMAN Spectrin alpha chain, non-erythrocytic 1 OS=Homo sapiens OX=9606 GN=SPTAN1 PE=1 SV=3	1	4	4	4	0	0	0	0	4	0	1	0	0	0	0	0	0	0	1	#DIV/0!	0	0	0	0	1	0	0	0	4	0	0	0	0	0	0	1	0	0	0	0	4	0
Q15181	Q15181	4	4	4	Inorganic pyrophosphatase	PPA1	sp|Q15181|IPYR_HUMAN Inorganic pyrophosphatase OS=Homo sapiens OX=9606 GN=PPA1 PE=1 SV=2	1	4	4	4	0	0	0	0	3	0	1	0	0	0	0	1	0	0	1	#DIV/0!	0	0	0	0	1	0	0	0	3	0	0	1	1	0	0	0	0	0	0	0	3	0
Q92945	Q92945	4	4	4	Far upstream element-binding protein 2	KHSRP	sp|Q92945|FUBP2_HUMAN Far upstream element-binding protein 2 OS=Homo sapiens OX=9606 GN=KHSRP PE=1 SV=4	1	4	4	4	0	0	0	0	4	0	1	0	0	0	0	0	0	0	1	#DIV/0!	0	0	0	0	1	0	0	0	4	0	0	0	0	0	0	0	0	0	0	0	4	0
P07437;Q9BVA1;Q13885;Q9H4B7;CON__ENSEMBL:ENSBTAP00000025008	P07437;Q9BVA1;Q13885	15;10;10;2;2	15;10;10;2;2	3;0;0;0;0	Tubulin beta chain	TUBB	sp|P07437|TBB5_HUMAN Tubulin beta chain OS=Homo sapiens OX=9606 GN=TUBB PE=1 SV=2;sp|Q9BVA1|TBB2B_HUMAN Tubulin beta-2B chain OS=Homo sapiens OX=9606 GN=TUBB2B PE=1 SV=1;sp|Q13885|TBB2A_HUMAN Tubulin beta-2A chain OS=Homo sapiens OX=9606 GN=TUBB2A PE=1 SV=	5	15	15	3	2	2	1	2	6	4	8	6	7	10	4	2	1	8	1	0.25	2	2	1	4	8	10	8	2	6	6	7	2	4	4	1	2	1	0	0	0	1	1
P68133;P68032;P62736;P63267	P68133;P68032;P62736;P63267	12;12;11;11	3;3;3;3	3;3;3;3	Actin, alpha skeletal muscle	ACTA1	sp|P68133|ACTS_HUMAN Actin, alpha skeletal muscle OS=Homo sapiens OX=9606 GN=ACTA1 PE=1 SV=1;sp|P68032|ACTC_HUMAN Actin, alpha cardiac muscle 1 OS=Homo sapiens OX=9606 GN=ACTC1 PE=1 SV=1;sp|P62736|ACTA_HUMAN Actin, aortic smooth muscle OS=Homo sapiens OX=9	4	12	3	3	2	1	5	4	9	2	6	6	7	6	3	5	3	5	1	1	0	0	0	0	0	0	0	0	1	0	0	0	0	0	0	2	0	0	0	0	1	0
P31947	P31947	4	3	3	14-3-3 protein sigma	SFN	sp|P31947|1433S_HUMAN 14-3-3 protein sigma OS=Homo sapiens OX=9606 GN=SFN PE=1 SV=1	1	4	3	3	1	0	0	1	4	0	0	0	0	3	0	3	1	0	1	#DIV/0!	1	0	0	0	0	2	0	1	3	0	0	3	0	0	1	0	1	0	0	1	3	0
P61353	P61353	3	3	3	60S ribosomal protein L27	RPL27	sp|P61353|RL27_HUMAN 60S ribosomal protein L27 OS=Homo sapiens OX=9606 GN=RPL27 PE=1 SV=2	1	3	3	3	0	0	0	0	1	0	1	1	0	3	0	0	0	0	1	#DIV/0!	0	0	0	0	1	3	0	0	1	1	0	0	0	0	0	0	0	0	0	0	1	0
P61981	P61981	5	4	3	14-3-3 protein gamma	YWHAG	sp|P61981|1433G_HUMAN 14-3-3 protein gamma OS=Homo sapiens OX=9606 GN=YWHAG PE=1 SV=2	1	5	4	3	0	1	0	0	1	0	0	1	0	2	0	3	0	0	1	#DIV/0!	0	1	0	0	0	1	0	0	0	1	0	3	0	0	0	0	0	0	0	0	0	0
Q99623	Q99623	3	3	3	Prohibitin-2	PHB2	sp|Q99623|PHB2_HUMAN Prohibitin-2 OS=Homo sapiens OX=9606 GN=PHB2 PE=1 SV=2	1	3	3	3	1	1	0	1	0	1	1	0	0	2	0	2	0	1	1	#DIV/0!	1	1	0	1	1	2	1	1	0	0	0	2	0	0	0	0	1	1	0	1	0	1
P07195	P07195	5	3	3	L-lactate dehydrogenase B chain	LDHB	sp|P07195|LDHB_HUMAN L-lactate dehydrogenase B chain OS=Homo sapiens OX=9606 GN=LDHB PE=1 SV=2	1	5	3	3	0	0	0	1	5	0	1	2	1	2	0	1	0	0	1	#DIV/0!	0	0	0	0	1	2	0	1	3	1	1	1	0	0	0	1	0	0	0	1	3	0
P0CG48;P0CG47;P62979;P62987	P0CG48;P0CG47;P62979;P62987	3;3;3;3	3;3;3;3	3;3;3;3	Polyubiquitin-C	UBC	sp|P0CG48|UBC_HUMAN Polyubiquitin-C OS=Homo sapiens OX=9606 GN=UBC PE=1 SV=3;sp|P0CG47|UBB_HUMAN Polyubiquitin-B OS=Homo sapiens OX=9606 GN=UBB PE=1 SV=1;sp|P62979|RS27A_HUMAN Ubiquitin-40S ribosomal protein S27a OS=Homo sapiens OX=9606 GN=RPS27A PE=1 SV=2	4	3	3	3	0	0	0	3	3	0	2	0	1	2	0	2	0	0	1	#DIV/0!	0	0	0	0	2	2	0	3	3	0	1	2	0	0	0	2	0	0	0	3	3	0
P39023;Q92901	P39023	3;1	3;1	3;1	60S ribosomal protein L3	RPL3	sp|P39023|RL3_HUMAN 60S ribosomal protein L3 OS=Homo sapiens OX=9606 GN=RPL3 PE=1 SV=2	2	3	3	3	0	0	0	0	1	0	1	1	1	2	0	0	0	1	1	#DIV/0!	0	0	0	0	1	2	1	0	1	1	1	0	0	0	0	1	0	0	0	0	1	0
P06744;CON__Q3ZBD7	P06744	3;1	3;1	3;1	Glucose-6-phosphate isomerase	GPI	sp|P06744|G6PI_HUMAN Glucose-6-phosphate isomerase OS=Homo sapiens OX=9606 GN=GPI PE=1 SV=4	2	3	3	3	0	0	0	0	3	0	0	1	1	1	0	0	0	0	1	#DIV/0!	0	0	0	0	0	1	0	0	3	1	1	0	1	0	0	0	0	0	0	0	3	0
P0DP25;P0DP24;P0DP23	P0DP25;P0DP24;P0DP23	3;3;3	3;3;3	3;3;3			sp|P0DP25|CALM3_HUMAN Calmodulin-3 OS=Homo sapiens OX=9606 GN=CALM3 PE=1 SV=1;sp|P0DP24|CALM2_HUMAN Calmodulin-2 OS=Homo sapiens OX=9606 GN=CALM2 PE=1 SV=1;sp|P0DP23|CALM1_HUMAN Calmodulin-1 OS=Homo sapiens OX=9606 GN=CALM1 PE=1 SV=1	3	3	3	3	1	1	1	1	2	1	2	1	1	1	1	1	2	1	1	2	1	1	1	1	2	1	1	1	2	1	1	1	2	1	2	1	1	1	1	1	2	1
P18124	P18124	3	3	3	60S ribosomal protein L7	RPL7	sp|P18124|RL7_HUMAN 60S ribosomal protein L7 OS=Homo sapiens OX=9606 GN=RPL7 PE=1 SV=1	1	3	3	3	0	0	0	1	1	0	1	2	0	1	0	0	0	0	1	#DIV/0!	0	0	0	0	1	1	0	1	1	2	0	0	0	0	0	0	0	0	0	1	1	0
P37837	P37837	3	3	3	Transaldolase	TALDO1	sp|P37837|TALDO_HUMAN Transaldolase OS=Homo sapiens OX=9606 GN=TALDO1 PE=1 SV=2	1	3	3	3	0	0	0	0	2	0	1	1	0	1	0	0	0	0	1	#DIV/0!	0	0	0	0	1	1	0	0	2	1	0	0	0	0	0	1	0	0	0	0	2	0
P39019	P39019	3	3	3	40S ribosomal protein S19	RPS19	sp|P39019|RS19_HUMAN 40S ribosomal protein S19 OS=Homo sapiens OX=9606 GN=RPS19 PE=1 SV=2	1	3	3	3	0	0	0	0	3	0	1	0	0	1	0	0	0	0	1	#DIV/0!	0	0	0	0	1	1	0	0	3	0	0	0	0	0	0	0	0	0	0	0	3	0
P46776	P46776	3	3	3	60S ribosomal protein L27a	RPL27A	sp|P46776|RL27A_HUMAN 60S ribosomal protein L27a OS=Homo sapiens OX=9606 GN=RPL27A PE=1 SV=2	1	3	3	3	0	0	0	0	1	0	1	2	0	1	0	0	0	0	1	#DIV/0!	0	0	0	0	1	1	0	0	1	2	0	0	0	0	0	1	0	0	0	0	1	0
P61254;Q9UNX3	P61254;Q9UNX3	3;3	3;3	3;3	60S ribosomal protein L26	RPL26	sp|P61254|RL26_HUMAN 60S ribosomal protein L26 OS=Homo sapiens OX=9606 GN=RPL26 PE=1 SV=1;sp|Q9UNX3|RL26L_HUMAN 60S ribosomal protein L26-like 1 OS=Homo sapiens OX=9606 GN=RPL26L1 PE=1 SV=1	2	3	3	3	0	0	0	0	2	0	2	0	0	1	0	1	0	0	1	#DIV/0!	0	0	0	0	2	1	0	0	2	0	0	1	0	0	0	0	0	0	0	0	2	0
P62249	P62249	3	3	3	40S ribosomal protein S16	RPS16	sp|P62249|RS16_HUMAN 40S ribosomal protein S16 OS=Homo sapiens OX=9606 GN=RPS16 PE=1 SV=2	1	3	3	3	0	0	0	0	2	0	0	1	0	1	0	0	0	1	1	#DIV/0!	0	0	0	0	0	1	1	0	2	1	0	0	0	0	0	0	0	0	0	0	2	0
P84243;P68431;Q71DI3;Q16695;Q6NXT2	P84243;P68431;Q71DI3;Q16695;Q6NXT2	3;2;2;2;2	3;2;2;2;2	3;2;2;2;2	Histone H3.3	H3F3A	sp|P84243|H33_HUMAN Histone H3.3 OS=Homo sapiens OX=9606 GN=H3F3A PE=1 SV=2;sp|P68431|H31_HUMAN Histone H3.1 OS=Homo sapiens OX=9606 GN=HIST1H3A PE=1 SV=2;sp|Q71DI3|H32_HUMAN Histone H3.2 OS=Homo sapiens OX=9606 GN=HIST2H3A PE=1 SV=3;sp|Q16695|H31T_HUMAN H	5	3	3	3	0	0	0	0	1	0	0	1	2	1	0	0	0	0	1	#DIV/0!	0	0	0	0	0	1	0	0	1	1	2	0	0	0	0	0	0	0	0	0	1	0
Q06830	Q06830	4	4	3	Peroxiredoxin-1	PRDX1	sp|Q06830|PRDX1_HUMAN Peroxiredoxin-1 OS=Homo sapiens OX=9606 GN=PRDX1 PE=1 SV=1	1	4	4	3	1	0	0	1	4	0	3	2	0	1	0	2	0	0	1	#DIV/0!	1	0	0	0	3	1	0	1	4	2	0	2	0	0	0	2	1	0	0	1	3	0
Q07020	Q07020	3	3	3	60S ribosomal protein L18	RPL18	sp|Q07020|RL18_HUMAN 60S ribosomal protein L18 OS=Homo sapiens OX=9606 GN=RPL18 PE=1 SV=2	1	3	3	3	0	0	0	0	2	0	1	1	0	1	0	0	0	0	1	#DIV/0!	0	0	0	0	1	1	0	0	2	1	0	0	0	0	0	0	0	0	0	0	2	0
Q15007	Q15007	3	3	3	Pre-mRNA-splicing regulator WTAP	WTAP	sp|Q15007|FL2D_HUMAN Pre-mRNA-splicing regulator WTAP OS=Homo sapiens OX=9606 GN=WTAP PE=1 SV=2	1	3	3	3	0	0	0	0	0	0	0	0	0	1	0	2	0	1	1	#DIV/0!	0	0	0	0	0	1	1	0	0	0	0	2	0	0	0	0	0	0	0	0	0	0
Q9H0M4	Q9H0M4	3	3	3	Zinc finger CW-type PWWP domain protein 1	ZCWPW1	sp|Q9H0M4|ZCPW1_HUMAN Zinc finger CW-type PWWP domain protein 1 OS=Homo sapiens OX=9606 GN=ZCWPW1 PE=1 SV=2	1	3	3	3	1	0	0	0	1	0	2	1	0	1	0	0	0	0	1	#DIV/0!	1	0	0	0	2	1	0	0	1	1	0	0	0	0	0	1	1	0	0	0	1	0
P06748	P06748	3	3	3	Nucleophosmin	NPM1	sp|P06748|NPM_HUMAN Nucleophosmin OS=Homo sapiens OX=9606 GN=NPM1 PE=1 SV=2	1	3	3	3	0	0	0	1	2	0	1	1	0	0	0	0	0	1	1	#DIV/0!	0	0	0	0	1	0	1	1	2	1	0	0	0	0	0	0	0	0	0	1	2	0
P07237	P07237	3	3	3	Protein disulfide-isomerase	P4HB	sp|P07237|PDIA1_HUMAN Protein disulfide-isomerase OS=Homo sapiens OX=9606 GN=P4HB PE=1 SV=3	1	3	3	3	0	0	0	0	3	0	0	0	0	0	0	1	0	0	1	#DIV/0!	0	0	0	0	0	0	0	0	3	0	0	1	0	0	0	1	0	0	0	0	3	0
P10599	P10599	3	3	3	Thioredoxin	TXN	sp|P10599|THIO_HUMAN Thioredoxin OS=Homo sapiens OX=9606 GN=TXN PE=1 SV=3	1	3	3	3	0	0	0	0	2	0	1	0	1	0	0	1	0	0	1	#DIV/0!	0	0	0	0	1	0	0	0	2	0	1	1	0	0	0	2	0	0	0	0	2	0
P13010	P13010	3	3	3	X-ray repair cross-complementing protein 5	XRCC5	sp|P13010|XRCC5_HUMAN X-ray repair cross-complementing protein 5 OS=Homo sapiens OX=9606 GN=XRCC5 PE=1 SV=3	1	3	3	3	0	0	0	0	3	0	0	0	0	0	0	0	0	0	1	#DIV/0!	0	0	0	0	0	0	0	0	3	0	0	0	0	0	0	0	0	0	0	0	3	0
P14314	P14314	3	3	3	Glucosidase 2 subunit beta	PRKCSH	sp|P14314|GLU2B_HUMAN Glucosidase 2 subunit beta OS=Homo sapiens OX=9606 GN=PRKCSH PE=1 SV=2	1	3	3	3	0	0	0	0	3	0	1	0	0	0	0	0	0	0	1	#DIV/0!	0	0	0	0	1	0	0	0	3	0	0	0	0	0	0	0	0	0	0	0	3	0
P18206	P18206	3	3	3	Vinculin	VCL	sp|P18206|VINC_HUMAN Vinculin OS=Homo sapiens OX=9606 GN=VCL PE=1 SV=4	1	3	3	3	0	0	0	0	3	0	0	0	0	0	0	0	0	0	1	#DIV/0!	0	0	0	0	0	0	0	0	3	0	0	0	0	0	0	0	0	0	0	0	3	0
P42704	P42704	3	3	3	Leucine-rich PPR motif-containing protein, mitochondrial	LRPPRC	sp|P42704|LPPRC_HUMAN Leucine-rich PPR motif-containing protein, mitochondrial OS=Homo sapiens OX=9606 GN=LRPPRC PE=1 SV=3	1	3	3	3	0	0	0	0	3	0	0	0	0	0	0	0	0	0	1	#DIV/0!	0	0	0	0	0	0	0	0	3	0	0	0	0	0	0	0	0	0	0	0	3	0
P48643	P48643	3	3	3	T-complex protein 1 subunit epsilon	CCT5	sp|P48643|TCPE_HUMAN T-complex protein 1 subunit epsilon OS=Homo sapiens OX=9606 GN=CCT5 PE=1 SV=1	1	3	3	3	0	0	0	0	2	0	1	0	0	0	0	0	0	0	1	#DIV/0!	0	0	0	0	1	0	0	0	2	0	0	0	0	0	0	0	0	0	0	0	2	0
P49321	P49321	3	3	3	Nuclear autoantigenic sperm protein	NASP	sp|P49321|NASP_HUMAN Nuclear autoantigenic sperm protein OS=Homo sapiens OX=9606 GN=NASP PE=1 SV=2	1	3	3	3	0	0	0	0	3	0	0	0	0	0	0	0	0	0	1	#DIV/0!	0	0	0	0	0	0	0	0	3	0	0	0	0	0	0	0	0	0	0	0	3	0
P49327	P49327	3	3	3	Fatty acid synthase	FASN	sp|P49327|FAS_HUMAN Fatty acid synthase OS=Homo sapiens OX=9606 GN=FASN PE=1 SV=3	1	3	3	3	0	0	0	0	3	0	1	0	0	0	0	0	0	0	1	#DIV/0!	0	0	0	0	1	0	0	0	3	0	0	0	0	0	0	0	0	0	0	0	3	0
P50991	P50991	3	3	3	T-complex protein 1 subunit delta	CCT4	sp|P50991|TCPD_HUMAN T-complex protein 1 subunit delta OS=Homo sapiens OX=9606 GN=CCT4 PE=1 SV=4	1	3	3	3	0	0	0	0	3	0	0	0	1	0	0	0	0	0	1	#DIV/0!	0	0	0	0	0	0	0	0	3	0	1	0	0	0	0	0	0	0	0	0	3	0
P62701	P62701	3	3	3	40S ribosomal protein S4, X isoform	RPS4X	sp|P62701|RS4X_HUMAN 40S ribosomal protein S4, X isoform OS=Homo sapiens OX=9606 GN=RPS4X PE=1 SV=2	1	3	3	3	0	0	0	0	3	0	1	0	0	0	0	0	0	0	1	#DIV/0!	0	0	0	0	1	0	0	0	3	0	0	0	0	0	0	0	0	0	0	0	3	0
P67936;P07951;P09493;CON__Q3SX28	P67936	4;1;1;1	4;1;1;1	3;0;0;0	Tropomyosin alpha-4 chain	TPM4	sp|P67936|TPM4_HUMAN Tropomyosin alpha-4 chain OS=Homo sapiens OX=9606 GN=TPM4 PE=1 SV=3	4	4	4	3	0	0	0	2	2	0	1	0	0	0	0	2	0	0	1	#DIV/0!	0	0	0	0	1	0	0	2	2	0	0	2	0	0	0	1	0	0	0	2	1	0
P78371	P78371	3	3	3	T-complex protein 1 subunit beta	CCT2	sp|P78371|TCPB_HUMAN T-complex protein 1 subunit beta OS=Homo sapiens OX=9606 GN=CCT2 PE=1 SV=4	1	3	3	3	0	0	0	0	3	0	1	0	0	0	0	1	0	0	1	#DIV/0!	0	0	0	0	1	0	0	0	3	0	0	1	0	0	0	0	0	0	0	0	3	0
Q00610	Q00610	3	3	3	Clathrin heavy chain 1	CLTC	sp|Q00610|CLH1_HUMAN Clathrin heavy chain 1 OS=Homo sapiens OX=9606 GN=CLTC PE=1 SV=5	1	3	3	3	0	0	0	0	3	0	0	0	0	0	0	0	0	0	1	#DIV/0!	0	0	0	0	0	0	0	0	3	0	0	0	0	0	0	0	0	0	0	0	3	0
Q04637	Q04637	3	3	3	Eukaryotic translation initiation factor 4 gamma 1	EIF4G1	sp|Q04637|IF4G1_HUMAN Eukaryotic translation initiation factor 4 gamma 1 OS=Homo sapiens OX=9606 GN=EIF4G1 PE=1 SV=4	1	3	3	3	0	0	0	0	3	0	0	0	0	0	0	0	0	0	1	#DIV/0!	0	0	0	0	0	0	0	0	3	0	0	0	0	0	0	0	0	0	0	0	3	0
Q05048	Q05048	3	3	3	Cleavage stimulation factor subunit 1	CSTF1	sp|Q05048|CSTF1_HUMAN Cleavage stimulation factor subunit 1 OS=Homo sapiens OX=9606 GN=CSTF1 PE=1 SV=1	1	3	3	3	0	0	0	1	0	0	0	0	0	0	0	3	0	0	1	#DIV/0!	0	0	0	0	0	0	0	1	0	0	0	3	0	0	0	0	0	0	0	1	0	0
Q92598	Q92598	3	3	3	Heat shock protein 105 kDa	HSPH1	sp|Q92598|HS105_HUMAN Heat shock protein 105 kDa OS=Homo sapiens OX=9606 GN=HSPH1 PE=1 SV=1	1	3	3	3	0	0	0	0	2	0	1	0	0	0	0	0	0	0	1	#DIV/0!	0	0	0	0	1	0	0	0	2	0	0	0	0	0	0	1	0	0	0	0	2	0
Q9HB71	Q9HB71	3	3	3	Calcyclin-binding protein	CACYBP	sp|Q9HB71|CYBP_HUMAN Calcyclin-binding protein OS=Homo sapiens OX=9606 GN=CACYBP PE=1 SV=2	1	3	3	3	0	0	0	0	3	0	0	0	0	0	0	0	0	0	1	#DIV/0!	0	0	0	0	0	0	0	0	3	0	0	0	0	0	0	0	0	0	0	0	3	0
Q9UNM6	Q9UNM6	3	3	3	26S proteasome non-ATPase regulatory subunit 13	PSMD13	sp|Q9UNM6|PSD13_HUMAN 26S proteasome non-ATPase regulatory subunit 13 OS=Homo sapiens OX=9606 GN=PSMD13 PE=1 SV=2	1	3	3	3	0	0	0	0	3	0	0	0	0	0	0	0	0	0	1	#DIV/0!	0	0	0	0	0	0	0	0	3	0	0	0	0	0	0	0	0	0	0	0	3	0
P68371;P04350;Q3ZCM7;A6NNZ2	P68371;P04350	14;11;6;5	3;2;1;0	2;1;1;0	Tubulin beta-4B chain	TUBB4B	sp|P68371|TBB4B_HUMAN Tubulin beta-4B chain OS=Homo sapiens OX=9606 GN=TUBB4B PE=1 SV=1;sp|P04350|TBB4A_HUMAN Tubulin beta-4A chain OS=Homo sapiens OX=9606 GN=TUBB4A PE=1 SV=2	4	14	3	2	1	2	1	3	5	3	7	6	6	10	4	3	1	7	1	0.25	0	0	0	0	1	3	1	1	0	0	0	1	0	0	0	0	0	0	0	1	0	0
P10412	P10412	6	6	2	Histone H1.4	HIST1H1E	sp|P10412|H14_HUMAN Histone H1.4 OS=Homo sapiens OX=9606 GN=HIST1H1E PE=1 SV=2	1	6	6	2	1	1	1	1	3	1	1	2	5	4	1	1	2	3	1	2	1	1	1	1	1	4	3	1	3	2	5	1	2	1	2	2	0	0	0	0	0	0
P16401	P16401	3	2	2	Histone H1.5	HIST1H1B	sp|P16401|H15_HUMAN Histone H1.5 OS=Homo sapiens OX=9606 GN=HIST1H1B PE=1 SV=3	1	3	2	2	0	0	0	0	2	0	1	0	2	3	0	1	2	0	1	#DIV/0!	0	0	0	0	1	2	0	0	2	0	2	1	0	0	1	0	0	0	0	0	2	0
P01599	P01599	2	2	2	Ig kappa chain V-I region Gal		sp|P01599|KV117_HUMAN Immunoglobulin kappa variable 1-17 OS=Homo sapiens OX=9606 GN=IGKV1-17 PE=1 SV=2	1	2	2	2	0	1	0	0	0	1	0	1	0	2	0	0	0	1	1	#DIV/0!	0	1	0	1	0	2	1	0	0	1	0	0	1	0	0	0	0	1	0	0	0	1
P22061	P22061	2	2	2	Protein-L-isoaspartate(D-aspartate) O-methyltransferase	PCMT1	sp|P22061|PIMT_HUMAN Protein-L-isoaspartate(D-aspartate) O-methyltransferase OS=Homo sapiens OX=9606 GN=PCMT1 PE=1 SV=4	1	2	2	2	1	0	0	1	1	0	1	1	0	2	0	2	0	0	1	#DIV/0!	1	0	0	0	1	2	0	1	1	1	0	2	0	0	0	0	1	0	0	1	1	0
P27348	P27348	3	2	2	14-3-3 protein theta	YWHAQ	sp|P27348|1433T_HUMAN 14-3-3 protein theta OS=Homo sapiens OX=9606 GN=YWHAQ PE=1 SV=1	1	3	2	2	1	0	0	0	2	0	0	0	0	2	0	0	1	0	1	#DIV/0!	1	0	0	0	0	1	0	0	1	0	0	0	0	0	1	1	1	0	0	0	1	0
P83731	P83731	2	2	2	60S ribosomal protein L24	RPL24	sp|P83731|RL24_HUMAN 60S ribosomal protein L24 OS=Homo sapiens OX=9606 GN=RPL24 PE=1 SV=1	1	2	2	2	0	0	0	0	1	0	1	0	0	2	0	0	0	0	1	#DIV/0!	0	0	0	0	1	2	0	0	1	0	0	0	0	0	0	0	0	0	0	0	1	0
Q02543	Q02543	2	2	2	60S ribosomal protein L18a	RPL18A	sp|Q02543|RL18A_HUMAN 60S ribosomal protein L18a OS=Homo sapiens OX=9606 GN=RPL18A PE=1 SV=2	1	2	2	2	0	0	0	1	0	0	0	0	0	2	0	0	0	0	1	#DIV/0!	0	0	0	0	0	2	0	1	0	0	0	0	0	0	0	1	0	0	0	1	0	0
P23396	P23396	2	2	2	40S ribosomal protein S3	RPS3	sp|P23396|RS3_HUMAN 40S ribosomal protein S3 OS=Homo sapiens OX=9606 GN=RPS3 PE=1 SV=2	1	2	2	2	0	1	0	0	2	0	0	0	1	1	1	1	0	0	1	0	0	1	0	0	0	1	0	0	2	0	1	1	1	1	0	1	0	1	0	0	2	0
O14497;Q8NFD5	O14497;Q8NFD5	2;1	2;1	2;1	AT-rich interactive domain-containing protein 1A	ARID1A	sp|O14497|ARI1A_HUMAN AT-rich interactive domain-containing protein 1A OS=Homo sapiens OX=9606 GN=ARID1A PE=1 SV=3;sp|Q8NFD5|ARI1B_HUMAN AT-rich interactive domain-containing protein 1B OS=Homo sapiens OX=9606 GN=ARID1B PE=1 SV=2	2	2	2	2	0	1	0	0	0	0	0	0	0	1	0	0	0	0	1	#DIV/0!	0	1	0	0	0	1	0	0	0	0	0	0	1	0	0	0	0	1	0	0	0	0
B9UYK7;C1IWT2;C5IY46;Q3YPH4	B9UYK7;C1IWT2;C5IY46;Q3YPH4	2;1;1;1	2;1;1;1	2;1;1;1			sp|B9UYK7|CAPSD_HBOC2 Minor capsid protein VP1 OS=Human bocavirus 2 OX=573977 GN=VP1 PE=3 SV=1;sp|C1IWT2|CAPSD_HBOC3 Minor capsid protein VP1 OS=Human bocavirus 3 OX=638313 GN=VP1 PE=1 SV=1;sp|C5IY46|CAPSD_HBOC4 Minor capsid protein VP1 OS=Human bocavirus	4	2	2	2	0	1	0	1	0	0	0	1	0	1	1	0	0	1	1	0	0	1	0	0	0	1	1	1	0	1	0	0	1	1	0	1	0	1	0	1	0	0
P15311	P15311	2	2	2	Ezrin	EZR	sp|P15311|EZRI_HUMAN Ezrin OS=Homo sapiens OX=9606 GN=EZR PE=1 SV=4	1	2	2	2	0	1	0	0	1	0	0	0	0	1	0	0	0	0	1	#DIV/0!	0	1	0	0	0	1	0	0	1	0	0	0	0	0	0	1	0	1	0	0	1	0
E9PAV3;Q13765	E9PAV3;Q13765	2;2	2;2	2;2	Nascent polypeptide-associated complex subunit alpha, muscle-specific form	NACA	sp|E9PAV3|NACAM_HUMAN Nascent polypeptide-associated complex subunit alpha, muscle-specific form OS=Homo sapiens OX=9606 GN=NACA PE=1 SV=1;sp|Q13765|NACA_HUMAN Nascent polypeptide-associated complex subunit alpha OS=Homo sapiens OX=9606 GN=NACA PE=1 SV=1	2	2	2	2	0	0	0	0	2	0	0	0	0	1	1	1	0	0	1	0	0	0	0	0	0	1	0	0	2	0	0	1	0	1	0	1	0	0	0	0	2	0
O00299	O00299	2	2	2	Chloride intracellular channel protein 1	CLIC1	sp|O00299|CLIC1_HUMAN Chloride intracellular channel protein 1 OS=Homo sapiens OX=9606 GN=CLIC1 PE=1 SV=4	1	2	2	2	0	0	1	0	1	0	0	0	1	1	1	0	0	0	1	0	0	0	1	0	0	1	0	0	1	0	1	0	0	1	0	0	0	0	1	0	1	0
O43852	O43852	2	2	2	Calumenin	CALU	sp|O43852|CALU_HUMAN Calumenin OS=Homo sapiens OX=9606 GN=CALU PE=1 SV=2	1	2	2	2	1	0	0	2	1	0	0	0	0	1	0	0	0	0	1	#DIV/0!	1	0	0	0	0	1	0	2	1	0	0	0	0	0	0	0	1	0	0	2	1	0
O94823	O94823	2	2	2	Probable phospholipid-transporting ATPase VB	ATP10B	sp|O94823|AT10B_HUMAN Probable phospholipid-transporting ATPase VB OS=Homo sapiens OX=9606 GN=ATP10B PE=2 SV=2	1	2	2	2	2	0	1	1	0	1	1	1	0	1	1	1	1	1	1	1	2	0	1	1	1	1	1	1	0	1	0	1	2	1	1	0	2	0	1	1	0	1
P01834;P0DOX7	P01834;P0DOX7	2;2	2;2	2;2	Ig kappa chain C region	IGKC	sp|P01834|IGKC_HUMAN Immunoglobulin kappa constant OS=Homo sapiens OX=9606 GN=IGKC PE=1 SV=2;sp|P0DOX7|IGK_HUMAN Immunoglobulin kappa light chain OS=Homo sapiens OX=9606 PE=1 SV=1	2	2	2	2	0	1	1	1	1	1	1	2	1	1	1	1	1	0	1	1	0	1	1	1	1	1	0	1	1	2	1	1	0	1	1	1	0	1	1	1	1	1
P0DMV8;P0DMV9	P0DMV8;P0DMV9	5;5	4;4	2;2	Heat shock 70 kDa protein 1A	HSPA1A	sp|P0DMV8|HS71A_HUMAN Heat shock 70 kDa protein 1A OS=Homo sapiens OX=9606 GN=HSPA1A PE=1 SV=1;sp|P0DMV9|HS71B_HUMAN Heat shock 70 kDa protein 1B OS=Homo sapiens OX=9606 GN=HSPA1B PE=1 SV=1	2	5	4	2	0	0	1	0	3	0	1	0	1	1	0	1	1	0	1	#DIV/0!	0	0	1	0	1	0	0	0	3	0	0	0	0	0	1	3	0	0	1	0	2	0
P11586	P11586	2	2	2	C-1-tetrahydrofolate synthase, cytoplasmic	MTHFD1	sp|P11586|C1TC_HUMAN C-1-tetrahydrofolate synthase, cytoplasmic OS=Homo sapiens OX=9606 GN=MTHFD1 PE=1 SV=3	1	2	2	2	0	0	0	0	2	0	0	0	0	1	0	0	0	0	1	#DIV/0!	0	0	0	0	0	1	0	0	2	0	0	0	0	0	0	0	0	0	0	0	2	0
P18077	P18077	2	2	2	60S ribosomal protein L35a	RPL35A	sp|P18077|RL35A_HUMAN 60S ribosomal protein L35a OS=Homo sapiens OX=9606 GN=RPL35A PE=1 SV=2	1	2	2	2	0	0	0	0	1	0	0	0	0	1	0	0	0	0	1	#DIV/0!	0	0	0	0	0	1	0	0	1	0	0	0	0	0	0	0	0	0	0	0	1	0
P20700	P20700	2	2	2	Lamin-B1	LMNB1	sp|P20700|LMNB1_HUMAN Lamin-B1 OS=Homo sapiens OX=9606 GN=LMNB1 PE=1 SV=2	1	2	2	2	0	0	0	0	1	0	0	0	0	1	0	1	0	0	1	#DIV/0!	0	0	0	0	0	1	0	0	1	0	0	1	0	0	0	0	0	0	0	0	1	0
P30050	P30050	2	2	2	60S ribosomal protein L12	RPL12	sp|P30050|RL12_HUMAN 60S ribosomal protein L12 OS=Homo sapiens OX=9606 GN=RPL12 PE=1 SV=1	1	2	2	2	0	0	0	0	2	0	0	0	0	1	0	0	0	0	1	#DIV/0!	0	0	0	0	0	1	0	0	2	0	0	0	0	0	0	1	0	0	0	0	2	0
P31943;P55795	P31943;P55795	2;1	2;1	2;1	Heterogeneous nuclear ribonucleoprotein H	HNRNPH1	sp|P31943|HNRH1_HUMAN Heterogeneous nuclear ribonucleoprotein H OS=Homo sapiens OX=9606 GN=HNRNPH1 PE=1 SV=4;sp|P55795|HNRH2_HUMAN Heterogeneous nuclear ribonucleoprotein H2 OS=Homo sapiens OX=9606 GN=HNRNPH2 PE=1 SV=1	2	2	2	2	0	0	0	1	1	0	0	0	0	1	0	0	0	0	1	#DIV/0!	0	0	0	0	0	1	0	1	1	0	0	0	0	0	0	0	0	0	0	1	1	0
P33176	P33176	2	2	2	Kinesin-1 heavy chain	KIF5B	sp|P33176|KINH_HUMAN Kinesin-1 heavy chain OS=Homo sapiens OX=9606 GN=KIF5B PE=1 SV=1	1	2	2	2	0	0	0	0	1	0	0	0	0	1	0	0	0	1	1	#DIV/0!	0	0	0	0	0	1	1	0	1	0	0	0	1	0	0	0	0	0	0	0	1	0
P42766	P42766	2	2	2	60S ribosomal protein L35	RPL35	sp|P42766|RL35_HUMAN 60S ribosomal protein L35 OS=Homo sapiens OX=9606 GN=RPL35 PE=1 SV=2	1	2	2	2	0	0	0	1	2	0	0	1	0	1	0	0	0	0	1	#DIV/0!	0	0	0	0	0	1	0	1	2	1	0	0	0	0	0	0	0	0	0	1	2	0
P46782	P46782	2	2	2	40S ribosomal protein S5	RPS5	sp|P46782|RS5_HUMAN 40S ribosomal protein S5 OS=Homo sapiens OX=9606 GN=RPS5 PE=1 SV=4	1	2	2	2	0	0	0	0	2	1	0	0	1	1	0	0	0	1	1	#DIV/0!	0	0	0	1	0	1	1	0	2	0	1	0	0	0	0	0	0	0	0	0	2	1
P50914	P50914	2	2	2	60S ribosomal protein L14	RPL14	sp|P50914|RL14_HUMAN 60S ribosomal protein L14 OS=Homo sapiens OX=9606 GN=RPL14 PE=1 SV=4	1	2	2	2	0	0	0	0	1	0	1	1	0	1	0	0	0	0	1	#DIV/0!	0	0	0	0	1	1	0	0	1	1	0	0	0	0	0	0	0	0	0	0	1	0
P51805	P51805	2	2	2	Plexin-A3	PLXNA3	sp|P51805|PLXA3_HUMAN Plexin-A3 OS=Homo sapiens OX=9606 GN=PLXNA3 PE=1 SV=2	1	2	2	2	1	0	1	1	2	1	1	0	0	1	1	1	1	0	1	1	1	0	1	1	1	1	0	1	2	0	0	1	1	1	1	2	1	0	1	1	2	1
P51991	P51991	2	2	2	Heterogeneous nuclear ribonucleoprotein A3	HNRNPA3	sp|P51991|ROA3_HUMAN Heterogeneous nuclear ribonucleoprotein A3 OS=Homo sapiens OX=9606 GN=HNRNPA3 PE=1 SV=2	1	2	2	2	0	0	0	0	0	0	0	0	0	1	0	2	0	0	1	#DIV/0!	0	0	0	0	0	1	0	0	0	0	0	2	0	0	0	0	0	0	0	0	0	0
P62266	P62266	2	2	2	40S ribosomal protein S23	RPS23	sp|P62266|RS23_HUMAN 40S ribosomal protein S23 OS=Homo sapiens OX=9606 GN=RPS23 PE=1 SV=3	1	2	2	2	0	0	0	0	1	0	0	0	0	1	0	0	0	0	1	#DIV/0!	0	0	0	0	0	1	0	0	1	0	0	0	0	0	0	0	0	0	0	0	1	0
P62750	P62750	2	2	2	60S ribosomal protein L23a	RPL23A	sp|P62750|RL23A_HUMAN 60S ribosomal protein L23a OS=Homo sapiens OX=9606 GN=RPL23A PE=1 SV=1	1	2	2	2	0	0	0	0	1	0	0	0	0	1	0	1	0	0	1	#DIV/0!	0	0	0	0	0	1	0	0	1	0	0	1	0	0	0	2	0	0	0	0	1	0
P68400;Q8NEV1;P17540;P19784;P12532	P68400;Q8NEV1;P17540;P19784;P12532	2;2;1;1;1	2;2;1;1;1	2;2;1;1;1	Casein kinase II subunit alpha	CSNK2A1	sp|P68400|CSK21_HUMAN Casein kinase II subunit alpha OS=Homo sapiens OX=9606 GN=CSNK2A1 PE=1 SV=1;sp|Q8NEV1|CSK23_HUMAN Casein kinase II subunit alpha 3 OS=Homo sapiens OX=9606 GN=CSNK2A3 PE=1 SV=2;sp|P17540|KCRS_HUMAN Creatine kinase S-type, mitochondrial	5	2	2	2	1	0	1	0	0	0	0	0	0	1	0	0	1	0	1	#DIV/0!	1	0	1	0	0	1	0	0	0	0	0	0	0	0	1	0	1	0	1	0	0	0
P81274	P81274	2	2	2	G-protein-signaling modulator 2	GPSM2	sp|P81274|GPSM2_HUMAN G-protein-signaling modulator 2 OS=Homo sapiens OX=9606 GN=GPSM2 PE=1 SV=3	1	2	2	2	1	0	0	1	1	0	0	1	0	1	0	0	0	0	1	#DIV/0!	1	0	0	0	0	1	0	1	1	1	0	0	0	0	0	1	1	0	0	1	1	0
Q07065	Q07065	2	2	2	Cytoskeleton-associated protein 4	CKAP4	sp|Q07065|CKAP4_HUMAN Cytoskeleton-associated protein 4 OS=Homo sapiens OX=9606 GN=CKAP4 PE=1 SV=2	1	2	2	2	0	0	0	0	1	0	0	0	0	1	0	0	0	0	1	#DIV/0!	0	0	0	0	0	1	0	0	1	0	0	0	0	0	0	0	0	0	0	0	1	0
Q15365;P57721	Q15365	3;1	3;1	2;0	Poly(rC)-binding protein 1	PCBP1	sp|Q15365|PCBP1_HUMAN Poly(rC)-binding protein 1 OS=Homo sapiens OX=9606 GN=PCBP1 PE=1 SV=2	2	3	3	2	0	0	1	1	3	0	1	0	0	1	0	1	0	0	1	#DIV/0!	0	0	1	0	1	1	0	1	3	0	0	1	0	0	0	2	0	0	0	0	2	0
Q8NFJ5	Q8NFJ5	2	2	2	Retinoic acid-induced protein 3	GPRC5A	sp|Q8NFJ5|RAI3_HUMAN Retinoic acid-induced protein 3 OS=Homo sapiens OX=9606 GN=GPRC5A PE=1 SV=2	1	2	2	2	0	0	0	0	0	0	0	0	0	1	0	0	0	1	1	#DIV/0!	0	0	0	0	0	1	1	0	0	0	0	0	0	0	0	0	0	0	0	0	0	0
Q8WZ42	Q8WZ42	2	2	2	Titin	TTN	sp|Q8WZ42|TITIN_HUMAN Titin OS=Homo sapiens OX=9606 GN=TTN PE=1 SV=4	1	2	2	2	0	0	0	1	0	0	0	0	0	1	0	0	0	0	1	#DIV/0!	0	0	0	0	0	1	0	1	0	0	0	0	0	0	0	0	0	0	0	1	0	0
P52209	P52209	2	2	2	6-phosphogluconate dehydrogenase, decarboxylating	PGD	sp|P52209|6PGD_HUMAN 6-phosphogluconate dehydrogenase, decarboxylating OS=Homo sapiens OX=9606 GN=PGD PE=1 SV=3	1	2	2	2	0	1	0	0	2	0	1	0	0	0	0	0	0	0	1	#DIV/0!	0	1	0	0	1	0	0	0	2	0	0	0	0	0	0	0	0	1	0	0	2	0
P18085	P18085	2	2	2	ADP-ribosylation factor 4	ARF4	sp|P18085|ARF4_HUMAN ADP-ribosylation factor 4 OS=Homo sapiens OX=9606 GN=ARF4 PE=1 SV=3	1	2	2	2	0	1	0	0	2	0	0	0	0	0	0	0	0	0	1	#DIV/0!	0	1	0	0	0	0	0	0	2	0	0	0	0	0	0	1	0	1	0	0	2	0
P09429;B2RPK0	P09429;B2RPK0	2;2	2;2	2;2	High mobility group protein B1	HMGB1	sp|P09429|HMGB1_HUMAN High mobility group protein B1 OS=Homo sapiens OX=9606 GN=HMGB1 PE=1 SV=3;sp|B2RPK0|HGB1A_HUMAN Putative high mobility group protein B1-like 1 OS=Homo sapiens OX=9606 GN=HMGB1P1 PE=5 SV=1	2	2	2	2	0	0	0	0	2	0	0	0	0	0	0	1	0	0	1	#DIV/0!	0	0	0	0	0	0	0	0	2	0	0	1	0	0	0	1	0	0	0	0	2	0
O14745	O14745	2	2	2	Na(+)/H(+) exchange regulatory cofactor NHE-RF1	SLC9A3R1	sp|O14745|NHRF1_HUMAN Na(+)/H(+) exchange regulatory cofactor NHE-RF1 OS=Homo sapiens OX=9606 GN=SLC9A3R1 PE=1 SV=4	1	2	2	2	0	0	0	0	1	0	0	1	1	0	0	0	0	0	1	#DIV/0!	0	0	0	0	0	0	0	0	1	1	1	0	1	0	0	0	0	0	0	0	1	0
P16615;O14983	P16615;O14983	2;2	2;2	2;2	Sarcoplasmic/endoplasmic reticulum calcium ATPase 2	ATP2A2	sp|P16615|AT2A2_HUMAN Sarcoplasmic/endoplasmic reticulum calcium ATPase 2 OS=Homo sapiens OX=9606 GN=ATP2A2 PE=1 SV=1;sp|O14983|AT2A1_HUMAN Sarcoplasmic/endoplasmic reticulum calcium ATPase 1 OS=Homo sapiens OX=9606 GN=ATP2A1 PE=1 SV=1	2	2	2	2	0	0	0	0	1	0	0	0	0	0	0	0	0	0	1	#DIV/0!	0	0	0	0	0	0	0	0	1	0	0	0	0	0	0	1	0	0	0	0	1	0
O95677	O95677	2	2	2	Eyes absent homolog 4	EYA4	sp|O95677|EYA4_HUMAN Eyes absent homolog 4 OS=Homo sapiens OX=9606 GN=EYA4 PE=1 SV=2	1	2	2	2	0	1	0	0	0	0	1	1	0	0	0	0	0	0	1	#DIV/0!	0	1	0	0	1	0	0	0	0	1	0	0	0	0	0	0	0	1	0	0	0	0
P00505	P00505	2	2	2	Aspartate aminotransferase, mitochondrial	GOT2	sp|P00505|AATM_HUMAN Aspartate aminotransferase, mitochondrial OS=Homo sapiens OX=9606 GN=GOT2 PE=1 SV=3	1	2	2	2	0	0	0	0	2	0	0	0	0	0	0	0	0	0	1	#DIV/0!	0	0	0	0	0	0	0	0	2	0	0	0	0	0	0	0	0	0	0	0	2	0
P04083	P04083	2	2	2	Annexin A1	ANXA1	sp|P04083|ANXA1_HUMAN Annexin A1 OS=Homo sapiens OX=9606 GN=ANXA1 PE=1 SV=2	1	2	2	2	0	0	0	0	2	0	0	0	0	0	0	1	0	0	1	#DIV/0!	0	0	0	0	0	0	0	0	2	0	0	1	0	0	0	0	0	0	0	0	2	0
P05386	P05386	2	2	2	60S acidic ribosomal protein P1	RPLP1	sp|P05386|RLA1_HUMAN 60S acidic ribosomal protein P1 OS=Homo sapiens OX=9606 GN=RPLP1 PE=1 SV=1	1	2	2	2	0	0	0	0	1	0	0	0	1	0	0	0	0	0	1	#DIV/0!	0	0	0	0	0	0	0	0	1	0	1	0	0	0	0	0	0	0	0	0	1	0
P06576	P06576	2	2	2	ATP synthase subunit beta, mitochondrial	ATP5B	sp|P06576|ATPB_HUMAN ATP synthase subunit beta, mitochondrial OS=Homo sapiens OX=9606 GN=ATP5F1B PE=1 SV=3	1	2	2	2	0	0	0	0	2	0	0	0	0	0	0	0	0	0	1	#DIV/0!	0	0	0	0	0	0	0	0	2	0	0	0	0	0	0	0	0	0	0	0	2	0
P07814	P07814	2	2	2	Bifunctional glutamate/proline--tRNA ligase	EPRS	sp|P07814|SYEP_HUMAN Bifunctional glutamate/proline--tRNA ligase OS=Homo sapiens OX=9606 GN=EPRS PE=1 SV=5	1	2	2	2	0	0	0	0	2	0	0	0	0	0	1	0	0	0	1	0	0	0	0	0	0	0	0	0	2	0	0	0	0	1	0	0	0	0	0	0	2	0
P08195	P08195	2	2	2	4F2 cell-surface antigen heavy chain	SLC3A2	sp|P08195|4F2_HUMAN 4F2 cell-surface antigen heavy chain OS=Homo sapiens OX=9606 GN=SLC3A2 PE=1 SV=3	1	2	2	2	0	0	0	0	2	0	0	0	0	0	0	0	0	0	1	#DIV/0!	0	0	0	0	0	0	0	0	2	0	0	0	0	0	0	0	0	0	0	0	2	0
P09211	P09211	2	2	2	Glutathione S-transferase P	GSTP1	sp|P09211|GSTP1_HUMAN Glutathione S-transferase P OS=Homo sapiens OX=9606 GN=GSTP1 PE=1 SV=2	1	2	2	2	0	0	0	0	1	0	0	0	0	0	0	0	0	0	1	#DIV/0!	0	0	0	0	0	0	0	0	1	0	0	0	0	0	0	1	0	0	0	0	1	0
P09651;Q32P51	P09651;Q32P51	2;1	2;1	2;1	Heterogeneous nuclear ribonucleoprotein A1	HNRNPA1	sp|P09651|ROA1_HUMAN Heterogeneous nuclear ribonucleoprotein A1 OS=Homo sapiens OX=9606 GN=HNRNPA1 PE=1 SV=5;sp|Q32P51|RA1L2_HUMAN Heterogeneous nuclear ribonucleoprotein A1-like 2 OS=Homo sapiens OX=9606 GN=HNRNPA1L2 PE=2 SV=2	2	2	2	2	0	0	0	0	1	0	0	0	0	0	0	1	0	0	1	#DIV/0!	0	0	0	0	0	0	0	0	1	0	0	1	0	0	0	0	0	0	0	0	1	0
P0DOX8;B9A064;P01709;P01706	P0DOX8;B9A064;P01709;P01706	2;1;1;1	2;1;1;1	2;1;1;1	Immunoglobulin lambda-like polypeptide 5	IGLL5	sp|P0DOX8|IGL1_HUMAN Immunoglobulin lambda-1 light chain OS=Homo sapiens OX=9606 PE=1 SV=1;sp|B9A064|IGLL5_HUMAN Immunoglobulin lambda-like polypeptide 5 OS=Homo sapiens OX=9606 GN=IGLL5 PE=2 SV=2;sp|P01709|LV208_HUMAN Immunoglobulin lambda variable 2-8 OS	4	2	2	2	0	0	0	1	0	0	1	1	0	0	0	1	0	0	1	#DIV/0!	0	0	0	0	1	0	0	1	0	1	0	1	0	0	0	1	0	0	0	1	0	0
P11413	P11413	2	2	2	Glucose-6-phosphate 1-dehydrogenase	G6PD	sp|P11413|G6PD_HUMAN Glucose-6-phosphate 1-dehydrogenase OS=Homo sapiens OX=9606 GN=G6PD PE=1 SV=4	1	2	2	2	0	0	0	0	2	0	0	0	0	0	0	0	0	0	1	#DIV/0!	0	0	0	0	0	0	0	0	2	0	0	0	0	0	0	1	0	0	0	0	2	0
P12268;P20839	P12268;P20839	2;1	2;1	2;1	Inosine-5-monophosphate dehydrogenase 2	IMPDH2	sp|P12268|IMDH2_HUMAN Inosine-5-monophosphate dehydrogenase 2 OS=Homo sapiens OX=9606 GN=IMPDH2 PE=1 SV=2;sp|P20839|IMDH1_HUMAN Inosine-5-monophosphate dehydrogenase 1 OS=Homo sapiens OX=9606 GN=IMPDH1 PE=1 SV=2	2	2	2	2	0	0	0	0	2	0	0	0	0	0	0	1	0	0	1	#DIV/0!	0	0	0	0	0	0	0	0	2	0	0	1	0	0	0	1	0	0	0	0	2	0
P12956	P12956	2	2	2	X-ray repair cross-complementing protein 6	XRCC6	sp|P12956|XRCC6_HUMAN X-ray repair cross-complementing protein 6 OS=Homo sapiens OX=9606 GN=XRCC6 PE=1 SV=2	1	2	2	2	0	0	0	0	2	0	0	0	0	0	0	0	0	0	1	#DIV/0!	0	0	0	0	0	0	0	0	2	0	0	0	0	0	0	0	0	0	0	0	2	0
P13489	P13489	2	2	2	Ribonuclease inhibitor	RNH1	sp|P13489|RINI_HUMAN Ribonuclease inhibitor OS=Homo sapiens OX=9606 GN=RNH1 PE=1 SV=2	1	2	2	2	0	0	0	0	2	0	0	0	0	0	0	0	0	0	1	#DIV/0!	0	0	0	0	0	0	0	0	2	0	0	0	0	0	0	0	0	0	0	0	2	0
P13667	P13667	2	2	2	Protein disulfide-isomerase A4	PDIA4	sp|P13667|PDIA4_HUMAN Protein disulfide-isomerase A4 OS=Homo sapiens OX=9606 GN=PDIA4 PE=1 SV=2	1	2	2	2	0	0	0	0	2	0	0	0	0	0	0	0	0	0	1	#DIV/0!	0	0	0	0	0	0	0	0	2	0	0	0	0	0	0	0	0	0	0	0	2	0
P14866	P14866	2	2	2	Heterogeneous nuclear ribonucleoprotein L	HNRNPL	sp|P14866|HNRPL_HUMAN Heterogeneous nuclear ribonucleoprotein L OS=Homo sapiens OX=9606 GN=HNRNPL PE=1 SV=2	1	2	2	2	0	0	0	0	2	0	0	0	0	0	0	0	0	0	1	#DIV/0!	0	0	0	0	0	0	0	0	2	0	0	0	0	0	0	0	0	0	0	0	2	0
P16989	P16989	3	2	2	Y-box-binding protein 3	YBX3	sp|P16989|YBOX3_HUMAN Y-box-binding protein 3 OS=Homo sapiens OX=9606 GN=YBX3 PE=1 SV=4	1	3	2	2	0	0	0	0	1	0	1	0	0	0	0	2	0	0	1	#DIV/0!	0	0	0	0	0	0	0	0	0	0	0	1	1	0	0	0	0	0	0	0	0	0
P17844;Q92841	P17844;Q92841	2;1	2;1	2;1	Probable ATP-dependent RNA helicase DDX5	DDX5	sp|P17844|DDX5_HUMAN Probable ATP-dependent RNA helicase DDX5 OS=Homo sapiens OX=9606 GN=DDX5 PE=1 SV=1;sp|Q92841|DDX17_HUMAN Probable ATP-dependent RNA helicase DDX17 OS=Homo sapiens OX=9606 GN=DDX17 PE=1 SV=2	2	2	2	2	0	0	0	0	1	0	1	0	0	0	0	0	0	0	1	#DIV/0!	0	0	0	0	1	0	0	0	1	0	0	0	0	0	0	0	0	0	0	0	1	0
P18669;P15259	P18669;P15259	2;1	2;1	2;1	Phosphoglycerate mutase 1	PGAM1	sp|P18669|PGAM1_HUMAN Phosphoglycerate mutase 1 OS=Homo sapiens OX=9606 GN=PGAM1 PE=1 SV=2;sp|P15259|PGAM2_HUMAN Phosphoglycerate mutase 2 OS=Homo sapiens OX=9606 GN=PGAM2 PE=1 SV=3	2	2	2	2	0	0	0	0	2	0	0	0	1	0	0	0	0	0	1	#DIV/0!	0	0	0	0	0	0	0	0	2	0	1	0	0	0	0	0	0	0	0	0	2	0
P21266;P28161;P46439	P21266;P28161;P46439	2;1;1	2;1;1	2;1;1	Glutathione S-transferase Mu 3	GSTM3	sp|P21266|GSTM3_HUMAN Glutathione S-transferase Mu 3 OS=Homo sapiens OX=9606 GN=GSTM3 PE=1 SV=3;sp|P28161|GSTM2_HUMAN Glutathione S-transferase Mu 2 OS=Homo sapiens OX=9606 GN=GSTM2 PE=1 SV=2;sp|P46439|GSTM5_HUMAN Glutathione S-transferase Mu 5 OS=Homo sap	3	2	2	2	0	0	0	0	2	0	0	1	0	0	0	0	0	0	1	#DIV/0!	0	0	0	0	0	0	0	0	2	1	0	0	0	0	0	0	0	0	0	0	2	0
P22234	P22234	2	2	2	Multifunctional protein ADE2	PAICS	sp|P22234|PUR6_HUMAN Multifunctional protein ADE2 OS=Homo sapiens OX=9606 GN=PAICS PE=1 SV=3	1	2	2	2	0	0	0	0	2	1	1	1	1	0	0	1	0	0	1	#DIV/0!	0	0	0	1	1	0	0	0	2	1	1	1	1	0	0	1	0	0	0	0	2	1
P22314	P22314	2	2	2	Ubiquitin-like modifier-activating enzyme 1	UBA1	sp|P22314|UBA1_HUMAN Ubiquitin-like modifier-activating enzyme 1 OS=Homo sapiens OX=9606 GN=UBA1 PE=1 SV=3	1	2	2	2	0	0	1	0	1	0	1	0	0	0	0	0	0	0	1	#DIV/0!	0	0	1	0	1	0	0	0	1	0	0	0	0	0	0	0	0	0	1	0	1	0
P25705	P25705	2	2	2	ATP synthase subunit alpha, mitochondrial	ATP5A1	sp|P25705|ATPA_HUMAN ATP synthase subunit alpha, mitochondrial OS=Homo sapiens OX=9606 GN=ATP5F1A PE=1 SV=1	1	2	2	2	0	0	0	0	2	0	0	0	0	0	0	0	0	0	1	#DIV/0!	0	0	0	0	0	0	0	0	2	0	0	0	0	0	0	0	0	0	0	0	2	0
P26599	P26599	2	2	2	Polypyrimidine tract-binding protein 1	PTBP1	sp|P26599|PTBP1_HUMAN Polypyrimidine tract-binding protein 1 OS=Homo sapiens OX=9606 GN=PTBP1 PE=1 SV=1	1	2	2	2	0	0	0	0	1	0	0	0	0	0	0	1	0	0	1	#DIV/0!	0	0	0	0	0	0	0	0	1	0	0	1	0	0	0	0	0	0	0	0	1	0
P27797	P27797	2	2	2	Calreticulin	CALR	sp|P27797|CALR_HUMAN Calreticulin OS=Homo sapiens OX=9606 GN=CALR PE=1 SV=1	1	2	2	2	0	0	1	0	2	0	0	0	1	0	0	0	0	1	1	#DIV/0!	0	0	1	0	0	0	1	0	2	0	1	0	1	0	0	0	0	0	1	0	2	0
P27816	P27816	2	2	2	Microtubule-associated protein 4	MAP4	sp|P27816|MAP4_HUMAN Microtubule-associated protein 4 OS=Homo sapiens OX=9606 GN=MAP4 PE=1 SV=3	1	2	2	2	0	0	0	0	2	0	0	0	0	0	0	0	0	0	1	#DIV/0!	0	0	0	0	0	0	0	0	2	0	0	0	0	0	0	0	0	0	0	0	2	0
P27824	P27824	2	2	2	Calnexin	CANX	sp|P27824|CALX_HUMAN Calnexin OS=Homo sapiens OX=9606 GN=CANX PE=1 SV=2	1	2	2	2	0	0	0	0	0	0	1	0	0	0	0	0	0	0	1	#DIV/0!	0	0	0	0	1	0	0	0	0	0	0	0	0	0	0	1	0	0	0	0	0	0
P30040	P30040	2	2	2	Endoplasmic reticulum resident protein 29	ERP29	sp|P30040|ERP29_HUMAN Endoplasmic reticulum resident protein 29 OS=Homo sapiens OX=9606 GN=ERP29 PE=1 SV=4	1	2	2	2	0	0	0	0	2	0	0	0	0	0	0	0	0	0	1	#DIV/0!	0	0	0	0	0	0	0	0	2	0	0	0	0	0	0	0	0	0	0	0	2	0
P30041	P30041	2	2	2	Peroxiredoxin-6	PRDX6	sp|P30041|PRDX6_HUMAN Peroxiredoxin-6 OS=Homo sapiens OX=9606 GN=PRDX6 PE=1 SV=3	1	2	2	2	0	0	1	0	2	0	0	0	1	0	1	0	0	0	1	0	0	0	1	0	0	0	0	0	2	0	1	0	0	1	0	1	0	0	1	0	2	0
P30153	P30153	2	2	2	Serine/threonine-protein phosphatase 2A 65 kDa regulatory subunit A alpha isoform	PPP2R1A	sp|P30153|2AAA_HUMAN Serine/threonine-protein phosphatase 2A 65 kDa regulatory subunit A alpha isoform OS=Homo sapiens OX=9606 GN=PPP2R1A PE=1 SV=4	1	2	2	2	0	0	0	0	2	0	0	0	0	0	0	0	0	0	1	#DIV/0!	0	0	0	0	0	0	0	0	2	0	0	0	0	0	0	0	0	0	0	0	2	0
P31948	P31948	2	2	2	Stress-induced-phosphoprotein 1	STIP1	sp|P31948|STIP1_HUMAN Stress-induced-phosphoprotein 1 OS=Homo sapiens OX=9606 GN=STIP1 PE=1 SV=1	1	2	2	2	0	0	0	0	2	1	0	0	0	0	0	0	0	0	1	#DIV/0!	0	0	0	1	0	0	0	0	2	0	0	0	1	0	0	0	0	0	0	0	2	1
P32119	P32119	3	2	2	Peroxiredoxin-2	PRDX2	sp|P32119|PRDX2_HUMAN Peroxiredoxin-2 OS=Homo sapiens OX=9606 GN=PRDX2 PE=1 SV=5	1	3	2	2	1	0	0	0	3	0	1	0	0	0	0	0	0	0	1	#DIV/0!	1	0	0	0	0	0	0	0	2	0	0	0	0	0	0	0	1	0	0	0	2	0
P35254;Q6UY66;Q1PDC7;Q1PD50;P35253	P35254;Q6UY66;Q1PDC7;Q1PD50;P35253	2;1;1;1;1	2;1;1;1;1	2;1;1;1;1			sp|P35254|VGP_MABVP Envelope glycoprotein OS=Lake Victoria marburgvirus (strain Popp-67) OX=33728 GN=GP PE=1 SV=1;sp|Q6UY66|VGP_MABVO Envelope glycoprotein OS=Lake Victoria marburgvirus (strain Ozolin-75) OX=482820 GN=GP PE=3 SV=1;sp|Q1PDC7|VGP_MABVR Envel	5	2	2	2	0	0	0	1	1	0	0	0	0	0	0	0	0	0	1	#DIV/0!	0	0	0	0	0	0	0	1	1	0	0	0	0	0	0	0	0	0	0	1	1	0
P38919	P38919	2	2	2	Eukaryotic initiation factor 4A-III	EIF4A3	sp|P38919|IF4A3_HUMAN Eukaryotic initiation factor 4A-III OS=Homo sapiens OX=9606 GN=EIF4A3 PE=1 SV=4	1	2	2	2	0	0	0	1	1	0	1	0	0	0	0	2	0	0	1	#DIV/0!	0	0	0	0	1	0	0	1	1	0	0	2	2	0	0	0	0	0	0	1	1	0
P40227;Q92526	P40227;Q92526	2;1	2;1	2;1	T-complex protein 1 subunit zeta	CCT6A	sp|P40227|TCPZ_HUMAN T-complex protein 1 subunit zeta OS=Homo sapiens OX=9606 GN=CCT6A PE=1 SV=3;sp|Q92526|TCPW_HUMAN T-complex protein 1 subunit zeta-2 OS=Homo sapiens OX=9606 GN=CCT6B PE=1 SV=5	2	2	2	2	0	0	0	0	1	0	1	0	0	0	0	0	0	0	1	#DIV/0!	0	0	0	0	1	0	0	0	1	0	0	0	0	0	0	0	0	0	0	0	1	0
P40429;Q6NVV1	P40429;Q6NVV1	2;1	2;1	2;1	60S ribosomal protein L13a	RPL13A	sp|P40429|RL13A_HUMAN 60S ribosomal protein L13a OS=Homo sapiens OX=9606 GN=RPL13A PE=1 SV=2;sp|Q6NVV1|R13P3_HUMAN Putative 60S ribosomal protein L13a protein RPL13AP3 OS=Homo sapiens OX=9606 GN=RPL13AP3 PE=5 SV=1	2	2	2	2	0	0	0	0	2	0	0	0	1	0	0	0	0	1	1	#DIV/0!	0	0	0	0	0	0	1	0	2	0	1	0	1	0	0	0	0	0	0	0	2	0
P45880	P45880	2	2	2	Voltage-dependent anion-selective channel protein 2	VDAC2	sp|P45880|VDAC2_HUMAN Voltage-dependent anion-selective channel protein 2 OS=Homo sapiens OX=9606 GN=VDAC2 PE=1 SV=2	1	2	2	2	0	0	0	0	2	0	0	0	0	0	0	0	0	0	1	#DIV/0!	0	0	0	0	0	0	0	0	2	0	0	0	0	0	0	0	0	0	0	0	2	0
P46779	P46779	2	2	2	60S ribosomal protein L28	RPL28	sp|P46779|RL28_HUMAN 60S ribosomal protein L28 OS=Homo sapiens OX=9606 GN=RPL28 PE=1 SV=3	1	2	2	2	1	0	0	1	2	0	0	0	0	0	0	1	0	0	1	#DIV/0!	1	0	0	0	0	0	0	1	2	0	0	1	0	0	0	1	1	0	0	1	2	0
P53396	P53396	2	2	2	ATP-citrate synthase	ACLY	sp|P53396|ACLY_HUMAN ATP-citrate synthase OS=Homo sapiens OX=9606 GN=ACLY PE=1 SV=3	1	2	2	2	0	0	0	0	2	0	1	0	0	0	0	0	0	0	1	#DIV/0!	0	0	0	0	1	0	0	0	2	0	0	0	0	0	0	0	0	0	0	0	2	0
P54108	P54108	2	2	2	Cysteine-rich secretory protein 3	CRISP3	sp|P54108|CRIS3_HUMAN Cysteine-rich secretory protein 3 OS=Homo sapiens OX=9606 GN=CRISP3 PE=1 SV=1	1	2	2	2	1	0	1	0	0	0	0	0	0	0	0	0	2	0	1	#DIV/0!	1	0	1	0	0	0	0	0	0	0	0	0	0	0	2	0	1	0	1	0	0	0
P55060	P55060	2	2	2	Exportin-2	CSE1L	sp|P55060|XPO2_HUMAN Exportin-2 OS=Homo sapiens OX=9606 GN=CSE1L PE=1 SV=3	1	2	2	2	0	0	0	0	2	0	0	0	0	0	0	0	0	0	1	#DIV/0!	0	0	0	0	0	0	0	0	2	0	0	0	0	0	0	0	0	0	0	0	2	0
P55769	P55769	2	2	2	NHP2-like protein 1	NHP2L1	sp|P55769|NH2L1_HUMAN NHP2-like protein 1 OS=Homo sapiens OX=9606 GN=SNU13 PE=1 SV=3	1	2	2	2	0	0	0	0	1	0	0	0	0	0	0	0	0	0	1	#DIV/0!	0	0	0	0	0	0	0	0	1	0	0	0	1	0	0	0	0	0	0	0	1	0
P56537	P56537	2	2	2	Eukaryotic translation initiation factor 6	EIF6	sp|P56537|IF6_HUMAN Eukaryotic translation initiation factor 6 OS=Homo sapiens OX=9606 GN=EIF6 PE=1 SV=1	1	2	2	2	0	0	0	0	2	0	0	0	0	0	0	0	0	0	1	#DIV/0!	0	0	0	0	0	0	0	0	2	0	0	0	0	0	0	0	0	0	0	0	2	0
P61019	P61019	2	2	2	Ras-related protein Rab-2A	RAB2A	sp|P61019|RAB2A_HUMAN Ras-related protein Rab-2A OS=Homo sapiens OX=9606 GN=RAB2A PE=1 SV=1	1	2	2	2	0	0	0	0	2	0	0	0	0	0	0	0	0	0	1	#DIV/0!	0	0	0	0	0	0	0	0	2	0	0	0	0	0	0	0	0	0	0	0	2	0
P61086	P61086	2	2	2	Ubiquitin-conjugating enzyme E2 K	UBE2K	sp|P61086|UBE2K_HUMAN Ubiquitin-conjugating enzyme E2 K OS=Homo sapiens OX=9606 GN=UBE2K PE=1 SV=3	1	2	2	2	0	0	0	0	2	0	0	0	0	0	0	0	0	0	1	#DIV/0!	0	0	0	0	0	0	0	0	2	0	0	0	0	0	0	0	0	0	0	0	2	0
P61578;Q69384;P61575;Q902F8;Q902F9;Q9UKH3;P61570;Q69383;P61579;P61574;P61583;P61573;P61572;P61576;P61580;P61581;O71037	P61578;Q69384;P61575;Q902F8;Q902F9;Q9UKH3;P61570;Q69383;P61579;P61574;P61583;P61573;P61572;P61576;P61580;P61581;O71037	2;1;1;1;1;1;1;1;1;1;1;1;1;1;1;1;1	2;1;1;1;1;1;1;1;1;1;1;1;1;1;1;1;1	2;1;1;1;1;1;1;1;1;1;1;1;1;1;1;1;1	Endogenous retrovirus group K member 16 Rec protein	ERVK-16	sp|P61578|REC16_HUMAN Endogenous retrovirus group K member 16 Rec protein OS=Homo sapiens OX=9606 GN=ERVK-16 PE=1 SV=1;sp|Q69384|ENK6_HUMAN Endogenous retrovirus group K member 6 Env polyprotein OS=Homo sapiens OX=9606 GN=ERVK-6 PE=1 SV=1;sp|P61575|RECK8_H	17	2	2	2	0	0	0	0	1	0	0	0	0	0	0	0	1	0	1	#DIV/0!	0	0	0	0	0	0	0	0	1	0	0	0	0	0	1	0	0	0	0	0	1	0
P62263	P62263	2	2	2	40S ribosomal protein S14	RPS14	sp|P62263|RS14_HUMAN 40S ribosomal protein S14 OS=Homo sapiens OX=9606 GN=RPS14 PE=1 SV=3	1	2	2	2	0	0	0	1	1	0	0	0	2	0	0	1	1	0	1	#DIV/0!	0	0	0	0	0	0	0	1	1	0	2	1	0	0	1	1	0	0	0	1	1	0
P62306	P62306	2	2	2	Small nuclear ribonucleoprotein F	SNRPF	sp|P62306|RUXF_HUMAN Small nuclear ribonucleoprotein F OS=Homo sapiens OX=9606 GN=SNRPF PE=1 SV=1	1	2	2	2	0	0	0	0	1	0	0	0	0	0	0	1	0	0	1	#DIV/0!	0	0	0	0	0	0	0	0	1	0	0	1	0	0	0	0	0	0	0	0	1	0
P62851	P62851	2	2	2	40S ribosomal protein S25	RPS25	sp|P62851|RS25_HUMAN 40S ribosomal protein S25 OS=Homo sapiens OX=9606 GN=RPS25 PE=1 SV=1	1	2	2	2	0	0	0	0	1	0	0	1	0	0	0	0	0	0	1	#DIV/0!	0	0	0	0	0	0	0	0	1	1	0	0	0	0	0	0	0	0	0	0	1	0
P62917	P62917	2	2	2	60S ribosomal protein L8	RPL8	sp|P62917|RL8_HUMAN 60S ribosomal protein L8 OS=Homo sapiens OX=9606 GN=RPL8 PE=1 SV=2	1	2	2	2	0	0	0	0	2	0	1	1	0	0	0	0	0	0	1	#DIV/0!	0	0	0	0	1	0	0	0	2	1	0	0	0	0	0	0	0	0	0	0	2	0
P63220	P63220	2	2	2	40S ribosomal protein S21	RPS21	sp|P63220|RS21_HUMAN 40S ribosomal protein S21 OS=Homo sapiens OX=9606 GN=RPS21 PE=1 SV=1	1	2	2	2	0	0	0	0	2	0	0	0	0	0	0	0	0	0	1	#DIV/0!	0	0	0	0	0	0	0	0	2	0	0	0	0	0	0	0	0	0	0	0	2	0
P63241;Q9GZV4;Q6IS14	P63241;Q9GZV4;Q6IS14	2;1;1	2;1;1	2;1;1	Eukaryotic translation initiation factor 5A-1	EIF5A	sp|P63241|IF5A1_HUMAN Eukaryotic translation initiation factor 5A-1 OS=Homo sapiens OX=9606 GN=EIF5A PE=1 SV=2;sp|Q9GZV4|IF5A2_HUMAN Eukaryotic translation initiation factor 5A-2 OS=Homo sapiens OX=9606 GN=EIF5A2 PE=1 SV=3;sp|Q6IS14|IF5AL_HUMAN Eukaryotic	3	2	2	2	0	0	0	0	2	0	0	0	1	0	0	1	0	1	1	#DIV/0!	0	0	0	0	0	0	1	0	2	0	1	1	1	0	0	0	0	0	0	0	2	0
P63244	P63244	2	2	2	Guanine nucleotide-binding protein subunit beta-2-like 1	GNB2L1	sp|P63244|RACK1_HUMAN Receptor of activated protein C kinase 1 OS=Homo sapiens OX=9606 GN=RACK1 PE=1 SV=3	1	2	2	2	0	0	1	0	1	0	0	0	1	0	1	0	0	1	1	0	0	0	1	0	0	0	1	0	1	0	1	0	1	1	0	0	0	0	1	0	1	0
Q969Q0;P83881	Q969Q0;P83881	2;2	2;2	2;2	60S ribosomal protein L36a-like	RPL36AL	sp|Q969Q0|RL36L_HUMAN 60S ribosomal protein L36a-like OS=Homo sapiens OX=9606 GN=RPL36AL PE=1 SV=3;sp|P83881|RL36A_HUMAN 60S ribosomal protein L36a OS=Homo sapiens OX=9606 GN=RPL36A PE=1 SV=2	2	2	2	2	0	0	0	1	1	0	1	0	0	0	0	1	0	0	1	#DIV/0!	0	0	0	0	1	0	0	1	1	0	0	1	0	0	0	1	0	0	0	1	1	0
P84098	P84098	2	2	2	60S ribosomal protein L19	RPL19	sp|P84098|RL19_HUMAN 60S ribosomal protein L19 OS=Homo sapiens OX=9606 GN=RPL19 PE=1 SV=1	1	2	2	2	0	0	0	1	2	0	0	0	1	0	0	1	0	0	1	#DIV/0!	0	0	0	0	0	0	0	1	2	0	1	1	0	0	0	0	0	0	0	1	2	0
Q01130;Q9BRL6	Q01130;Q9BRL6	2;1	2;1	2;1	Serine/arginine-rich splicing factor 2	SRSF2	sp|Q01130|SRSF2_HUMAN Serine/arginine-rich splicing factor 2 OS=Homo sapiens OX=9606 GN=SRSF2 PE=1 SV=4;sp|Q9BRL6|SRSF8_HUMAN Serine/arginine-rich splicing factor 8 OS=Homo sapiens OX=9606 GN=SRSF8 PE=1 SV=1	2	2	2	2	1	0	0	0	2	0	0	0	0	0	0	0	0	0	1	#DIV/0!	1	0	0	0	0	0	0	0	2	0	0	0	0	0	0	0	1	0	0	0	2	0
Q02790	Q02790	2	2	2	Peptidyl-prolyl cis-trans isomerase FKBP4	FKBP4	sp|Q02790|FKBP4_HUMAN Peptidyl-prolyl cis-trans isomerase FKBP4 OS=Homo sapiens OX=9606 GN=FKBP4 PE=1 SV=3	1	2	2	2	0	0	0	0	2	0	0	0	0	0	0	0	0	0	1	#DIV/0!	0	0	0	0	0	0	0	0	2	0	0	0	0	0	0	0	0	0	0	0	2	0
Q07666	Q07666	2	2	2	KH domain-containing, RNA-binding, signal transduction-associated protein 1	KHDRBS1	sp|Q07666|KHDR1_HUMAN KH domain-containing, RNA-binding, signal transduction-associated protein 1 OS=Homo sapiens OX=9606 GN=KHDRBS1 PE=1 SV=1	1	2	2	2	0	0	0	0	1	0	1	0	0	0	0	1	0	0	1	#DIV/0!	0	0	0	0	1	0	0	0	1	0	0	1	0	0	0	0	0	0	0	0	1	0
Q07955	Q07955	2	2	2	Serine/arginine-rich splicing factor 1	SRSF1	sp|Q07955|SRSF1_HUMAN Serine/arginine-rich splicing factor 1 OS=Homo sapiens OX=9606 GN=SRSF1 PE=1 SV=2	1	2	2	2	0	0	0	0	2	0	0	0	0	0	0	0	0	0	1	#DIV/0!	0	0	0	0	0	0	0	0	2	0	0	0	0	0	0	0	0	0	0	0	2	0
Q08554	Q08554	2	2	2	Desmocollin-1	DSC1	sp|Q08554|DSC1_HUMAN Desmocollin-1 OS=Homo sapiens OX=9606 GN=DSC1 PE=1 SV=2	1	2	2	2	0	0	0	0	0	0	0	0	0	0	0	0	1	0	1	#DIV/0!	0	0	0	0	0	0	0	0	0	0	0	0	0	0	1	1	0	0	0	0	0	0
Q12791	Q12791	2	2	2	Calcium-activated potassium channel subunit alpha-1	KCNMA1	sp|Q12791|KCMA1_HUMAN Calcium-activated potassium channel subunit alpha-1 OS=Homo sapiens OX=9606 GN=KCNMA1 PE=1 SV=2	1	2	2	2	0	0	0	1	0	0	0	1	0	0	0	0	0	1	1	#DIV/0!	0	0	0	0	0	0	1	1	0	1	0	0	0	0	0	0	0	0	0	1	0	0
Q12906	Q12906	2	2	2	Interleukin enhancer-binding factor 3	ILF3	sp|Q12906|ILF3_HUMAN Interleukin enhancer-binding factor 3 OS=Homo sapiens OX=9606 GN=ILF3 PE=1 SV=3	1	2	2	2	0	0	0	0	1	0	0	1	0	0	0	0	0	0	1	#DIV/0!	0	0	0	0	0	0	0	0	1	1	0	0	0	0	0	0	0	0	0	0	1	0
Q14103	Q14103	2	2	2	Heterogeneous nuclear ribonucleoprotein D0	HNRNPD	sp|Q14103|HNRPD_HUMAN Heterogeneous nuclear ribonucleoprotein D0 OS=Homo sapiens OX=9606 GN=HNRNPD PE=1 SV=1	1	2	2	2	0	0	0	0	2	0	0	0	0	0	0	0	0	0	1	#DIV/0!	0	0	0	0	0	0	0	0	2	0	0	0	0	0	0	1	0	0	0	0	2	0
Q14517	Q14517	2	2	2	Protocadherin Fat 1	FAT1	sp|Q14517|FAT1_HUMAN Protocadherin Fat 1 OS=Homo sapiens OX=9606 GN=FAT1 PE=1 SV=2	1	2	2	2	0	0	0	0	0	0	0	0	0	0	0	2	0	0	1	#DIV/0!	0	0	0	0	0	0	0	0	0	0	0	2	0	0	0	0	0	0	0	0	0	0
Q16851	Q16851	2	2	2	UTP--glucose-1-phosphate uridylyltransferase	UGP2	sp|Q16851|UGPA_HUMAN UTP--glucose-1-phosphate uridylyltransferase OS=Homo sapiens OX=9606 GN=UGP2 PE=1 SV=5	1	2	2	2	0	0	0	0	2	0	0	0	0	0	0	0	0	0	1	#DIV/0!	0	0	0	0	0	0	0	0	2	0	0	0	0	0	0	0	0	0	0	0	2	0
Q7Z406	Q7Z406	2	2	2	Myosin-14	MYH14	sp|Q7Z406|MYH14_HUMAN Myosin-14 OS=Homo sapiens OX=9606 GN=MYH14 PE=1 SV=2	1	2	2	2	0	0	0	0	0	0	0	0	0	0	2	0	0	1	1	0	0	0	0	0	0	0	1	0	0	0	0	0	1	2	0	0	0	0	0	0	0	0
Q86TB3	Q86TB3	2	2	2	Alpha-protein kinase 2	ALPK2	sp|Q86TB3|ALPK2_HUMAN Alpha-protein kinase 2 OS=Homo sapiens OX=9606 GN=ALPK2 PE=2 SV=3	1	2	2	2	1	0	1	0	0	0	0	0	0	0	1	1	0	0	1	0	1	0	1	0	0	0	0	0	0	0	0	1	0	1	0	0	1	0	1	0	0	0
Q8IV33	Q8IV33	2	2	2	Uncharacterized protein KIAA0825	KIAA0825	sp|Q8IV33|K0825_HUMAN Uncharacterized protein KIAA0825 OS=Homo sapiens OX=9606 GN=KIAA0825 PE=2 SV=3	1	2	2	2	1	0	1	1	0	0	2	0	0	0	0	0	1	0	1	#DIV/0!	1	0	1	0	2	0	0	1	0	0	0	0	0	0	1	0	1	0	1	1	0	0
Q8NC51	Q8NC51	2	2	2	Plasminogen activator inhibitor 1 RNA-binding protein	SERBP1	sp|Q8NC51|PAIRB_HUMAN Plasminogen activator inhibitor 1 RNA-binding protein OS=Homo sapiens OX=9606 GN=SERBP1 PE=1 SV=2	1	2	2	2	0	0	0	0	1	1	0	0	1	0	0	0	0	0	1	#DIV/0!	0	0	0	1	0	0	0	0	1	0	1	0	0	0	0	0	0	0	0	0	1	1
Q99853	Q99853	2	2	2	Forkhead box protein B1	FOXB1	sp|Q99853|FOXB1_HUMAN Forkhead box protein B1 OS=Homo sapiens OX=9606 GN=FOXB1 PE=1 SV=3	1	2	2	2	0	0	0	1	0	0	0	0	0	0	0	0	0	1	1	#DIV/0!	0	0	0	0	0	0	1	1	0	0	0	0	0	0	0	0	0	0	0	1	0	0
Q9NTG1	Q9NTG1	2	2	2	Polycystic kidney disease and receptor for egg jelly-related protein	PKDREJ	sp|Q9NTG1|PKDRE_HUMAN Polycystic kidney disease and receptor for egg jelly-related protein OS=Homo sapiens OX=9606 GN=PKDREJ PE=2 SV=2	1	2	2	2	0	0	0	0	1	0	0	1	0	0	0	0	0	0	1	#DIV/0!	0	0	0	0	0	0	0	0	1	1	0	0	0	0	0	0	0	0	0	0	1	0
Q9UHV9	Q9UHV9	2	2	2	Prefoldin subunit 2	PFDN2	sp|Q9UHV9|PFD2_HUMAN Prefoldin subunit 2 OS=Homo sapiens OX=9606 GN=PFDN2 PE=1 SV=1	1	2	2	2	0	0	0	0	1	0	0	0	0	0	0	0	0	0	1	#DIV/0!	0	0	0	0	0	0	0	0	1	0	0	0	1	0	0	0	0	0	0	0	1	0
Q9UQ80	Q9UQ80	2	2	2	Proliferation-associated protein 2G4	PA2G4	sp|Q9UQ80|PA2G4_HUMAN Proliferation-associated protein 2G4 OS=Homo sapiens OX=9606 GN=PA2G4 PE=1 SV=3	1	2	2	2	1	0	0	0	2	0	0	0	0	0	0	1	0	0	1	#DIV/0!	1	0	0	0	0	0	0	0	2	0	0	1	0	0	0	1	1	0	0	0	2	0
Q9Y3Y2	Q9Y3Y2	2	2	2	Chromatin target of PRMT1 protein	CHTOP	sp|Q9Y3Y2|CHTOP_HUMAN Chromatin target of PRMT1 protein OS=Homo sapiens OX=9606 GN=CHTOP PE=1 SV=2	1	2	2	2	0	0	0	0	0	0	0	0	0	0	0	2	0	0	1	#DIV/0!	0	0	0	0	0	0	0	0	0	0	0	2	1	0	0	0	0	0	0	0	0	0
Q9Y617	Q9Y617	2	2	2	Phosphoserine aminotransferase	PSAT1	sp|Q9Y617|SERC_HUMAN Phosphoserine aminotransferase OS=Homo sapiens OX=9606 GN=PSAT1 PE=1 SV=2	1	2	2	2	0	0	0	0	2	0	0	0	0	0	0	0	0	0	1	#DIV/0!	0	0	0	0	0	0	0	0	2	0	0	0	0	0	0	0	0	0	0	0	2	0
Q9Y6N7	Q9Y6N7	2	2	2	Roundabout homolog 1	ROBO1	sp|Q9Y6N7|ROBO1_HUMAN Roundabout homolog 1 OS=Homo sapiens OX=9606 GN=ROBO1 PE=1 SV=1	1	2	2	2	0	0	1	1	1	0	0	0	0	0	0	0	0	0	1	#DIV/0!	0	0	1	0	0	0	0	1	1	0	0	0	0	0	0	0	0	0	1	1	1	0
P60709;Q9BYX7	P60709	14;2	14;2	1;0	Actin, cytoplasmic 1	ACTB	sp|P60709|ACTB_HUMAN Actin, cytoplasmic 1 OS=Homo sapiens OX=9606 GN=ACTB PE=1 SV=1	2	14	14	1	4	3	8	6	12	4	10	10	12	9	5	7	6	8	1	1.2	4	3	8	4	10	9	8	6	12	10	12	7	8	5	6	6	1	0	1	1	1	1
P63261	P63261	14	1	1	Actin, cytoplasmic 2	ACTG1	sp|P63261|ACTG_HUMAN Actin, cytoplasmic 2 OS=Homo sapiens OX=9606 GN=ACTG1 PE=1 SV=1	1	14	1	1	4	3	8	6	12	3	10	10	12	9	5	6	5	8	1	1	1	0	1	0	1	1	1	1	1	1	1	0	1	1	0	1	1	0	1	1	1	0
P0C0S8;Q99878;Q9BTM1;Q93077;Q7L7L0;P04908;Q96KK5;P20671;P16104;Q8IUE6;Q96QV6	P0C0S8;Q99878;Q9BTM1;Q93077;Q7L7L0;P04908;Q96KK5;P20671;P16104;Q8IUE6;Q96QV6	4;4;4;4;4;4;4;4;3;2;2	4;4;4;4;4;4;4;4;3;2;2	1;1;1;1;1;1;1;1;1;1;0	Histone H2A type 1	HIST1H2AG	sp|P0C0S8|H2A1_HUMAN Histone H2A type 1 OS=Homo sapiens OX=9606 GN=HIST1H2AG PE=1 SV=2;sp|Q99878|H2A1J_HUMAN Histone H2A type 1-J OS=Homo sapiens OX=9606 GN=HIST1H2AJ PE=1 SV=3;sp|Q9BTM1|H2AJ_HUMAN Histone H2A.J OS=Homo sapiens OX=9606 GN=H2AFJ PE=1 SV=1;s	11	4	4	1	1	0	3	2	3	2	3	3	3	4	0	1	2	4	1	#DIV/0!	1	0	3	2	3	4	4	2	3	3	3	1	3	0	2	2	1	0	1	1	1	1
P16402	P16402	5	1	1	Histone H1.3	HIST1H1D	sp|P16402|H13_HUMAN Histone H1.3 OS=Homo sapiens OX=9606 GN=HIST1H1D PE=1 SV=2	1	5	1	1	1	1	1	1	3	2	1	2	4	4	1	2	2	3	1	2	0	0	0	1	0	1	1	0	0	0	1	1	0	0	0	0	0	0	0	0	0	1
P16403;Q02539;P22492	P16403	5;2;1	1;0;0	1;0;0	Histone H1.2	HIST1H1C	sp|P16403|H12_HUMAN Histone H1.2 OS=Homo sapiens OX=9606 GN=HIST1H1C PE=1 SV=2	3	5	1	1	1	1	2	2	4	1	1	2	4	4	1	2	3	2	1	3	0	0	1	0	0	1	0	1	1	0	1	1	0	0	1	1	0	0	1	1	1	0
Q6FI13;Q16777	Q6FI13;Q16777	4;4	1;1	1;1	Histone H2A type 2-A	HIST2H2AA3	sp|Q6FI13|H2A2A_HUMAN Histone H2A type 2-A OS=Homo sapiens OX=9606 GN=HIST2H2AA3 PE=1 SV=3;sp|Q16777|H2A2C_HUMAN Histone H2A type 2-C OS=Homo sapiens OX=9606 GN=HIST2H2AC PE=1 SV=4	2	4	1	1	0	0	2	1	2	1	2	2	4	3	0	0	1	3	1	#DIV/0!	0	0	0	0	0	0	0	0	0	0	1	0	0	0	0	0	0	0	0	0	0	0
Q58FF8	Q58FF8	6	1	1	Putative heat shock protein HSP 90-beta 2	HSP90AB2P	sp|Q58FF8|H90B2_HUMAN Putative heat shock protein HSP 90-beta 2 OS=Homo sapiens OX=9606 GN=HSP90AB2P PE=1 SV=2	1	6	1	1	1	0	0	1	6	0	3	2	1	3	0	1	1	1	1	#DIV/0!	0	0	0	0	0	0	0	0	1	0	1	0	1	0	0	0	0	0	0	0	1	0
Q6S8J3;A5A3E0;P0CG38;P0CG39	Q6S8J3;A5A3E0;P0CG38;P0CG39	7;6;5;4	1;1;1;1	1;1;1;1	POTE ankyrin domain family member E	POTEE	sp|Q6S8J3|POTEE_HUMAN POTE ankyrin domain family member E OS=Homo sapiens OX=9606 GN=POTEE PE=2 SV=3;sp|A5A3E0|POTEF_HUMAN POTE ankyrin domain family member F OS=Homo sapiens OX=9606 GN=POTEF PE=1 SV=2;sp|P0CG38|POTEI_HUMAN POTE ankyrin domain family membe	4	7	1	1	1	0	3	3	4	1	5	4	6	3	1	3	2	4	1	2	0	0	0	0	0	0	0	0	0	0	1	0	0	0	0	0	0	0	0	0	0	0
P17066;P48741	P17066;P48741	3;2	1;1	1;1	Heat shock 70 kDa protein 6	HSPA6	sp|P17066|HSP76_HUMAN Heat shock 70 kDa protein 6 OS=Homo sapiens OX=9606 GN=HSPA6 PE=1 SV=2;sp|P48741|HSP77_HUMAN Putative heat shock 70 kDa protein 7 OS=Homo sapiens OX=9606 GN=HSPA7 PE=5 SV=2	2	3	1	1	1	0	1	1	2	0	1	0	2	2	1	2	1	1	1	1	1	0	1	0	1	1	1	1	1	0	1	1	0	1	1	1	1	0	1	1	1	0
Q05639	Q05639	6	1	1	Elongation factor 1-alpha 2	EEF1A2	sp|Q05639|EF1A2_HUMAN Elongation factor 1-alpha 2 OS=Homo sapiens OX=9606 GN=EEF1A2 PE=1 SV=1	1	6	1	1	0	1	0	0	5	1	4	2	1	2	2	0	0	1	1	0	0	0	0	0	0	0	0	0	1	0	0	0	0	0	0	0	0	0	0	0	1	0
Q562R1	Q562R1	4	1	1	Beta-actin-like protein 2	ACTBL2	sp|Q562R1|ACTBL_HUMAN Beta-actin-like protein 2 OS=Homo sapiens OX=9606 GN=ACTBL2 PE=1 SV=2	1	4	1	1	0	0	0	1	4	1	2	1	2	2	0	1	1	1	1	#DIV/0!	0	0	0	0	0	0	0	0	1	0	0	0	0	0	0	0	0	0	0	0	1	0
P07942	P07942	1	1	1	Laminin subunit beta-1	LAMB1	sp|P07942|LAMB1_HUMAN Laminin subunit beta-1 OS=Homo sapiens OX=9606 GN=LAMB1 PE=1 SV=2	1	1	1	1	1	1	1	1	1	1	1	1	1	1	1	1	1	1	1	1	1	1	1	1	1	1	1	1	1	1	1	1	1	1	1	1	1	1	1	1	1	1
Q9NQ36	Q9NQ36	1	1	1	Signal peptide, CUB and EGF-like domain-containing protein 2	SCUBE2	sp|Q9NQ36|SCUB2_HUMAN Signal peptide, CUB and EGF-like domain-containing protein 2 OS=Homo sapiens OX=9606 GN=SCUBE2 PE=1 SV=3	1	1	1	1	1	1	1	1	1	1	1	1	1	1	1	1	1	1	1	1	1	1	1	1	1	1	1	1	1	1	1	1	1	1	1	1	1	1	1	1	1	1
P01880;P0DOX3	P01880;P0DOX3	1;1	1;1	1;1	Ig delta chain C region	IGHD	sp|P01880|IGHD_HUMAN Immunoglobulin heavy constant delta OS=Homo sapiens OX=9606 GN=IGHD PE=1 SV=3;sp|P0DOX3|IGD_HUMAN Immunoglobulin delta heavy chain OS=Homo sapiens OX=9606 PE=1 SV=1	2	1	1	1	0	1	0	1	1	1	0	1	1	1	1	1	0	1	1	0	0	1	0	1	0	1	1	1	1	1	1	1	0	1	0	0	0	1	0	1	1	1
P0DOX2;A0A0J9YX35;A0A0A0MS15;A0A0B4J1V0;A0A0B4J1V6;A0A0B4J1Y9;A0A075B6Q5;P0DP04;A0A0B4J1X8;A0A0C4DH32;P0DP03;A0A0B4J1X5;A0A0B4J1V1;P0DP02;A0A0C4DH42;P01763;P01766;P01764;P01768;P01772;P01780;P01782;P01762;P01767	P0DOX2;A0A0J9YX35;A0A0A0MS15;A0A0B4J1V0;A0A0B4J1V6;A0A0B4J1Y9;A0A075B6Q5;P0DP04;A0A0B4J1X8;A0A0C4DH32;P0DP03;A0A0B4J1X5;A0A0B4J1V1;P0DP02;A0A0C4DH42;P01763;P01766;P01764;P01768;P01772;P01780;P01782;P01762;P01767	1;1;1;1;1;1;1;1;1;1;1;1;1;1;1;1;1;1;1;1;1;1;1;1	1;1;1;1;1;1;1;1;1;1;1;1;1;1;1;1;1;1;1;1;1;1;1;1	1;1;1;1;1;1;1;1;1;1;1;1;1;1;1;1;1;1;1;1;1;1;1;1	Ig heavy chain V-III region WEA	IGHV3-49	sp|P0DOX2|IGA2_HUMAN Immunoglobulin alpha-2 heavy chain OS=Homo sapiens OX=9606 PE=1 SV=2;sp|A0A0J9YX35|HV64D_HUMAN Immunoglobulin heavy variable 3-64D OS=Homo sapiens OX=9606 GN=IGHV3-64D PE=3 SV=1;sp|A0A0A0MS15|HV349_HUMAN Immunoglobulin heavy variable 3	24	1	1	1	0	1	0	1	0	1	0	1	0	1	0	1	0	1	1	#DIV/0!	0	1	0	1	0	1	1	1	0	1	0	1	1	0	0	0	0	1	0	1	0	1
Q6UWX4	Q6UWX4	1	1	1	HHIP-like protein 2	HHIPL2	sp|Q6UWX4|HIPL2_HUMAN HHIP-like protein 2 OS=Homo sapiens OX=9606 GN=HHIPL2 PE=1 SV=1	1	1	1	1	0	1	0	1	0	1	0	1	0	1	0	1	0	1	1	#DIV/0!	0	1	0	1	0	1	1	1	0	1	0	1	1	0	0	0	0	1	0	1	0	1
P27283	P27283	1	1	1			sp|P27283|POLN_SINDO Non-structural polyprotein OS=Sindbis virus subtype Ockelbo (strain Edsbyn 82-5) OX=31699 PE=2 SV=1	1	1	1	1	1	1	1	1	1	1	1	1	1	1	1	1	1	1	1	1	1	1	1	1	1	1	1	1	1	1	1	1	1	1	1	0	1	1	1	1	1	1
Q92834	Q92834	1	1	1	X-linked retinitis pigmentosa GTPase regulator	RPGR	sp|Q92834|RPGR_HUMAN X-linked retinitis pigmentosa GTPase regulator OS=Homo sapiens OX=9606 GN=RPGR PE=1 SV=2	1	1	1	1	0	1	0	0	0	1	0	0	0	1	0	1	0	0	1	#DIV/0!	0	1	0	1	0	1	0	0	0	0	0	1	1	0	0	0	0	1	0	0	0	1
Q68DL7	Q68DL7	1	1	1	Uncharacterized protein C18orf63	C18orf63	sp|Q68DL7|CR063_HUMAN Uncharacterized protein C18orf63 OS=Homo sapiens OX=9606 GN=C18orf63 PE=2 SV=2	1	1	1	1	1	1	1	1	1	1	1	1	1	1	1	1	1	1	1	1	1	1	1	1	1	1	1	1	1	1	1	1	1	1	1	1	1	1	1	1	1	1
Q6PKX4	Q6PKX4	1	1	1	Docking protein 6	DOK6	sp|Q6PKX4|DOK6_HUMAN Docking protein 6 OS=Homo sapiens OX=9606 GN=DOK6 PE=1 SV=1	1	1	1	1	1	1	1	1	1	0	0	0	0	1	0	1	1	0	1	#DIV/0!	1	1	1	0	0	1	0	1	1	0	0	1	0	0	1	0	1	1	1	1	1	0
Q5RHP9;REV__P04070;P54634	Q5RHP9;REV__P04070;P54634	1;1;1	1;1;1	1;1;1	Glutamate-rich protein 3	ERICH3	sp|Q5RHP9|ERIC3_HUMAN Glutamate-rich protein 3 OS=Homo sapiens OX=9606 GN=ERICH3 PE=2 SV=1;sp|P04070|PROC_HUMAN Vitamin K-dependent protein C OS=Homo sapiens OX=9606 GN=PROC PE=1 SV=1;sp|P54634|POLG_LORDV Genome polyprotein OS=Lordsdale virus (strain GII/H	3	1	1	1	1	1	1	1	1	1	1	1	1	1	1	1	1	1	1	1	1	1	1	1	1	1	1	1	1	1	1	1	1	1	1	1	1	1	1	1	1	1
Q8NHH1	Q8NHH1	1	1	1	Tubulin polyglutamylase TTLL11	TTLL11	sp|Q8NHH1|TTL11_HUMAN Tubulin polyglutamylase TTLL11 OS=Homo sapiens OX=9606 GN=TTLL11 PE=1 SV=2	1	1	1	1	1	1	1	1	1	1	1	1	0	1	1	0	1	1	1	1	1	1	1	1	1	1	1	1	1	1	0	0	1	1	1	1	1	1	1	1	1	1
Q07889	Q07889	1	1	1	Son of sevenless homolog 1	SOS1	sp|Q07889|SOS1_HUMAN Son of sevenless homolog 1 OS=Homo sapiens OX=9606 GN=SOS1 PE=1 SV=1	1	1	1	1	1	1	1	0	0	0	0	0	1	1	1	0	0	1	1	0	1	1	1	0	0	1	1	0	0	0	1	0	0	1	0	0	1	1	1	0	0	0
A0A0C4DH67;A0A0C4DH69;A0A075B6S5	A0A0C4DH67;A0A0C4DH69;A0A075B6S5	1;1;1	1;1;1	1;1;1		IGKV1-8	sp|A0A0C4DH67|KV108_HUMAN Immunoglobulin kappa variable 1-8 OS=Homo sapiens OX=9606 GN=IGKV1-8 PE=3 SV=1;sp|A0A0C4DH69|KV109_HUMAN Immunoglobulin kappa variable 1-9 OS=Homo sapiens OX=9606 GN=IGKV1-9 PE=3 SV=1;sp|A0A075B6S5|KV127_HUMAN Immunoglobulin kappa	3	1	1	1	0	1	0	1	0	1	0	1	0	1	0	1	0	1	1	#DIV/0!	0	1	0	1	0	1	1	1	0	1	0	1	1	0	0	0	0	1	0	1	0	1
P0DP09;A0A0B4J2D9	P0DP09;A0A0B4J2D9	1;1	1;1	1;1		IGKV1D-13	sp|P0DP09|KV113_HUMAN Immunoglobulin kappa variable 1-13 OS=Homo sapiens OX=9606 GN=IGKV1-13 PE=3 SV=1;sp|A0A0B4J2D9|KVD13_HUMAN Immunoglobulin kappa variable 1D-13 OS=Homo sapiens OX=9606 GN=IGKV1D-13 PE=3 SV=1	2	1	1	1	0	0	0	0	0	0	0	0	0	1	0	0	0	0	1	#DIV/0!	0	0	0	0	0	1	0	0	0	0	0	0	0	0	0	0	0	0	0	0	0	0
A0A0C4DH73;A0A0C4DH72;P04432;P01611;P01597	A0A0C4DH73;A0A0C4DH72;P04432;P01611;P01597	1;1;1;1;1	1;1;1;1;1	1;1;1;1;1	Ig kappa chain V-I region Daudi	IGKV1-12	sp|A0A0C4DH73|KV112_HUMAN Immunoglobulin kappa variable 1-12 OS=Homo sapiens OX=9606 GN=IGKV1-12 PE=3 SV=1;sp|A0A0C4DH72|KV106_HUMAN Immunoglobulin kappa variable 1-6 OS=Homo sapiens OX=9606 GN=IGKV1-6 PE=3 SV=1;sp|P04432|KVD39_HUMAN Immunoglobulin kappa v	5	1	1	1	0	1	0	1	0	0	0	1	0	1	0	1	0	1	1	#DIV/0!	0	1	0	0	0	1	1	1	0	1	0	1	1	0	0	0	0	1	0	1	0	0
P15814;A0M8Q6;P0CF74	P15814;A0M8Q6;P0CF74	1;1;1	1;1;1	1;1;1	Immunoglobulin lambda-like polypeptide 1	IGLL1	sp|P15814|IGLL1_HUMAN Immunoglobulin lambda-like polypeptide 1 OS=Homo sapiens OX=9606 GN=IGLL1 PE=1 SV=1;sp|A0M8Q6|IGLC7_HUMAN Immunoglobulin lambda constant 7 OS=Homo sapiens OX=9606 GN=IGLC7 PE=1 SV=3;sp|P0CF74|IGLC6_HUMAN Immunoglobulin lambda constant	3	1	1	1	0	0	0	1	0	1	0	0	0	1	0	1	0	1	1	#DIV/0!	0	0	0	1	0	1	1	1	0	0	0	1	1	0	0	0	0	0	0	1	0	1
A9Q1K7	A9Q1K7	1	1	1			sp|A9Q1K7|RDRP_ROTB2 RNA-directed RNA polymerase OS=Rotavirus X (isolate RVX/Human/Bangladesh/NADRV-B219/2002/GXP[X]) OX=348136 PE=2 SV=1	1	1	1	1	0	0	0	0	0	0	0	0	0	1	0	0	0	0	1	#DIV/0!	0	0	0	0	0	1	0	0	0	0	0	0	0	0	0	0	0	0	0	0	0	0
Q14390;B5MD39	Q14390;B5MD39	1;1	1;1	1;1	Gamma-glutamyltransferase light chain 2	GGTLC2	sp|Q14390|GGTL2_HUMAN Glutathione hydrolase light chain 2 OS=Homo sapiens OX=9606 GN=GGTLC2 PE=2 SV=4;sp|B5MD39|GGTL3_HUMAN Putative glutathione hydrolase light chain 3 OS=Homo sapiens OX=9606 GN=GGTLC3 PE=5 SV=1	2	1	1	1	0	0	0	0	0	0	0	0	0	1	0	0	0	0	1	#DIV/0!	0	0	0	0	0	1	0	0	0	0	0	0	0	0	0	0	0	0	0	0	0	0
O14638	O14638	1	1	1	Ectonucleotide pyrophosphatase/phosphodiesterase family member 3	ENPP3	sp|O14638|ENPP3_HUMAN Ectonucleotide pyrophosphatase/phosphodiesterase family member 3 OS=Homo sapiens OX=9606 GN=ENPP3 PE=1 SV=2	1	1	1	1	0	0	0	0	0	0	0	0	0	1	0	0	1	0	1	#DIV/0!	0	0	0	0	0	1	0	0	0	0	0	0	0	0	1	0	0	0	0	0	0	0
O14990	O14990	1	1	1	Putative type-1 protein phosphatase inhibitor 4	PPP1R2P9	sp|O14990|IPP2C_HUMAN Protein phosphatase inhibitor 2 family member C OS=Homo sapiens OX=9606 GN=PPP1R2C PE=1 SV=1	1	1	1	1	1	1	1	1	0	1	0	1	0	1	1	0	1	1	1	1	1	1	1	1	0	1	1	1	0	1	0	0	0	1	1	0	1	1	1	1	0	1
O15178	O15178	1	1	1	Brachyury protein	T	sp|O15178|TBXT_HUMAN T-box transcription factor T OS=Homo sapiens OX=9606 GN=TBXT PE=1 SV=1	1	1	1	1	0	0	0	0	0	0	0	0	0	1	0	0	0	0	1	#DIV/0!	0	0	0	0	0	1	0	0	0	0	0	0	0	0	0	0	0	0	0	0	0	0
O60437	O60437	1	1	1	Periplakin	PPL	sp|O60437|PEPL_HUMAN Periplakin OS=Homo sapiens OX=9606 GN=PPL PE=1 SV=4	1	1	1	1	0	0	0	1	0	1	0	1	0	1	0	1	0	1	1	#DIV/0!	0	0	0	1	0	1	1	1	0	1	0	1	1	0	0	0	0	0	0	1	0	1
P68871;P02042	P68871;P02042	2;2	1;1	1;1	Hemoglobin subunit beta	HBB	sp|P68871|HBB_HUMAN Hemoglobin subunit beta OS=Homo sapiens OX=9606 GN=HBB PE=1 SV=2;sp|P02042|HBD_HUMAN Hemoglobin subunit delta OS=Homo sapiens OX=9606 GN=HBD PE=1 SV=2	2	2	1	1	0	0	0	0	0	0	0	2	0	1	0	0	0	0	1	#DIV/0!	0	0	0	0	0	1	0	0	0	1	0	0	0	0	0	0	0	0	0	0	0	0
P03303	P03303	1	1	1			sp|P03303|POLG_HRV14 Genome polyprotein OS=Human rhinovirus 14 OX=12131 PE=1 SV=3	1	1	1	1	0	0	0	1	0	1	0	0	0	1	0	1	0	0	1	#DIV/0!	0	0	0	1	0	1	0	1	0	0	0	1	1	0	0	0	0	0	0	1	0	1
P05141;P12235;Q9H0C2	P05141;P12235;Q9H0C2	3;2;2	3;2;2	1;0;0	ADP/ATP translocase 2	SLC25A5	sp|P05141|ADT2_HUMAN ADP/ATP translocase 2 OS=Homo sapiens OX=9606 GN=SLC25A5 PE=1 SV=7;sp|P12235|ADT1_HUMAN ADP/ATP translocase 1 OS=Homo sapiens OX=9606 GN=SLC25A4 PE=1 SV=4;sp|Q9H0C2|ADT4_HUMAN ADP/ATP translocase 4 OS=Homo sapiens OX=9606 GN=SLC25A31 P	3	3	3	1	1	1	1	0	3	0	2	0	1	1	1	2	0	1	1	0	1	1	1	0	2	1	1	0	3	0	1	2	1	1	0	0	1	1	1	0	1	0
P06312	P06312	1	1	1	Ig kappa chain V-IV region	IGKV4-1	sp|P06312|KV401_HUMAN Immunoglobulin kappa variable 4-1 OS=Homo sapiens OX=9606 GN=IGKV4-1 PE=1 SV=1	1	1	1	1	0	0	0	0	0	0	0	1	0	1	0	0	0	0	1	#DIV/0!	0	0	0	0	0	1	0	0	0	1	0	0	0	0	0	0	0	0	0	0	0	0
P12018	P12018	1	1	1	Immunoglobulin iota chain	VPREB1	sp|P12018|VPREB_HUMAN Immunoglobulin iota chain OS=Homo sapiens OX=9606 GN=VPREB1 PE=1 SV=2	1	1	1	1	0	0	0	1	0	1	0	0	0	1	0	1	0	1	1	#DIV/0!	0	0	0	1	0	1	1	1	0	0	0	1	0	0	0	0	0	0	0	1	0	1
P18621	P18621	1	1	1	60S ribosomal protein L17	RPL17	sp|P18621|RL17_HUMAN 60S ribosomal protein L17 OS=Homo sapiens OX=9606 GN=RPL17 PE=1 SV=3	1	1	1	1	0	0	0	0	0	0	1	0	0	1	0	0	0	1	1	#DIV/0!	0	0	0	0	1	1	1	0	0	0	0	0	0	0	0	0	0	0	0	0	0	0
P18858	P18858	1	1	1	DNA ligase 1	LIG1	sp|P18858|DNLI1_HUMAN DNA ligase 1 OS=Homo sapiens OX=9606 GN=LIG1 PE=1 SV=1	1	1	1	1	0	0	0	0	0	0	0	0	0	1	0	1	0	0	1	#DIV/0!	0	0	0	0	0	1	0	0	0	0	0	1	0	0	0	0	0	0	0	0	0	0
P19823	P19823	1	1	1	Inter-alpha-trypsin inhibitor heavy chain H2	ITIH2	sp|P19823|ITIH2_HUMAN Inter-alpha-trypsin inhibitor heavy chain H2 OS=Homo sapiens OX=9606 GN=ITIH2 PE=1 SV=2	1	1	1	1	1	0	1	1	0	1	1	1	0	1	1	1	0	0	1	0	1	0	1	1	1	1	0	1	0	1	0	1	1	1	0	0	1	0	1	1	0	1
P21589	P21589	1	1	1	5-nucleotidase	NT5E	sp|P21589|5NTD_HUMAN 5-nucleotidase OS=Homo sapiens OX=9606 GN=NT5E PE=1 SV=1	1	1	1	1	0	0	0	0	0	0	0	0	0	1	0	0	0	0	1	#DIV/0!	0	0	0	0	0	1	0	0	0	0	0	0	0	0	0	0	0	0	0	0	0	0
P21796	P21796	1	1	1	Voltage-dependent anion-selective channel protein 1	VDAC1	sp|P21796|VDAC1_HUMAN Voltage-dependent anion-selective channel protein 1 OS=Homo sapiens OX=9606 GN=VDAC1 PE=1 SV=2	1	1	1	1	0	0	0	0	1	0	0	0	0	1	0	0	0	0	1	#DIV/0!	0	0	0	0	0	1	0	0	1	0	0	0	0	0	0	0	0	0	0	0	1	0
P23526	P23526	1	1	1	Adenosylhomocysteinase	AHCY	sp|P23526|SAHH_HUMAN Adenosylhomocysteinase OS=Homo sapiens OX=9606 GN=AHCY PE=1 SV=4	1	1	1	1	1	0	0	0	1	0	1	0	0	1	0	1	0	0	1	#DIV/0!	1	0	0	0	1	1	0	0	1	0	0	1	0	0	0	0	1	0	0	0	1	0
P25398	P25398	1	1	1	40S ribosomal protein S12	RPS12	sp|P25398|RS12_HUMAN 40S ribosomal protein S12 OS=Homo sapiens OX=9606 GN=RPS12 PE=1 SV=3	1	1	1	1	0	0	0	0	1	0	1	0	0	1	0	1	0	0	1	#DIV/0!	0	0	0	0	1	1	0	0	1	0	0	1	0	0	0	0	0	0	0	0	1	0
P28074	P28074	1	1	1	Proteasome subunit beta type-5	PSMB5	sp|P28074|PSB5_HUMAN Proteasome subunit beta type-5 OS=Homo sapiens OX=9606 GN=PSMB5 PE=1 SV=3	1	1	1	1	0	0	0	0	0	0	0	0	0	1	0	0	0	0	1	#DIV/0!	0	0	0	0	0	1	0	0	0	0	0	0	0	0	0	0	0	0	0	0	0	0
P31946	P31946	3	1	1	14-3-3 protein beta/alpha	YWHAB	sp|P31946|1433B_HUMAN 14-3-3 protein beta/alpha OS=Homo sapiens OX=9606 GN=YWHAB PE=1 SV=3	1	3	1	1	0	1	0	0	2	0	0	1	0	1	0	1	0	0	1	#DIV/0!	0	0	0	0	0	0	0	0	1	0	0	1	0	0	0	0	0	0	0	0	1	0
P33240	P33240	3	1	1	Cleavage stimulation factor subunit 2	CSTF2	sp|P33240|CSTF2_HUMAN Cleavage stimulation factor subunit 2 OS=Homo sapiens OX=9606 GN=CSTF2 PE=1 SV=1	1	3	1	1	0	0	0	0	0	0	0	1	0	1	0	1	0	1	1	#DIV/0!	0	0	0	0	0	0	0	0	0	0	0	1	0	0	0	0	0	0	0	0	0	0
P35368	P35368	1	1	1	Alpha-1B adrenergic receptor	ADRA1B	sp|P35368|ADA1B_HUMAN Alpha-1B adrenergic receptor OS=Homo sapiens OX=9606 GN=ADRA1B PE=1 SV=3	1	1	1	1	0	0	1	1	0	0	0	0	0	1	0	1	0	1	1	#DIV/0!	0	0	1	0	0	1	1	1	0	0	0	1	0	0	0	0	0	0	1	1	0	0
Q92804;P35637	Q92804;P35637	1;1	1;1	1;1	TATA-binding protein-associated factor 2N	TAF15	sp|Q92804|RBP56_HUMAN TATA-binding protein-associated factor 2N OS=Homo sapiens OX=9606 GN=TAF15 PE=1 SV=1;sp|P35637|FUS_HUMAN RNA-binding protein FUS OS=Homo sapiens OX=9606 GN=FUS PE=1 SV=1	2	1	1	1	0	0	0	0	0	0	0	0	0	1	0	0	0	0	1	#DIV/0!	0	0	0	0	0	1	0	0	0	0	0	0	0	0	0	0	0	0	0	0	0	0
P46778	P46778	1	1	1	60S ribosomal protein L21	RPL21	sp|P46778|RL21_HUMAN 60S ribosomal protein L21 OS=Homo sapiens OX=9606 GN=RPL21 PE=1 SV=2	1	1	1	1	0	0	0	0	0	0	0	0	0	1	0	0	0	0	1	#DIV/0!	0	0	0	0	0	1	0	0	0	0	0	0	0	0	0	0	0	0	0	0	0	0
P50772	P50772	1	1	1			sp|P50772|VE2_HPV29 Regulatory protein E2 OS=Human papillomavirus type 29 OX=37112 GN=E2 PE=3 SV=1	1	1	1	1	0	0	0	0	0	0	0	0	0	1	0	0	0	0	1	#DIV/0!	0	0	0	0	0	1	0	0	0	0	0	0	0	0	0	0	0	0	0	0	0	0
P60866	P60866	1	1	1	40S ribosomal protein S20	RPS20	sp|P60866|RS20_HUMAN 40S ribosomal protein S20 OS=Homo sapiens OX=9606 GN=RPS20 PE=1 SV=1	1	1	1	1	0	0	0	0	1	0	1	0	0	1	0	0	0	0	1	#DIV/0!	0	0	0	0	1	1	0	0	1	0	0	0	0	0	0	0	0	0	0	0	1	0
P60953	P60953	1	1	1	Cell division control protein 42 homolog	CDC42	sp|P60953|CDC42_HUMAN Cell division control protein 42 homolog OS=Homo sapiens OX=9606 GN=CDC42 PE=1 SV=2	1	1	1	1	0	0	0	1	0	0	0	0	0	1	0	1	0	0	1	#DIV/0!	0	0	0	0	0	1	0	1	0	0	0	1	0	0	0	0	0	0	0	1	0	0
P61313	P61313	1	1	1	60S ribosomal protein L15	RPL15	sp|P61313|RL15_HUMAN 60S ribosomal protein L15 OS=Homo sapiens OX=9606 GN=RPL15 PE=1 SV=2	1	1	1	1	0	0	0	0	1	0	0	0	0	1	0	0	0	0	1	#DIV/0!	0	0	0	0	0	1	0	0	1	0	0	0	0	0	0	0	0	0	0	0	1	0
P62888	P62888	1	1	1	60S ribosomal protein L30	RPL30	sp|P62888|RL30_HUMAN 60S ribosomal protein L30 OS=Homo sapiens OX=9606 GN=RPL30 PE=1 SV=2	1	1	1	1	0	0	0	0	0	0	0	0	0	1	0	0	0	0	1	#DIV/0!	0	0	0	0	0	1	0	0	0	0	0	0	0	0	0	0	0	0	0	0	0	0
P62899	P62899	1	1	1	60S ribosomal protein L31	RPL31	sp|P62899|RL31_HUMAN 60S ribosomal protein L31 OS=Homo sapiens OX=9606 GN=RPL31 PE=1 SV=1	1	1	1	1	0	0	0	0	1	0	0	0	0	1	0	0	0	0	1	#DIV/0!	0	0	0	0	0	1	0	0	1	0	0	0	0	0	0	0	0	0	0	0	1	0
P62910	P62910	1	1	1	60S ribosomal protein L32	RPL32	sp|P62910|RL32_HUMAN 60S ribosomal protein L32 OS=Homo sapiens OX=9606 GN=RPL32 PE=1 SV=2	1	1	1	1	0	0	0	0	1	0	0	0	0	1	0	0	0	0	1	#DIV/0!	0	0	0	0	0	1	0	0	1	0	0	0	0	0	0	0	0	0	0	0	1	0
P62913	P62913	1	1	1	60S ribosomal protein L11	RPL11	sp|P62913|RL11_HUMAN 60S ribosomal protein L11 OS=Homo sapiens OX=9606 GN=RPL11 PE=1 SV=2	1	1	1	1	0	0	0	0	1	0	1	1	0	1	0	0	0	0	1	#DIV/0!	0	0	0	0	1	1	0	0	1	1	0	0	0	0	0	0	0	0	0	0	1	0
P69277	P69277	1	1	1			sp|P69277|NS1_I68A0 Non-structural protein 1 OS=Influenza A virus (strain A/Aichi/2/1968 H3N2) OX=387139 GN=NS PE=3 SV=1	1	1	1	1	1	0	1	1	1	0	1	0	1	1	1	1	1	0	1	1	1	0	1	0	1	1	0	1	1	0	1	1	1	1	1	1	1	0	1	1	1	0
Q03001	Q03001	2	1	1	Dystonin	DST	sp|Q03001|DYST_HUMAN Dystonin OS=Homo sapiens OX=9606 GN=DST PE=1 SV=4	1	2	1	1	0	0	0	0	0	0	0	0	0	1	1	0	0	0	1	0	0	0	0	0	0	0	0	0	0	0	0	0	0	1	0	0	0	0	0	0	0	0
Q08379	Q08379	1	1	1	Golgin subfamily A member 2	GOLGA2	sp|Q08379|GOGA2_HUMAN Golgin subfamily A member 2 OS=Homo sapiens OX=9606 GN=GOLGA2 PE=1 SV=3	1	1	1	1	1	1	1	1	0	1	1	1	1	1	1	1	1	1	1	1	1	1	1	1	1	1	1	1	0	1	1	1	1	1	1	0	1	1	1	1	0	1
Q08945	Q08945	1	1	1	FACT complex subunit SSRP1	SSRP1	sp|Q08945|SSRP1_HUMAN FACT complex subunit SSRP1 OS=Homo sapiens OX=9606 GN=SSRP1 PE=1 SV=1	1	1	1	1	1	0	1	0	0	0	0	0	0	1	0	0	0	0	1	#DIV/0!	1	0	1	0	0	1	0	0	0	0	0	0	0	0	0	0	1	0	1	0	0	0
Q12792	Q12792	1	1	1	Twinfilin-1	TWF1	sp|Q12792|TWF1_HUMAN Twinfilin-1 OS=Homo sapiens OX=9606 GN=TWF1 PE=1 SV=3	1	1	1	1	0	0	0	0	1	0	0	0	0	1	0	0	0	0	1	#DIV/0!	0	0	0	0	0	1	0	0	1	0	0	0	0	0	0	0	0	0	0	0	1	0
Q14126	Q14126	1	1	1	Desmoglein-2	DSG2	sp|Q14126|DSG2_HUMAN Desmoglein-2 OS=Homo sapiens OX=9606 GN=DSG2 PE=1 SV=2	1	1	1	1	0	0	0	0	1	0	0	0	0	1	0	0	0	0	1	#DIV/0!	0	0	0	0	0	1	0	0	1	0	0	0	0	0	0	0	0	0	0	0	1	0
Q15042	Q15042	1	1	1	Rab3 GTPase-activating protein catalytic subunit	RAB3GAP1	sp|Q15042|RB3GP_HUMAN Rab3 GTPase-activating protein catalytic subunit OS=Homo sapiens OX=9606 GN=RAB3GAP1 PE=1 SV=3	1	1	1	1	1	1	1	1	1	1	1	1	1	1	1	1	1	1	1	1	1	1	1	1	1	1	1	1	1	1	1	1	1	1	1	1	1	1	1	1	1	1
Q15046	Q15046	1	1	1	Lysine--tRNA ligase	KARS	sp|Q15046|SYK_HUMAN Lysine--tRNA ligase OS=Homo sapiens OX=9606 GN=KARS PE=1 SV=3	1	1	1	1	0	0	0	0	0	1	0	0	0	1	1	0	0	1	1	0	0	0	0	1	0	1	1	0	0	0	0	0	1	1	0	0	0	0	0	0	0	1
Q15293	Q15293	1	1	1	Reticulocalbin-1	RCN1	sp|Q15293|RCN1_HUMAN Reticulocalbin-1 OS=Homo sapiens OX=9606 GN=RCN1 PE=1 SV=1	1	1	1	1	0	0	0	1	1	0	0	0	0	1	0	1	0	0	1	#DIV/0!	0	0	0	0	0	1	0	1	1	0	0	1	0	0	0	0	0	0	0	1	1	0
Q15366	Q15366	2	1	1	Poly(rC)-binding protein 2	PCBP2	sp|Q15366|PCBP2_HUMAN Poly(rC)-binding protein 2 OS=Homo sapiens OX=9606 GN=PCBP2 PE=1 SV=1	1	2	1	1	0	0	1	1	2	0	1	0	0	1	0	1	0	0	1	#DIV/0!	0	0	0	0	0	0	0	0	1	0	0	0	0	0	0	0	0	0	0	0	1	0
Q99439;Q15417	Q99439;Q15417	1;1	1;1	1;1	Calponin-2	CNN2	sp|Q99439|CNN2_HUMAN Calponin-2 OS=Homo sapiens OX=9606 GN=CNN2 PE=1 SV=4;sp|Q15417|CNN3_HUMAN Calponin-3 OS=Homo sapiens OX=9606 GN=CNN3 PE=1 SV=1	2	1	1	1	0	0	0	0	0	0	0	0	0	1	0	1	0	0	1	#DIV/0!	0	0	0	0	0	1	0	0	0	0	0	1	0	0	0	0	0	0	0	0	0	0
Q5SSJ5	Q5SSJ5	1	1	1	Heterochromatin protein 1-binding protein 3	HP1BP3	sp|Q5SSJ5|HP1B3_HUMAN Heterochromatin protein 1-binding protein 3 OS=Homo sapiens OX=9606 GN=HP1BP3 PE=1 SV=1	1	1	1	1	0	0	0	0	0	0	0	0	0	1	0	0	0	0	1	#DIV/0!	0	0	0	0	0	1	0	0	0	0	0	0	0	0	0	0	0	0	0	0	0	0
Q5SW79	Q5SW79	1	1	1	Centrosomal protein of 170 kDa	CEP170	sp|Q5SW79|CE170_HUMAN Centrosomal protein of 170 kDa OS=Homo sapiens OX=9606 GN=CEP170 PE=1 SV=1	1	1	1	1	0	0	0	0	0	0	0	0	0	1	0	0	0	0	1	#DIV/0!	0	0	0	0	0	1	0	0	0	0	0	0	0	0	0	0	0	0	0	0	0	0
Q66K80	Q66K80	1	1	1	Putative uncharacterized protein RUSC1-AS1	RUSC1-AS1	sp|Q66K80|RUAS1_HUMAN Putative uncharacterized protein RUSC1-AS1 OS=Homo sapiens OX=9606 GN=RUSC1-AS1 PE=5 SV=1	1	1	1	1	0	0	0	1	0	0	0	0	0	1	0	1	0	1	1	#DIV/0!	0	0	0	0	0	1	1	1	0	0	0	1	1	0	0	0	0	0	0	1	0	0
Q6S5L8	Q6S5L8	1	1	1	SHC-transforming protein 4	SHC4	sp|Q6S5L8|SHC4_HUMAN SHC-transforming protein 4 OS=Homo sapiens OX=9606 GN=SHC4 PE=1 SV=1	1	1	1	1	1	1	1	1	0	1	1	1	0	1	1	1	1	1	1	1	1	1	1	1	1	1	1	1	0	1	0	1	1	1	1	1	1	1	1	1	0	1
Q6WCQ1	Q6WCQ1	1	1	1	Myosin phosphatase Rho-interacting protein	MPRIP	sp|Q6WCQ1|MPRIP_HUMAN Myosin phosphatase Rho-interacting protein OS=Homo sapiens OX=9606 GN=MPRIP PE=1 SV=3	1	1	1	1	0	0	0	0	0	0	0	0	0	1	0	1	0	0	1	#DIV/0!	0	0	0	0	0	1	0	0	0	0	0	1	0	0	0	0	0	0	0	0	0	0
Q74120	Q74120	1	1	1			sp|Q74120|POL_HV2KR Gag-Pol polyprotein OS=Human immunodeficiency virus type 2 subtype A (isolate KR) OX=73484 GN=gag-pol PE=3 SV=3	1	1	1	1	1	1	1	1	0	1	0	1	0	1	1	1	1	1	1	1	1	1	1	1	0	1	1	1	0	1	0	1	1	1	1	0	1	1	1	1	0	1
Q86U42	Q86U42	1	1	1	Polyadenylate-binding protein 2	PABPN1	sp|Q86U42|PABP2_HUMAN Polyadenylate-binding protein 2 OS=Homo sapiens OX=9606 GN=PABPN1 PE=1 SV=3	1	1	1	1	0	1	1	1	1	0	1	1	1	1	1	1	0	1	1	0	0	1	1	0	1	1	1	1	1	1	1	1	1	1	0	1	0	1	1	1	1	0
Q8IWI9	Q8IWI9	1	1	1	MAX gene-associated protein	MGA	sp|Q8IWI9|MGAP_HUMAN MAX gene-associated protein OS=Homo sapiens OX=9606 GN=MGA PE=1 SV=3	1	1	1	1	1	1	1	1	0	1	1	1	0	1	1	1	1	1	1	1	1	1	1	1	1	1	1	1	0	1	0	1	1	1	1	0	1	1	1	1	0	1
Q8NH49	Q8NH49	1	1	1	Olfactory receptor 4X1	OR4X1	sp|Q8NH49|OR4X1_HUMAN Olfactory receptor 4X1 OS=Homo sapiens OX=9606 GN=OR4X1 PE=3 SV=1	1	1	1	1	1	1	0	1	0	0	0	1	1	1	1	0	0	1	1	0	1	1	0	0	0	1	1	1	0	1	1	0	0	1	0	1	1	1	0	1	0	0
Q8NI35	Q8NI35	1	1	1	InaD-like protein	INADL	sp|Q8NI35|INADL_HUMAN InaD-like protein OS=Homo sapiens OX=9606 GN=PATJ PE=1 SV=3	1	1	1	1	0	0	0	0	0	0	0	0	0	1	0	1	0	1	1	#DIV/0!	0	0	0	0	0	1	1	0	0	0	0	1	0	0	0	0	0	0	0	0	0	0
Q8WTR2	Q8WTR2	1	1	1	Dual specificity protein phosphatase 19	DUSP19	sp|Q8WTR2|DUS19_HUMAN Dual specificity protein phosphatase 19 OS=Homo sapiens OX=9606 GN=DUSP19 PE=1 SV=1	1	1	1	1	0	0	0	0	1	0	0	0	1	1	0	0	0	0	1	#DIV/0!	0	0	0	0	0	1	0	0	1	0	1	0	0	0	0	0	0	0	0	0	1	0
Q8WTW3	Q8WTW3	1	1	1	Conserved oligomeric Golgi complex subunit 1	COG1	sp|Q8WTW3|COG1_HUMAN Conserved oligomeric Golgi complex subunit 1 OS=Homo sapiens OX=9606 GN=COG1 PE=1 SV=1	1	1	1	1	1	0	1	0	1	0	1	1	1	1	1	1	0	1	1	0	1	0	1	0	1	1	1	0	1	1	1	1	0	1	0	0	1	0	1	0	1	0
Q92535	Q92535	1	1	1	Phosphatidylinositol N-acetylglucosaminyltransferase subunit C	PIGC	sp|Q92535|PIGC_HUMAN Phosphatidylinositol N-acetylglucosaminyltransferase subunit C OS=Homo sapiens OX=9606 GN=PIGC PE=1 SV=1	1	1	1	1	0	0	0	0	0	0	0	0	0	1	0	0	0	0	1	#DIV/0!	0	0	0	0	0	1	0	0	0	0	0	0	0	0	0	0	0	0	0	0	0	0
Q96PQ0	Q96PQ0	1	1	1	VPS10 domain-containing receptor SorCS2	SORCS2	sp|Q96PQ0|SORC2_HUMAN VPS10 domain-containing receptor SorCS2 OS=Homo sapiens OX=9606 GN=SORCS2 PE=1 SV=3	1	1	1	1	1	1	1	1	1	1	1	1	1	1	1	1	1	1	1	1	1	1	1	1	1	1	1	1	1	1	1	1	1	1	1	0	1	1	1	1	1	1
Q98277	Q98277	1	1	1			sp|Q98277|ETF2_MCV1 Early transcription factor 82 kDa subunit OS=Molluscum contagiosum virus subtype 1 OX=10280 GN=VETFL PE=3 SV=1	1	1	1	1	1	1	0	1	1	0	0	1	0	1	0	1	0	0	1	#DIV/0!	1	1	0	0	0	1	0	1	1	1	0	1	0	0	0	1	1	1	0	1	1	0
Q9BRH9	Q9BRH9	1	1	1	Zinc finger protein 251	ZNF251	sp|Q9BRH9|ZN251_HUMAN Zinc finger protein 251 OS=Homo sapiens OX=9606 GN=ZNF251 PE=1 SV=4	1	1	1	1	1	1	1	0	0	1	1	1	1	1	1	1	1	1	1	1	1	1	1	1	1	1	1	0	0	1	1	1	1	1	1	1	1	1	1	0	0	1
Q9H2F9	Q9H2F9	1	1	1	Coiled-coil domain-containing protein 68	CCDC68	sp|Q9H2F9|CCD68_HUMAN Coiled-coil domain-containing protein 68 OS=Homo sapiens OX=9606 GN=CCDC68 PE=1 SV=1	1	1	1	1	0	0	0	1	1	0	1	1	0	1	0	0	1	1	1	#DIV/0!	0	0	0	0	1	1	1	1	1	1	0	0	0	0	1	1	0	0	0	1	1	0
Q9HBL0	Q9HBL0	1	1	1	Tensin-1	TNS1	sp|Q9HBL0|TENS1_HUMAN Tensin-1 OS=Homo sapiens OX=9606 GN=TNS1 PE=1 SV=2	1	1	1	1	0	1	0	1	0	0	0	1	0	1	0	1	0	1	1	#DIV/0!	0	1	0	0	0	1	1	1	0	1	0	1	1	0	0	0	0	1	0	1	0	0
Q9HC77	Q9HC77	1	1	1	Centromere protein J	CENPJ	sp|Q9HC77|CENPJ_HUMAN Centromere protein J OS=Homo sapiens OX=9606 GN=CENPJ PE=1 SV=2	1	1	1	1	1	1	0	1	1	1	1	1	1	1	1	1	0	1	1	0	1	1	0	1	1	1	1	1	1	1	1	1	1	1	0	1	1	1	0	1	1	1
Q9HCL3	Q9HCL3	1	1	1	Zinc finger protein 14 homolog	ZFP14	sp|Q9HCL3|ZFP14_HUMAN Zinc finger protein 14 homolog OS=Homo sapiens OX=9606 GN=ZFP14 PE=2 SV=2	1	1	1	1	0	0	0	1	0	0	0	1	0	1	0	1	0	1	1	#DIV/0!	0	0	0	0	0	1	1	1	0	1	0	1	0	0	0	0	0	0	0	1	0	0
Q9P0W8	Q9P0W8	1	1	1	Spermatogenesis-associated protein 7	SPATA7	sp|Q9P0W8|SPAT7_HUMAN Spermatogenesis-associated protein 7 OS=Homo sapiens OX=9606 GN=SPATA7 PE=1 SV=3	1	1	1	1	1	0	0	1	1	0	1	0	0	1	0	1	0	0	1	#DIV/0!	1	0	0	0	1	1	0	1	1	0	0	1	0	0	0	1	1	0	0	1	1	0
Q9UGL1	Q9UGL1	1	1	1	Lysine-specific demethylase 5B	KDM5B	sp|Q9UGL1|KDM5B_HUMAN Lysine-specific demethylase 5B OS=Homo sapiens OX=9606 GN=KDM5B PE=1 SV=3	1	1	1	1	0	0	0	0	0	0	0	0	0	1	0	0	0	0	1	#DIV/0!	0	0	0	0	0	1	0	0	0	0	0	0	0	0	0	0	0	0	0	0	0	0
Q9UMR3	Q9UMR3	1	1	1	T-box transcription factor TBX20	TBX20	sp|Q9UMR3|TBX20_HUMAN T-box transcription factor TBX20 OS=Homo sapiens OX=9606 GN=TBX20 PE=1 SV=4	1	1	1	1	0	0	0	0	1	0	0	0	0	1	0	0	0	0	1	#DIV/0!	0	0	0	0	0	1	0	0	1	0	0	0	0	0	0	0	0	0	0	0	1	0
Q9Y3U8	Q9Y3U8	1	1	1	60S ribosomal protein L36	RPL36	sp|Q9Y3U8|RL36_HUMAN 60S ribosomal protein L36 OS=Homo sapiens OX=9606 GN=RPL36 PE=1 SV=3	1	1	1	1	0	0	0	0	0	0	0	0	0	1	0	0	0	0	1	#DIV/0!	0	0	0	0	0	1	0	0	0	0	0	0	0	0	0	0	0	0	0	0	0	0
Q9Y6J9	Q9Y6J9	1	1	1	TAF6-like RNA polymerase II p300/CBP-associated factor-associated factor 65 kDa subunit 6L	TAF6L	sp|Q9Y6J9|TAF6L_HUMAN TAF6-like RNA polymerase II p300/CBP-associated factor-associated factor 65 kDa subunit 6L OS=Homo sapiens OX=9606 GN=TAF6L PE=1 SV=1	1	1	1	1	0	1	1	0	1	0	0	1	0	1	0	0	0	0	1	#DIV/0!	0	1	1	0	0	1	0	0	1	1	0	0	0	0	0	0	0	1	1	0	1	0
Q6LEJ4	Q6LEJ4	1	1	1			sp|Q6LEJ4|HEMA_I80A2 Hemagglutinin OS=Influenza A virus (strain A/Seal/Massachusetts/1/1980 H7N7) OX=384493 GN=HA PE=3 SV=1	1	1	1	1	0	1	0	0	0	0	0	1	0	0	0	0	0	1	1	#DIV/0!	0	1	0	0	0	0	1	0	0	1	0	0	1	0	0	0	0	1	0	0	0	0
Q9P0L2	Q9P0L2	1	1	1	Serine/threonine-protein kinase MARK1	MARK1	sp|Q9P0L2|MARK1_HUMAN Serine/threonine-protein kinase MARK1 OS=Homo sapiens OX=9606 GN=MARK1 PE=1 SV=2	1	1	1	1	0	1	1	0	0	1	0	1	0	0	0	0	0	1	1	#DIV/0!	0	1	1	1	0	0	1	0	0	1	0	0	1	0	0	0	0	1	1	0	0	1
P01008	P01008	1	1	1	Antithrombin-III	SERPINC1	sp|P01008|ANT3_HUMAN Antithrombin-III OS=Homo sapiens OX=9606 GN=SERPINC1 PE=1 SV=1	1	1	1	1	0	1	0	0	0	0	0	0	0	0	0	0	0	0	1	#DIV/0!	0	1	0	0	0	0	0	0	0	0	0	0	0	0	0	0	0	1	0	0	0	0
P06454	P06454	1	1	1	Prothymosin alpha	PTMA	sp|P06454|PTMA_HUMAN Prothymosin alpha OS=Homo sapiens OX=9606 GN=PTMA PE=1 SV=2	1	1	1	1	1	1	0	0	1	0	0	0	1	0	1	0	0	1	1	0	1	1	0	0	0	0	1	0	1	0	1	0	1	1	0	0	1	1	0	0	1	0
P47914	P47914	1	1	1	60S ribosomal protein L29	RPL29	sp|P47914|RL29_HUMAN 60S ribosomal protein L29 OS=Homo sapiens OX=9606 GN=RPL29 PE=1 SV=2	1	1	1	1	0	1	1	0	1	1	0	0	1	0	1	0	1	0	1	1	0	1	1	1	0	0	0	0	1	0	1	0	1	1	1	1	0	1	1	0	1	1
B2RTY4	B2RTY4	1	1	1	Unconventional myosin-IXa	MYO9A	sp|B2RTY4|MYO9A_HUMAN Unconventional myosin-IXa OS=Homo sapiens OX=9606 GN=MYO9A PE=1 SV=2	1	1	1	1	0	0	0	0	0	0	0	0	1	0	0	0	0	0	1	#DIV/0!	0	0	0	0	0	0	0	0	0	0	1	0	0	0	0	0	0	0	0	0	0	0
P16735;F5HBR4	P16735;F5HBR4	1;1	1;1	1;1			sp|P16735|PORTL_HCMVA Portal protein OS=Human cytomegalovirus (strain AD169) OX=10360 GN=UL104 PE=3 SV=2;sp|F5HBR4|PORTL_HCMVM Portal protein OS=Human cytomegalovirus (strain Merlin) OX=295027 GN=UL104 PE=3 SV=1	2	1	1	1	0	0	0	0	0	0	1	0	0	0	0	0	0	0	1	#DIV/0!	0	0	0	0	1	0	0	0	0	0	0	0	0	0	0	0	0	0	0	0	0	0
O00231	O00231	1	1	1	26S proteasome non-ATPase regulatory subunit 11	PSMD11	sp|O00231|PSD11_HUMAN 26S proteasome non-ATPase regulatory subunit 11 OS=Homo sapiens OX=9606 GN=PSMD11 PE=1 SV=3	1	1	1	1	0	0	0	0	1	1	0	0	0	0	0	0	0	0	1	#DIV/0!	0	0	0	1	0	0	0	0	1	0	0	0	0	0	0	0	0	0	0	0	1	1
O00303	O00303	1	1	1	Eukaryotic translation initiation factor 3 subunit F	EIF3F	sp|O00303|EIF3F_HUMAN Eukaryotic translation initiation factor 3 subunit F OS=Homo sapiens OX=9606 GN=EIF3F PE=1 SV=1	1	1	1	1	0	0	0	0	1	0	0	0	0	0	0	0	0	0	1	#DIV/0!	0	0	0	0	0	0	0	0	1	0	0	0	0	0	0	0	0	0	0	0	1	0
O00418	O00418	1	1	1	Eukaryotic elongation factor 2 kinase	EEF2K	sp|O00418|EF2K_HUMAN Eukaryotic elongation factor 2 kinase OS=Homo sapiens OX=9606 GN=EEF2K PE=1 SV=2	1	1	1	1	0	0	0	0	0	0	0	0	0	0	0	1	0	0	1	#DIV/0!	0	0	0	0	0	0	0	0	0	0	0	1	0	0	0	0	0	0	0	0	0	0
O09705	O09705	1	1	1			sp|O09705|L_LASSJ RNA-directed RNA polymerase L OS=Lassa virus (strain Mouse/Sierra Leone/Josiah/1976) OX=11622 GN=L PE=3 SV=1	1	1	1	1	1	0	0	0	0	0	1	0	0	0	1	1	0	1	1	0	1	0	0	0	1	0	1	0	0	0	0	1	0	1	0	0	1	0	0	0	0	0
O14818	O14818	1	1	1	Proteasome subunit alpha type-7	PSMA7	sp|O14818|PSA7_HUMAN Proteasome subunit alpha type-7 OS=Homo sapiens OX=9606 GN=PSMA7 PE=1 SV=1	1	1	1	1	0	0	0	0	1	0	0	0	0	0	0	0	0	0	1	#DIV/0!	0	0	0	0	0	0	0	0	1	0	0	0	0	0	0	0	0	0	0	0	1	0
O15018	O15018	1	1	1	PDZ domain-containing protein 2	PDZD2	sp|O15018|PDZD2_HUMAN PDZ domain-containing protein 2 OS=Homo sapiens OX=9606 GN=PDZD2 PE=1 SV=4	1	1	1	1	0	0	1	0	1	0	0	0	0	0	0	0	0	0	1	#DIV/0!	0	0	1	0	0	0	0	0	1	0	0	0	0	0	0	0	0	0	1	0	1	0
O15090	O15090	1	1	1	Zinc finger protein 536	ZNF536	sp|O15090|ZN536_HUMAN Zinc finger protein 536 OS=Homo sapiens OX=9606 GN=ZNF536 PE=1 SV=3	1	1	1	1	0	0	0	0	0	0	0	0	1	0	0	0	0	0	1	#DIV/0!	0	0	0	0	0	0	0	0	0	0	1	0	0	0	0	0	0	0	0	0	0	0
O15230	O15230	1	1	1	Laminin subunit alpha-5	LAMA5	sp|O15230|LAMA5_HUMAN Laminin subunit alpha-5 OS=Homo sapiens OX=9606 GN=LAMA5 PE=1 SV=8	1	1	1	1	0	0	0	0	0	0	1	0	0	0	0	0	0	0	1	#DIV/0!	0	0	0	0	1	0	0	0	0	0	0	0	0	0	0	0	0	0	0	0	0	0
O15530	O15530	1	1	1	3-phosphoinositide-dependent protein kinase 1	PDPK1	sp|O15530|PDPK1_HUMAN 3-phosphoinositide-dependent protein kinase 1 OS=Homo sapiens OX=9606 GN=PDPK1 PE=1 SV=1	1	1	1	1	0	0	0	1	0	0	1	0	0	0	0	0	0	0	1	#DIV/0!	0	0	0	0	1	0	0	1	0	0	0	0	0	0	0	0	0	0	0	1	0	0
P39687;O43423	P39687;O43423	1;1	1;1	1;1	Acidic leucine-rich nuclear phosphoprotein 32 family member A	ANP32A	sp|P39687|AN32A_HUMAN Acidic leucine-rich nuclear phosphoprotein 32 family member A OS=Homo sapiens OX=9606 GN=ANP32A PE=1 SV=1;sp|O43423|AN32C_HUMAN Acidic leucine-rich nuclear phosphoprotein 32 family member C OS=Homo sapiens OX=9606 GN=ANP32C PE=2 SV=1	2	1	1	1	0	0	0	0	1	0	0	0	0	0	0	0	0	0	1	#DIV/0!	0	0	0	0	0	0	0	0	1	0	0	0	0	0	0	0	0	0	0	0	1	0
O43670	O43670	1	1	1	BUB3-interacting and GLEBS motif-containing protein ZNF207	ZNF207	sp|O43670|ZN207_HUMAN BUB3-interacting and GLEBS motif-containing protein ZNF207 OS=Homo sapiens OX=9606 GN=ZNF207 PE=1 SV=1	1	1	1	1	0	0	0	0	1	0	0	0	0	0	0	0	0	0	1	#DIV/0!	0	0	0	0	0	0	0	0	1	0	0	0	0	0	0	0	0	0	0	0	1	0
O43684	O43684	1	1	1	Mitotic checkpoint protein BUB3	BUB3	sp|O43684|BUB3_HUMAN Mitotic checkpoint protein BUB3 OS=Homo sapiens OX=9606 GN=BUB3 PE=1 SV=1	1	1	1	1	0	0	0	0	1	0	0	0	0	0	0	0	0	0	1	#DIV/0!	0	0	0	0	0	0	0	0	1	0	0	0	0	0	0	0	0	0	0	0	1	0
O43868	O43868	1	1	1	Sodium/nucleoside cotransporter 2	SLC28A2	sp|O43868|S28A2_HUMAN Sodium/nucleoside cotransporter 2 OS=Homo sapiens OX=9606 GN=SLC28A2 PE=2 SV=2	1	1	1	1	0	0	0	0	0	0	0	0	0	0	0	0	0	0	1	#DIV/0!	0	0	0	0	0	0	0	0	0	0	0	0	0	0	0	1	0	0	0	0	0	0
P22392;O60361	P22392;O60361	3;3	1;1	1;1	Nucleoside diphosphate kinase B	NME2	sp|P22392|NDKB_HUMAN Nucleoside diphosphate kinase B OS=Homo sapiens OX=9606 GN=NME2 PE=1 SV=1;sp|O60361|NDK8_HUMAN Putative nucleoside diphosphate kinase OS=Homo sapiens OX=9606 GN=NME2P1 PE=5 SV=1	2	3	1	1	0	0	0	0	3	0	1	0	0	0	0	1	0	0	1	#DIV/0!	0	0	0	0	0	0	0	0	1	0	0	0	0	0	0	0	0	0	0	0	1	0
O60566	O60566	1	1	1	Mitotic checkpoint serine/threonine-protein kinase BUB1 beta	BUB1B	sp|O60566|BUB1B_HUMAN Mitotic checkpoint serine/threonine-protein kinase BUB1 beta OS=Homo sapiens OX=9606 GN=BUB1B PE=1 SV=3	1	1	1	1	0	0	0	0	1	0	0	0	0	0	0	0	0	0	1	#DIV/0!	0	0	0	0	0	0	0	0	1	0	0	0	0	0	0	0	0	0	0	0	1	0
O60664	O60664	1	1	1	Perilipin-3	PLIN3	sp|O60664|PLIN3_HUMAN Perilipin-3 OS=Homo sapiens OX=9606 GN=PLIN3 PE=1 SV=3	1	1	1	1	0	0	0	0	1	0	0	0	0	0	0	0	0	0	1	#DIV/0!	0	0	0	0	0	0	0	0	1	0	0	0	0	0	0	0	0	0	0	0	1	0
O60841	O60841	1	1	1	Eukaryotic translation initiation factor 5B	EIF5B	sp|O60841|IF2P_HUMAN Eukaryotic translation initiation factor 5B OS=Homo sapiens OX=9606 GN=EIF5B PE=1 SV=4	1	1	1	1	0	0	0	0	1	0	0	0	0	0	0	0	0	0	1	#DIV/0!	0	0	0	0	0	0	0	0	1	0	0	0	0	0	0	0	0	0	0	0	1	0
O75376;REV__P31944	O75376;REV__P31944	1;1	1;1	1;1	Nuclear receptor corepressor 1	NCOR1	sp|O75376|NCOR1_HUMAN Nuclear receptor corepressor 1 OS=Homo sapiens OX=9606 GN=NCOR1 PE=1 SV=2;sp|P31944|CASPE_HUMAN Caspase-14 OS=Homo sapiens OX=9606 GN=CASP14 PE=1 SV=2	2	1	1	1	0	0	0	0	0	0	0	0	1	0	0	0	0	1	1	#DIV/0!	0	0	0	0	0	0	1	0	0	0	1	0	0	0	0	0	0	0	0	0	0	0
O75534	O75534	1	1	1	Cold shock domain-containing protein E1	CSDE1	sp|O75534|CSDE1_HUMAN Cold shock domain-containing protein E1 OS=Homo sapiens OX=9606 GN=CSDE1 PE=1 SV=2	1	1	1	1	0	0	0	0	1	0	0	0	0	0	0	0	0	0	1	#DIV/0!	0	0	0	0	0	0	0	0	1	0	0	0	0	0	0	0	0	0	0	0	1	0
O75822	O75822	1	1	1	Eukaryotic translation initiation factor 3 subunit J	EIF3J	sp|O75822|EIF3J_HUMAN Eukaryotic translation initiation factor 3 subunit J OS=Homo sapiens OX=9606 GN=EIF3J PE=1 SV=2	1	1	1	1	0	0	0	0	0	1	0	0	0	0	0	0	0	0	1	#DIV/0!	0	0	0	1	0	0	0	0	0	0	0	0	0	0	0	0	0	0	0	0	0	1
O75874	O75874	1	1	1	Isocitrate dehydrogenase [NADP] cytoplasmic	IDH1	sp|O75874|IDHC_HUMAN Isocitrate dehydrogenase [NADP] cytoplasmic OS=Homo sapiens OX=9606 GN=IDH1 PE=1 SV=2	1	1	1	1	0	0	0	0	1	0	0	0	0	0	0	0	0	0	1	#DIV/0!	0	0	0	0	0	0	0	0	1	0	0	0	0	0	0	0	0	0	0	0	1	0
O75916	O75916	1	1	1	Regulator of G-protein signaling 9	RGS9	sp|O75916|RGS9_HUMAN Regulator of G-protein signaling 9 OS=Homo sapiens OX=9606 GN=RGS9 PE=1 SV=1	1	1	1	1	0	0	0	0	0	0	0	0	1	0	0	0	0	0	1	#DIV/0!	0	0	0	0	0	0	0	0	0	0	1	0	0	0	0	0	0	0	0	0	0	0
O75937	O75937	1	1	1	DnaJ homolog subfamily C member 8	DNAJC8	sp|O75937|DNJC8_HUMAN DnaJ homolog subfamily C member 8 OS=Homo sapiens OX=9606 GN=DNAJC8 PE=1 SV=2	1	1	1	1	0	0	0	0	1	0	0	0	0	0	0	0	0	0	1	#DIV/0!	0	0	0	0	0	0	0	0	1	0	0	0	0	0	0	0	0	0	0	0	1	0
O75962	O75962	1	1	1	Triple functional domain protein	TRIO	sp|O75962|TRIO_HUMAN Triple functional domain protein OS=Homo sapiens OX=9606 GN=TRIO PE=1 SV=2	1	1	1	1	0	0	0	0	0	0	1	0	0	0	0	0	0	0	1	#DIV/0!	0	0	0	0	1	0	0	0	0	0	0	0	0	0	0	0	0	0	0	0	0	0
O94812	O94812	1	1	1	BAI1-associated protein 3	BAIAP3	sp|O94812|BAIP3_HUMAN BAI1-associated protein 3 OS=Homo sapiens OX=9606 GN=BAIAP3 PE=1 SV=2	1	1	1	1	0	0	0	0	0	0	0	0	0	0	0	1	0	0	1	#DIV/0!	0	0	0	0	0	0	0	0	0	0	0	1	0	0	0	0	0	0	0	0	0	0
O95600	O95600	1	1	1	Krueppel-like factor 8	KLF8	sp|O95600|KLF8_HUMAN Krueppel-like factor 8 OS=Homo sapiens OX=9606 GN=KLF8 PE=1 SV=2	1	1	1	1	0	0	0	0	0	0	0	0	1	0	0	0	1	0	1	#DIV/0!	0	0	0	0	0	0	0	0	0	0	1	0	1	0	1	0	0	0	0	0	0	0
O95747	O95747	1	1	1	Serine/threonine-protein kinase OSR1	OXSR1	sp|O95747|OXSR1_HUMAN Serine/threonine-protein kinase OSR1 OS=Homo sapiens OX=9606 GN=OXSR1 PE=1 SV=1	1	1	1	1	0	0	0	0	1	0	0	0	0	0	0	0	0	0	1	#DIV/0!	0	0	0	0	0	0	0	0	1	0	0	0	0	0	0	0	0	0	0	0	1	0
O95816	O95816	1	1	1	BAG family molecular chaperone regulator 2	BAG2	sp|O95816|BAG2_HUMAN BAG family molecular chaperone regulator 2 OS=Homo sapiens OX=9606 GN=BAG2 PE=1 SV=1	1	1	1	1	0	0	0	0	0	0	0	0	0	0	0	1	0	0	1	#DIV/0!	0	0	0	0	0	0	0	0	0	0	0	1	0	0	0	0	0	0	0	0	0	0
P00367;P49448	P00367;P49448	1;1	1;1	1;1	Glutamate dehydrogenase 1, mitochondrial	GLUD1	sp|P00367|DHE3_HUMAN Glutamate dehydrogenase 1, mitochondrial OS=Homo sapiens OX=9606 GN=GLUD1 PE=1 SV=2;sp|P49448|DHE4_HUMAN Glutamate dehydrogenase 2, mitochondrial OS=Homo sapiens OX=9606 GN=GLUD2 PE=1 SV=2	2	1	1	1	0	0	0	0	1	0	0	0	0	0	0	0	0	0	1	#DIV/0!	0	0	0	0	0	0	0	0	1	0	0	0	1	0	0	0	0	0	0	0	1	0
P00390	P00390	1	1	1	Glutathione reductase, mitochondrial	GSR	sp|P00390|GSHR_HUMAN Glutathione reductase, mitochondrial OS=Homo sapiens OX=9606 GN=GSR PE=1 SV=2	1	1	1	1	0	0	0	0	1	0	0	0	0	0	0	0	0	0	1	#DIV/0!	0	0	0	0	0	0	0	0	1	0	0	0	0	0	0	0	0	0	0	0	1	0
P00441	P00441	1	1	1	Superoxide dismutase [Cu-Zn]	SOD1	sp|P00441|SODC_HUMAN Superoxide dismutase [Cu-Zn] OS=Homo sapiens OX=9606 GN=SOD1 PE=1 SV=2	1	1	1	1	0	0	0	0	1	0	0	0	0	0	0	0	0	0	1	#DIV/0!	0	0	0	0	0	0	0	0	1	0	0	0	0	0	0	1	0	0	0	0	1	0
P01040	P01040	1	1	1	Cystatin-A	CSTA	sp|P01040|CYTA_HUMAN Cystatin-A OS=Homo sapiens OX=9606 GN=CSTA PE=1 SV=1	1	1	1	1	0	0	0	0	0	0	0	0	0	0	0	0	0	0	1	#DIV/0!	0	0	0	0	0	0	0	0	0	0	0	0	0	0	0	1	0	0	0	0	0	0
P02786	P02786	1	1	1	Transferrin receptor protein 1	TFRC	sp|P02786|TFR1_HUMAN Transferrin receptor protein 1 OS=Homo sapiens OX=9606 GN=TFRC PE=1 SV=2	1	1	1	1	0	0	0	0	1	0	0	0	0	0	0	0	0	0	1	#DIV/0!	0	0	0	0	0	0	0	0	1	0	0	0	0	0	0	0	0	0	0	0	1	0
P04843	P04843	1	1	1	Dolichyl-diphosphooligosaccharide--protein glycosyltransferase subunit 1	RPN1	sp|P04843|RPN1_HUMAN Dolichyl-diphosphooligosaccharide--protein glycosyltransferase subunit 1 OS=Homo sapiens OX=9606 GN=RPN1 PE=1 SV=1	1	1	1	1	0	0	0	0	1	0	0	0	0	0	0	0	0	0	1	#DIV/0!	0	0	0	0	0	0	0	0	1	0	0	0	0	0	0	0	0	0	0	0	1	0
P04882	P04882	1	1	1			sp|P04882|GLYCO_VSNJO Glycoprotein OS=Vesicular stomatitis New Jersey virus (strain Ogden subtype Concan) OX=11283 GN=G PE=1 SV=1	1	1	1	1	0	0	0	0	1	0	0	0	0	0	0	0	0	0	1	#DIV/0!	0	0	0	0	0	0	0	0	1	0	0	0	0	0	0	1	0	0	0	0	1	0
P05663	P05663	1	1	1			sp|P05663|PKG3_ADE07 Packaging protein 3 (Fragment) OS=Human adenovirus B serotype 7 OX=10519 GN=L1 PE=2 SV=1	1	1	1	1	0	0	1	0	0	0	0	0	0	0	1	1	0	0	1	0	0	0	1	0	0	0	0	0	0	0	0	1	0	1	0	0	0	0	1	0	0	0
P05877	P05877	1	1	1			sp|P05877|ENV_HV1MN Envelope glycoprotein gp160 OS=Human immunodeficiency virus type 1 group M subtype B (isolate MN) OX=11696 GN=env PE=1 SV=1	1	1	1	1	0	0	0	0	0	0	0	0	0	0	0	1	0	0	1	#DIV/0!	0	0	0	0	0	0	0	0	0	0	0	1	1	0	0	0	0	0	0	0	0	0
P06416;P17388;P26535;P50825	P06416;P17388;P26535;P50825	1;1;1;1	1;1;1;1	1;1;1;1			sp|P06416|VL1_HPV33 Major capsid protein L1 OS=Human papillomavirus type 33 OX=10586 GN=L1 PE=3 SV=1;sp|P17388|VL1_HPV31 Major capsid protein L1 OS=Human papillomavirus type 31 OX=10585 GN=L1 PE=3 SV=1;sp|P26535|VL1_HPV58 Major capsid protein L1 OS=Human p	4	1	1	1	1	0	0	0	0	1	0	0	0	0	0	1	0	0	1	#DIV/0!	1	0	0	1	0	0	0	0	0	0	0	1	0	0	0	0	1	0	0	0	0	1
P06746	P06746	1	1	1	DNA polymerase beta	POLB	sp|P06746|DPOLB_HUMAN DNA polymerase beta OS=Homo sapiens OX=9606 GN=POLB PE=1 SV=3	1	1	1	1	0	0	0	0	0	0	0	0	1	0	0	0	0	0	1	#DIV/0!	0	0	0	0	0	0	0	0	0	0	1	0	0	0	0	0	0	0	0	0	0	0
P07196	P07196	1	1	1	Neurofilament light polypeptide	NEFL	sp|P07196|NFL_HUMAN Neurofilament light polypeptide OS=Homo sapiens OX=9606 GN=NEFL PE=1 SV=3	1	1	1	1	0	0	0	0	0	0	0	1	0	0	0	0	0	0	1	#DIV/0!	0	0	0	0	0	0	0	0	0	1	0	0	0	0	0	0	0	0	0	0	0	0
P08758	P08758	1	1	1	Annexin A5	ANXA5	sp|P08758|ANXA5_HUMAN Annexin A5 OS=Homo sapiens OX=9606 GN=ANXA5 PE=1 SV=2	1	1	1	1	0	0	0	0	1	0	0	0	0	0	0	0	0	0	1	#DIV/0!	0	0	0	0	0	0	0	0	1	0	0	0	0	0	0	0	0	0	0	0	1	0
P09496	P09496	1	1	1	Clathrin light chain A	CLTA	sp|P09496|CLCA_HUMAN Clathrin light chain A OS=Homo sapiens OX=9606 GN=CLTA PE=1 SV=1	1	1	1	1	0	0	0	0	1	0	0	0	0	0	0	0	0	0	1	#DIV/0!	0	0	0	0	0	0	0	0	1	0	0	0	0	0	0	0	0	0	0	0	1	0
P09525	P09525	1	1	1	Annexin A4	ANXA4	sp|P09525|ANXA4_HUMAN Annexin A4 OS=Homo sapiens OX=9606 GN=ANXA4 PE=1 SV=4	1	1	1	1	0	0	0	0	1	0	0	0	0	0	0	0	0	0	1	#DIV/0!	0	0	0	0	0	0	0	0	1	0	0	0	0	0	0	0	0	0	0	0	1	0
P09661	P09661	1	1	1	U2 small nuclear ribonucleoprotein A	SNRPA1	sp|P09661|RU2A_HUMAN U2 small nuclear ribonucleoprotein A OS=Homo sapiens OX=9606 GN=SNRPA1 PE=1 SV=2	1	1	1	1	0	0	0	0	0	0	0	0	0	0	0	1	0	0	1	#DIV/0!	0	0	0	0	0	0	0	0	0	0	0	1	0	0	0	0	0	0	0	0	0	0
P09874	P09874	1	1	1	Poly [ADP-ribose] polymerase 1	PARP1	sp|P09874|PARP1_HUMAN Poly [ADP-ribose] polymerase 1 OS=Homo sapiens OX=9606 GN=PARP1 PE=1 SV=4	1	1	1	1	0	0	0	0	1	0	0	0	0	0	0	0	0	0	1	#DIV/0!	0	0	0	0	0	0	0	0	1	0	0	0	0	0	0	0	0	0	0	0	1	0
P10909	P10909	1	1	1	Clusterin	CLU	sp|P10909|CLUS_HUMAN Clusterin OS=Homo sapiens OX=9606 GN=CLU PE=1 SV=1	1	1	1	1	0	0	0	0	1	0	0	0	0	0	0	0	0	0	1	#DIV/0!	0	0	0	0	0	0	0	0	1	0	0	0	0	0	0	0	0	0	0	0	1	0
P11509	P11509	1	1	1	Cytochrome P450 2A6	CYP2A6	sp|P11509|CP2A6_HUMAN Cytochrome P450 2A6 OS=Homo sapiens OX=9606 GN=CYP2A6 PE=1 SV=3	1	1	1	1	0	0	0	0	0	0	0	0	0	0	0	0	0	1	1	#DIV/0!	0	0	0	0	0	0	1	0	0	0	0	0	0	0	0	1	0	0	0	0	0	0
P11940;Q9H361	P11940;Q9H361	1;1	1;1	1;1	Polyadenylate-binding protein 1	PABPC1	sp|P11940|PABP1_HUMAN Polyadenylate-binding protein 1 OS=Homo sapiens OX=9606 GN=PABPC1 PE=1 SV=2;sp|Q9H361|PABP3_HUMAN Polyadenylate-binding protein 3 OS=Homo sapiens OX=9606 GN=PABPC3 PE=1 SV=2	2	1	1	1	0	0	0	0	0	0	0	0	1	0	1	0	0	0	1	0	0	0	0	0	0	0	0	0	0	0	1	0	1	1	0	0	0	0	0	0	0	0
P12004	P12004	1	1	1	Proliferating cell nuclear antigen	PCNA	sp|P12004|PCNA_HUMAN Proliferating cell nuclear antigen OS=Homo sapiens OX=9606 GN=PCNA PE=1 SV=1	1	1	1	1	0	0	0	0	1	0	0	0	0	0	0	0	0	0	1	#DIV/0!	0	0	0	0	0	0	0	0	1	0	0	0	0	0	0	0	0	0	0	0	1	0
P12236	P12236	3	1	1	ADP/ATP translocase 3	SLC25A6	sp|P12236|ADT3_HUMAN ADP/ATP translocase 3 OS=Homo sapiens OX=9606 GN=SLC25A6 PE=1 SV=4	1	3	1	1	0	0	0	0	2	0	1	0	0	0	0	1	0	1	1	#DIV/0!	0	0	0	0	0	0	1	0	0	0	0	0	0	0	0	0	0	0	0	0	0	0
P12429	P12429	1	1	1	Annexin A3	ANXA3	sp|P12429|ANXA3_HUMAN Annexin A3 OS=Homo sapiens OX=9606 GN=ANXA3 PE=1 SV=3	1	1	1	1	0	0	0	0	1	0	0	0	0	0	0	0	0	0	1	#DIV/0!	0	0	0	0	0	0	0	0	1	0	0	0	0	0	0	0	0	0	0	0	1	0
P13693;Q56UQ5	P13693;Q56UQ5	1;1	1;1	1;1	Translationally-controlled tumor protein	TPT1	sp|P13693|TCTP_HUMAN Translationally-controlled tumor protein OS=Homo sapiens OX=9606 GN=TPT1 PE=1 SV=1;sp|Q56UQ5|TPT1L_HUMAN TPT1-like protein OS=Homo sapiens OX=9606 PE=2 SV=2	2	1	1	1	0	0	0	0	1	0	1	0	0	0	0	0	0	0	1	#DIV/0!	0	0	0	0	1	0	0	0	1	0	0	0	0	0	0	0	0	0	0	0	1	0
P14174	P14174	1	1	1	Macrophage migration inhibitory factor	MIF	sp|P14174|MIF_HUMAN Macrophage migration inhibitory factor OS=Homo sapiens OX=9606 GN=MIF PE=1 SV=4	1	1	1	1	0	0	0	0	1	0	1	0	0	0	0	0	0	0	1	#DIV/0!	0	0	0	0	1	0	0	0	1	0	0	0	0	0	0	0	0	0	0	0	1	0
P15531	P15531	3	3	1	Nucleoside diphosphate kinase A	NME1	sp|P15531|NDKA_HUMAN Nucleoside diphosphate kinase A OS=Homo sapiens OX=9606 GN=NME1 PE=1 SV=1	1	3	3	1	0	0	0	0	3	0	1	0	0	0	0	1	0	0	1	#DIV/0!	0	0	0	0	1	0	0	0	3	0	0	1	0	0	0	0	0	0	0	0	1	0
P15559	P15559	1	1	1	NAD(P)H dehydrogenase [quinone] 1	NQO1	sp|P15559|NQO1_HUMAN NAD(P)H dehydrogenase [quinone] 1 OS=Homo sapiens OX=9606 GN=NQO1 PE=1 SV=1	1	1	1	1	0	0	0	0	1	0	0	0	0	0	0	0	0	0	1	#DIV/0!	0	0	0	0	0	0	0	0	1	0	0	0	0	0	0	0	0	0	0	0	1	0
P15880	P15880	1	1	1	40S ribosomal protein S2	RPS2	sp|P15880|RS2_HUMAN 40S ribosomal protein S2 OS=Homo sapiens OX=9606 GN=RPS2 PE=1 SV=2	1	1	1	1	0	0	0	0	1	0	0	0	0	0	0	0	0	0	1	#DIV/0!	0	0	0	0	0	0	0	0	1	0	0	0	0	0	0	0	0	0	0	0	1	0
P16422	P16422	1	1	1	Epithelial cell adhesion molecule	EPCAM	sp|P16422|EPCAM_HUMAN Epithelial cell adhesion molecule OS=Homo sapiens OX=9606 GN=EPCAM PE=1 SV=2	1	1	1	1	0	0	0	0	1	0	0	0	0	0	0	0	0	0	1	#DIV/0!	0	0	0	0	0	0	0	0	1	0	0	0	0	0	0	0	0	0	0	0	1	0
P16949;Q93045	P16949;Q93045	1;1	1;1	1;1	Stathmin	STMN1	sp|P16949|STMN1_HUMAN Stathmin OS=Homo sapiens OX=9606 GN=STMN1 PE=1 SV=3;sp|Q93045|STMN2_HUMAN Stathmin-2 OS=Homo sapiens OX=9606 GN=STMN2 PE=1 SV=3	2	1	1	1	0	0	0	0	1	0	0	0	0	0	0	0	0	0	1	#DIV/0!	0	0	0	0	0	0	0	0	1	0	0	0	0	0	0	0	0	0	0	0	1	0
P17174	P17174	1	1	1	Aspartate aminotransferase, cytoplasmic	GOT1	sp|P17174|AATC_HUMAN Aspartate aminotransferase, cytoplasmic OS=Homo sapiens OX=9606 GN=GOT1 PE=1 SV=3	1	1	1	1	0	0	0	0	1	0	0	0	0	0	0	0	0	0	1	#DIV/0!	0	0	0	0	0	0	0	0	1	0	0	0	0	0	0	0	0	0	0	0	1	0
P17931	P17931	1	1	1	Galectin-3	LGALS3	sp|P17931|LEG3_HUMAN Galectin-3 OS=Homo sapiens OX=9606 GN=LGALS3 PE=1 SV=5	1	1	1	1	0	0	0	0	1	0	0	0	0	0	0	0	0	0	1	#DIV/0!	0	0	0	0	0	0	0	0	1	0	0	0	0	0	0	0	0	0	0	0	1	0
P21854	P21854	1	1	1	B-cell differentiation antigen CD72	CD72	sp|P21854|CD72_HUMAN B-cell differentiation antigen CD72 OS=Homo sapiens OX=9606 GN=CD72 PE=2 SV=1	1	1	1	1	0	1	0	0	1	0	0	1	0	0	1	0	0	1	1	0	0	1	0	0	0	0	1	0	1	1	0	0	1	1	0	0	0	1	0	0	1	0
P22102	P22102	1	1	1	Trifunctional purine biosynthetic protein adenosine-3	GART	sp|P22102|PUR2_HUMAN Trifunctional purine biosynthetic protein adenosine-3 OS=Homo sapiens OX=9606 GN=GART PE=1 SV=1	1	1	1	1	0	0	0	0	1	0	0	0	0	0	0	0	0	0	1	#DIV/0!	0	0	0	0	0	0	0	0	1	0	0	0	0	0	0	0	0	0	0	0	1	0
P23284	P23284	1	1	1	Peptidyl-prolyl cis-trans isomerase B	PPIB	sp|P23284|PPIB_HUMAN Peptidyl-prolyl cis-trans isomerase B OS=Homo sapiens OX=9606 GN=PPIB PE=1 SV=2	1	1	1	1	0	0	0	0	1	0	0	0	0	0	0	0	0	0	1	#DIV/0!	0	0	0	0	0	0	0	0	1	0	0	0	0	0	0	0	0	0	0	0	1	0
P24844	P24844	1	1	1	Myosin regulatory light polypeptide 9	MYL9	sp|P24844|MYL9_HUMAN Myosin regulatory light polypeptide 9 OS=Homo sapiens OX=9606 GN=MYL9 PE=1 SV=4	1	1	1	1	0	0	0	0	0	0	0	0	0	0	0	0	0	1	1	#DIV/0!	0	0	0	0	0	0	1	0	0	0	0	0	0	0	0	1	0	0	0	0	0	0
P25786	P25786	1	1	1	Proteasome subunit alpha type-1	PSMA1	sp|P25786|PSA1_HUMAN Proteasome subunit alpha type-1 OS=Homo sapiens OX=9606 GN=PSMA1 PE=1 SV=1	1	1	1	1	0	0	0	0	1	0	0	0	0	0	0	0	0	0	1	#DIV/0!	0	0	0	0	0	0	0	0	1	0	0	0	0	0	0	0	0	0	0	0	1	0
P25789	P25789	1	1	1	Proteasome subunit alpha type-4	PSMA4	sp|P25789|PSA4_HUMAN Proteasome subunit alpha type-4 OS=Homo sapiens OX=9606 GN=PSMA4 PE=1 SV=1	1	1	1	1	0	0	0	0	1	0	0	0	0	0	0	0	0	0	1	#DIV/0!	0	0	0	0	0	0	0	0	1	0	0	0	0	0	0	0	0	0	0	0	1	0
P28482	P28482	1	1	1	Mitogen-activated protein kinase 1	MAPK1	sp|P28482|MK01_HUMAN Mitogen-activated protein kinase 1 OS=Homo sapiens OX=9606 GN=MAPK1 PE=1 SV=3	1	1	1	1	0	0	0	0	1	0	0	0	1	0	1	0	0	0	1	0	0	0	0	0	0	0	0	0	1	0	1	0	1	1	0	0	0	0	0	0	1	0
Q9WC28;Q81862;Q04610;P33424;P29324	Q9WC28;Q81862;Q04610;P33424;P29324	1;1;1;1;1	1;1;1;1;1	1;1;1;1;1			sp|Q9WC28|POLN_HEVHY Non-structural polyprotein pORF1 OS=Hepatitis E virus genotype 1 (isolate Human/India/Hyderabad) OX=512346 GN=ORF1 PE=1 SV=1;sp|Q81862|POLN_HEVCH Non-structural polyprotein pORF1 OS=Hepatitis E virus genotype 1 (isolate Human/China/HeB	5	1	1	1	0	0	0	0	0	0	0	0	0	0	0	0	0	1	1	#DIV/0!	0	0	0	0	0	0	1	0	0	0	0	0	0	0	0	0	0	0	0	0	0	0
P29401	P29401	1	1	1	Transketolase	TKT	sp|P29401|TKT_HUMAN Transketolase OS=Homo sapiens OX=9606 GN=TKT PE=1 SV=3	1	1	1	1	0	0	0	0	1	0	0	0	0	0	0	0	0	0	1	#DIV/0!	0	0	0	0	0	0	0	0	1	0	0	0	0	0	0	0	0	0	0	0	1	0
P30086	P30086	1	1	1	Phosphatidylethanolamine-binding protein 1	PEBP1	sp|P30086|PEBP1_HUMAN Phosphatidylethanolamine-binding protein 1 OS=Homo sapiens OX=9606 GN=PEBP1 PE=1 SV=3	1	1	1	1	0	0	0	0	1	0	0	0	0	0	0	0	0	0	1	#DIV/0!	0	0	0	0	0	0	0	0	1	0	0	0	0	0	0	0	0	0	0	0	1	0
P30740	P30740	1	1	1	Leukocyte elastase inhibitor	SERPINB1	sp|P30740|ILEU_HUMAN Leukocyte elastase inhibitor OS=Homo sapiens OX=9606 GN=SERPINB1 PE=1 SV=1	1	1	1	1	0	0	0	0	1	0	0	0	0	0	0	0	0	0	1	#DIV/0!	0	0	0	0	0	0	0	0	1	0	0	0	0	0	0	0	0	0	0	0	1	0
P34932	P34932	1	1	1	Heat shock 70 kDa protein 4	HSPA4	sp|P34932|HSP74_HUMAN Heat shock 70 kDa protein 4 OS=Homo sapiens OX=9606 GN=HSPA4 PE=1 SV=4	1	1	1	1	0	0	0	0	1	0	0	0	0	0	0	0	0	0	1	#DIV/0!	0	0	0	0	0	0	0	0	1	0	0	0	0	0	0	0	0	0	0	0	1	0
P35030	P35030	1	1	1	Trypsin-3	PRSS3	sp|P35030|TRY3_HUMAN Trypsin-3 OS=Homo sapiens OX=9606 GN=PRSS3 PE=1 SV=2	1	1	1	1	0	0	0	0	0	0	0	0	0	0	0	1	0	0	1	#DIV/0!	0	0	0	0	0	0	0	0	0	0	0	1	0	0	0	0	0	0	0	0	0	0
P35080	P35080	1	1	1	Profilin-2	PFN2	sp|P35080|PROF2_HUMAN Profilin-2 OS=Homo sapiens OX=9606 GN=PFN2 PE=1 SV=3	1	1	1	1	0	0	0	0	1	0	0	0	0	0	0	0	0	0	1	#DIV/0!	0	0	0	0	0	0	0	0	1	0	0	0	0	0	0	0	0	0	0	0	1	0
P35221	P35221	1	1	1	Catenin alpha-1	CTNNA1	sp|P35221|CTNA1_HUMAN Catenin alpha-1 OS=Homo sapiens OX=9606 GN=CTNNA1 PE=1 SV=1	1	1	1	1	0	0	0	0	1	0	0	0	0	0	0	0	0	0	1	#DIV/0!	0	0	0	0	0	0	0	0	1	0	0	0	0	0	0	0	0	0	0	0	1	0
P35222	P35222	1	1	1	Catenin beta-1	CTNNB1	sp|P35222|CTNB1_HUMAN Catenin beta-1 OS=Homo sapiens OX=9606 GN=CTNNB1 PE=1 SV=1	1	1	1	1	0	0	0	0	1	0	0	0	0	0	0	0	0	0	1	#DIV/0!	0	0	0	0	0	0	0	0	1	0	0	0	0	0	0	0	0	0	0	0	1	0
P35268	P35268	1	1	1	60S ribosomal protein L22	RPL22	sp|P35268|RL22_HUMAN 60S ribosomal protein L22 OS=Homo sapiens OX=9606 GN=RPL22 PE=1 SV=2	1	1	1	1	0	0	0	0	1	0	1	0	0	0	0	0	0	0	1	#DIV/0!	0	0	0	0	1	0	0	0	1	0	0	0	0	0	0	1	0	0	0	0	1	0
P36957	P36957	1	1	1	Dihydrolipoyllysine-residue succinyltransferase component of 2-oxoglutarate dehydrogenase complex, mitochondrial	DLST	sp|P36957|ODO2_HUMAN Dihydrolipoyllysine-residue succinyltransferase component of 2-oxoglutarate dehydrogenase complex, mitochondrial OS=Homo sapiens OX=9606 GN=DLST PE=1 SV=4	1	1	1	1	0	0	0	0	1	0	0	0	0	0	0	0	0	0	1	#DIV/0!	0	0	0	0	0	0	0	0	1	0	0	0	0	0	0	0	0	0	0	0	1	0
P37802	P37802	1	1	1	Transgelin-2	TAGLN2	sp|P37802|TAGL2_HUMAN Transgelin-2 OS=Homo sapiens OX=9606 GN=TAGLN2 PE=1 SV=3	1	1	1	1	0	0	0	0	1	0	0	0	0	0	0	0	0	0	1	#DIV/0!	0	0	0	0	0	0	0	0	1	0	0	0	0	0	0	0	0	0	0	0	1	0
P40925	P40925	1	1	1	Malate dehydrogenase, cytoplasmic	MDH1	sp|P40925|MDHC_HUMAN Malate dehydrogenase, cytoplasmic OS=Homo sapiens OX=9606 GN=MDH1 PE=1 SV=4	1	1	1	1	0	0	0	0	1	0	1	0	0	0	0	0	0	0	1	#DIV/0!	0	0	0	0	1	0	0	0	1	0	0	0	0	0	0	0	0	0	0	0	1	0
P41250	P41250	1	1	1	Glycine--tRNA ligase	GARS	sp|P41250|GARS_HUMAN Glycine--tRNA ligase OS=Homo sapiens OX=9606 GN=GARS PE=1 SV=3	1	1	1	1	0	0	0	0	1	0	0	0	0	0	0	0	0	0	1	#DIV/0!	0	0	0	0	0	0	0	0	1	0	0	0	0	0	0	0	0	0	0	0	1	0
P43004	P43004	1	1	1	Excitatory amino acid transporter 2	SLC1A2	sp|P43004|EAA2_HUMAN Excitatory amino acid transporter 2 OS=Homo sapiens OX=9606 GN=SLC1A2 PE=1 SV=2	1	1	1	1	0	0	1	0	0	1	0	1	1	0	1	0	1	0	1	1	0	0	1	1	0	0	0	0	0	1	1	0	1	1	1	0	0	0	1	0	0	1
P46777	P46777	1	1	1	60S ribosomal protein L5	RPL5	sp|P46777|RL5_HUMAN 60S ribosomal protein L5 OS=Homo sapiens OX=9606 GN=RPL5 PE=1 SV=3	1	1	1	1	0	0	0	0	1	0	0	0	0	0	0	0	0	0	1	#DIV/0!	0	0	0	0	0	0	0	0	1	0	0	0	0	0	0	0	0	0	0	0	1	0
P46783;Q9NQ39	P46783;Q9NQ39	1;1	1;1	1;1	40S ribosomal protein S10	RPS10	sp|P46783|RS10_HUMAN 40S ribosomal protein S10 OS=Homo sapiens OX=9606 GN=RPS10 PE=1 SV=1;sp|Q9NQ39|RS10L_HUMAN Putative 40S ribosomal protein S10-like OS=Homo sapiens OX=9606 GN=RPS10P5 PE=5 SV=1	2	1	1	1	0	0	0	0	1	0	0	1	0	0	0	0	0	0	1	#DIV/0!	0	0	0	0	0	0	0	0	1	1	0	0	0	0	0	0	0	0	0	0	1	0
P47756	P47756	1	1	1	F-actin-capping protein subunit beta	CAPZB	sp|P47756|CAPZB_HUMAN F-actin-capping protein subunit beta OS=Homo sapiens OX=9606 GN=CAPZB PE=1 SV=4	1	1	1	1	0	0	0	0	1	0	0	0	0	0	0	0	0	0	1	#DIV/0!	0	0	0	0	0	0	0	0	1	0	0	0	0	0	0	0	0	0	0	0	1	0
P48728	P48728	1	1	1	Aminomethyltransferase, mitochondrial	AMT	sp|P48728|GCST_HUMAN Aminomethyltransferase, mitochondrial OS=Homo sapiens OX=9606 GN=AMT PE=1 SV=1	1	1	1	1	0	0	0	0	1	0	0	0	0	0	0	0	0	0	1	#DIV/0!	0	0	0	0	0	0	0	0	1	0	0	0	0	0	0	0	0	0	0	0	1	0
P49368	P49368	1	1	1	T-complex protein 1 subunit gamma	CCT3	sp|P49368|TCPG_HUMAN T-complex protein 1 subunit gamma OS=Homo sapiens OX=9606 GN=CCT3 PE=1 SV=4	1	1	1	1	0	0	0	0	1	0	0	0	0	0	0	0	0	0	1	#DIV/0!	0	0	0	0	0	0	0	0	1	0	0	0	0	0	0	0	0	0	0	0	1	0
P49721	P49721	1	1	1	Proteasome subunit beta type-2	PSMB2	sp|P49721|PSB2_HUMAN Proteasome subunit beta type-2 OS=Homo sapiens OX=9606 GN=PSMB2 PE=1 SV=1	1	1	1	1	0	0	0	0	1	0	0	0	0	0	0	0	0	0	1	#DIV/0!	0	0	0	0	0	0	0	0	1	0	0	0	0	0	0	0	0	0	0	0	1	0
P49767	P49767	1	1	1	Vascular endothelial growth factor C	VEGFC	sp|P49767|VEGFC_HUMAN Vascular endothelial growth factor C OS=Homo sapiens OX=9606 GN=VEGFC PE=1 SV=1	1	1	1	1	0	0	1	0	0	0	0	0	0	0	1	0	0	1	1	0	0	0	1	0	0	0	1	0	0	0	0	0	0	1	0	0	0	0	1	0	0	0
P50502;Q8IZP2	P50502;Q8IZP2	1;1	1;1	1;1	Hsc70-interacting protein	ST13	sp|P50502|F10A1_HUMAN Hsc70-interacting protein OS=Homo sapiens OX=9606 GN=ST13 PE=1 SV=2;sp|Q8IZP2|ST134_HUMAN Putative protein FAM10A4 OS=Homo sapiens OX=9606 GN=ST13P4 PE=5 SV=1	2	1	1	1	0	0	0	0	1	0	0	0	0	0	0	0	0	0	1	#DIV/0!	0	0	0	0	0	0	0	0	1	0	0	0	0	0	0	0	0	0	0	0	1	0
P51659	P51659	1	1	1	Peroxisomal multifunctional enzyme type 2	HSD17B4	sp|P51659|DHB4_HUMAN Peroxisomal multifunctional enzyme type 2 OS=Homo sapiens OX=9606 GN=HSD17B4 PE=1 SV=3	1	1	1	1	0	0	0	0	1	0	0	0	0	0	0	0	0	0	1	#DIV/0!	0	0	0	0	0	0	0	0	1	0	0	0	0	0	0	0	0	0	0	0	1	0
P51858	P51858	1	1	1	Hepatoma-derived growth factor	HDGF	sp|P51858|HDGF_HUMAN Hepatoma-derived growth factor OS=Homo sapiens OX=9606 GN=HDGF PE=1 SV=1	1	1	1	1	0	0	0	0	0	0	0	0	1	0	0	0	0	0	1	#DIV/0!	0	0	0	0	0	0	0	0	0	0	1	0	0	0	0	0	0	0	0	0	0	0
P52292	P52292	1	1	1	Importin subunit alpha-1	KPNA2	sp|P52292|IMA1_HUMAN Importin subunit alpha-1 OS=Homo sapiens OX=9606 GN=KPNA2 PE=1 SV=1	1	1	1	1	0	0	0	0	1	0	0	0	0	0	0	0	0	0	1	#DIV/0!	0	0	0	0	0	0	0	0	1	0	0	0	0	0	0	0	0	0	0	0	1	0
P52565	P52565	1	1	1	Rho GDP-dissociation inhibitor 1	ARHGDIA	sp|P52565|GDIR1_HUMAN Rho GDP-dissociation inhibitor 1 OS=Homo sapiens OX=9606 GN=ARHGDIA PE=1 SV=3	1	1	1	1	0	0	0	0	1	0	0	0	0	0	0	0	0	0	1	#DIV/0!	0	0	0	0	0	0	0	0	1	0	0	0	0	0	0	0	0	0	0	0	1	0
P54136	P54136	1	1	1	Arginine--tRNA ligase, cytoplasmic	RARS	sp|P54136|SYRC_HUMAN Arginine--tRNA ligase, cytoplasmic OS=Homo sapiens OX=9606 GN=RARS PE=1 SV=2	1	1	1	1	0	0	0	0	0	0	0	0	0	0	0	1	0	0	1	#DIV/0!	0	0	0	0	0	0	0	0	0	0	0	1	0	0	0	0	0	0	0	0	0	0
P54577	P54577	1	1	1	Tyrosine--tRNA ligase, cytoplasmic	YARS	sp|P54577|SYYC_HUMAN Tyrosine--tRNA ligase, cytoplasmic OS=Homo sapiens OX=9606 GN=YARS PE=1 SV=4	1	1	1	1	0	0	0	0	1	0	0	0	0	0	0	0	0	0	1	#DIV/0!	0	0	0	0	0	0	0	0	1	0	0	0	0	0	0	0	0	0	0	0	1	0
P54868	P54868	1	1	1	Hydroxymethylglutaryl-CoA synthase, mitochondrial	HMGCS2	sp|P54868|HMCS2_HUMAN Hydroxymethylglutaryl-CoA synthase, mitochondrial OS=Homo sapiens OX=9606 GN=HMGCS2 PE=1 SV=1	1	1	1	1	0	0	0	0	0	0	0	0	0	0	0	0	0	0	1	#DIV/0!	0	0	0	0	0	0	0	0	0	0	0	0	0	0	0	1	0	0	0	0	0	0
P54886	P54886	1	1	1	Delta-1-pyrroline-5-carboxylate synthase	ALDH18A1	sp|P54886|P5CS_HUMAN Delta-1-pyrroline-5-carboxylate synthase OS=Homo sapiens OX=9606 GN=ALDH18A1 PE=1 SV=2	1	1	1	1	0	0	0	1	0	0	1	0	0	0	0	0	0	0	1	#DIV/0!	0	0	0	0	1	0	0	1	0	0	0	0	0	0	0	1	0	0	0	1	0	0
P55145	P55145	1	1	1	Mesencephalic astrocyte-derived neurotrophic factor	MANF	sp|P55145|MANF_HUMAN Mesencephalic astrocyte-derived neurotrophic factor OS=Homo sapiens OX=9606 GN=MANF PE=1 SV=3	1	1	1	1	0	0	0	0	1	0	0	0	0	0	0	0	0	0	1	#DIV/0!	0	0	0	0	0	0	0	0	1	0	0	0	0	0	0	0	0	0	0	0	1	0
P55196	P55196	1	1	1	Afadin	MLLT4	sp|P55196|AFAD_HUMAN Afadin OS=Homo sapiens OX=9606 GN=AFDN PE=1 SV=3	1	1	1	1	0	0	0	1	0	0	0	0	0	0	0	0	0	1	1	#DIV/0!	0	0	0	0	0	0	1	1	0	0	0	0	0	0	0	1	0	0	0	1	0	0
P56192	P56192	1	1	1	Methionine--tRNA ligase, cytoplasmic	MARS	sp|P56192|SYMC_HUMAN Methionine--tRNA ligase, cytoplasmic OS=Homo sapiens OX=9606 GN=MARS PE=1 SV=2	1	1	1	1	0	0	0	0	1	0	0	0	0	0	0	1	0	0	1	#DIV/0!	0	0	0	0	0	0	0	0	1	0	0	1	0	0	0	0	0	0	0	0	1	0
P60981	P60981	1	1	1	Destrin	DSTN	sp|P60981|DEST_HUMAN Destrin OS=Homo sapiens OX=9606 GN=DSTN PE=1 SV=3	1	1	1	1	0	1	0	0	0	1	0	1	1	0	1	0	0	0	1	0	0	1	0	1	0	0	0	0	0	1	1	0	1	1	0	0	0	1	0	0	0	1
P61326;Q96A72	P61326;Q96A72	1;1	1;1	1;1	Protein mago nashi homolog	MAGOH	sp|P61326|MGN_HUMAN Protein mago nashi homolog OS=Homo sapiens OX=9606 GN=MAGOH PE=1 SV=1;sp|Q96A72|MGN2_HUMAN Protein mago nashi homolog 2 OS=Homo sapiens OX=9606 GN=MAGOHB PE=1 SV=1	2	1	1	1	0	0	0	0	0	0	0	0	0	0	0	1	0	0	1	#DIV/0!	0	0	0	0	0	0	0	0	0	0	0	1	0	0	0	0	0	0	0	0	0	0
P62318	P62318	1	1	1	Small nuclear ribonucleoprotein Sm D3	SNRPD3	sp|P62318|SMD3_HUMAN Small nuclear ribonucleoprotein Sm D3 OS=Homo sapiens OX=9606 GN=SNRPD3 PE=1 SV=1	1	1	1	1	0	0	0	0	1	0	0	0	0	0	0	0	0	0	1	#DIV/0!	0	0	0	0	0	0	0	0	1	0	0	0	0	0	0	0	0	0	0	0	1	0
P62847	P62847	1	1	1	40S ribosomal protein S24	RPS24	sp|P62847|RS24_HUMAN 40S ribosomal protein S24 OS=Homo sapiens OX=9606 GN=RPS24 PE=1 SV=1	1	1	1	1	0	0	0	0	1	0	1	0	0	0	0	0	0	0	1	#DIV/0!	0	0	0	0	1	0	0	0	1	0	0	0	0	0	0	0	0	0	0	0	1	0
P62873	P62873	1	1	1	Guanine nucleotide-binding protein G(I)/G(S)/G(T) subunit beta-1	GNB1	sp|P62873|GBB1_HUMAN Guanine nucleotide-binding protein G(I)/G(S)/G(T) subunit beta-1 OS=Homo sapiens OX=9606 GN=GNB1 PE=1 SV=3	1	1	1	1	0	0	0	0	1	0	0	0	0	0	0	0	0	0	1	#DIV/0!	0	0	0	0	0	0	0	0	1	0	0	0	0	0	0	0	0	0	0	0	1	0
P62942	P62942	1	1	1	Peptidyl-prolyl cis-trans isomerase FKBP1A	FKBP1A	sp|P62942|FKB1A_HUMAN Peptidyl-prolyl cis-trans isomerase FKBP1A OS=Homo sapiens OX=9606 GN=FKBP1A PE=1 SV=2	1	1	1	1	0	0	0	0	1	0	0	0	0	0	0	0	0	0	1	#DIV/0!	0	0	0	0	0	0	0	0	1	0	0	0	0	0	0	0	0	0	0	0	1	0
P68543	P68543	1	1	1	UBX domain-containing protein 2A	UBXN2A	sp|P68543|UBX2A_HUMAN UBX domain-containing protein 2A OS=Homo sapiens OX=9606 GN=UBXN2A PE=1 SV=1	1	1	1	1	0	0	0	0	0	0	0	0	1	0	0	0	0	0	1	#DIV/0!	0	0	0	0	0	0	0	0	0	0	1	0	0	0	0	1	0	0	0	0	0	0
P78527	P78527	1	1	1	DNA-dependent protein kinase catalytic subunit	PRKDC	sp|P78527|PRKDC_HUMAN DNA-dependent protein kinase catalytic subunit OS=Homo sapiens OX=9606 GN=PRKDC PE=1 SV=3	1	1	1	1	0	0	0	0	1	0	0	0	0	0	0	0	0	0	1	#DIV/0!	0	0	0	0	0	0	0	0	1	0	0	0	0	0	0	0	0	0	0	0	1	0
P78545	P78545	1	1	1	ETS-related transcription factor Elf-3	ELF3	sp|P78545|ELF3_HUMAN ETS-related transcription factor Elf-3 OS=Homo sapiens OX=9606 GN=ELF3 PE=1 SV=1	1	1	1	1	0	0	0	0	0	0	0	0	1	0	0	0	0	0	1	#DIV/0!	0	0	0	0	0	0	0	0	0	0	1	0	0	0	0	0	0	0	0	0	0	0
P81605	P81605	1	1	1	Dermcidin	DCD	sp|P81605|DCD_HUMAN Dermcidin OS=Homo sapiens OX=9606 GN=DCD PE=1 SV=2	1	1	1	1	1	0	0	0	0	0	0	0	0	0	0	1	0	0	1	#DIV/0!	1	0	0	0	0	0	0	0	0	0	0	1	0	0	0	0	1	0	0	0	0	0
P82979	P82979	1	1	1	SAP domain-containing ribonucleoprotein	SARNP	sp|P82979|SARNP_HUMAN SAP domain-containing ribonucleoprotein OS=Homo sapiens OX=9606 GN=SARNP PE=1 SV=3	1	1	1	1	0	0	0	0	1	0	0	0	0	0	0	1	0	0	1	#DIV/0!	0	0	0	0	0	0	0	0	1	0	0	1	0	0	0	0	0	0	0	0	1	0
P84103	P84103	1	1	1	Serine/arginine-rich splicing factor 3	SRSF3	sp|P84103|SRSF3_HUMAN Serine/arginine-rich splicing factor 3 OS=Homo sapiens OX=9606 GN=SRSF3 PE=1 SV=1	1	1	1	1	1	0	0	0	1	0	0	0	0	0	0	0	1	0	1	#DIV/0!	1	0	0	0	0	0	0	0	1	0	0	0	0	0	1	1	1	0	0	0	1	0
Q01518	Q01518	1	1	1	Adenylyl cyclase-associated protein 1	CAP1	sp|Q01518|CAP1_HUMAN Adenylyl cyclase-associated protein 1 OS=Homo sapiens OX=9606 GN=CAP1 PE=1 SV=5	1	1	1	1	0	0	0	0	1	0	0	0	0	0	0	0	0	0	1	#DIV/0!	0	0	0	0	0	0	0	0	1	0	0	0	0	0	0	0	0	0	0	0	1	0
Q06210	Q06210	1	1	1	Glutamine--fructose-6-phosphate aminotransferase [isomerizing] 1	GFPT1	sp|Q06210|GFPT1_HUMAN Glutamine--fructose-6-phosphate aminotransferase [isomerizing] 1 OS=Homo sapiens OX=9606 GN=GFPT1 PE=1 SV=3	1	1	1	1	0	0	0	0	1	0	0	0	0	0	0	0	0	0	1	#DIV/0!	0	0	0	0	0	0	0	0	1	0	0	0	0	0	0	0	0	0	0	0	1	0
Q06323	Q06323	1	1	1	Proteasome activator complex subunit 1	PSME1	sp|Q06323|PSME1_HUMAN Proteasome activator complex subunit 1 OS=Homo sapiens OX=9606 GN=PSME1 PE=1 SV=1	1	1	1	1	0	0	0	0	1	0	0	0	0	0	0	0	0	0	1	#DIV/0!	0	0	0	0	0	0	0	0	1	0	0	0	0	0	0	0	0	0	0	0	1	0
Q08170;Q13247;Q13243	Q08170;Q13247;Q13243	1;1;1	1;1;1	1;1;1	Serine/arginine-rich splicing factor 4	SRSF4	sp|Q08170|SRSF4_HUMAN Serine/arginine-rich splicing factor 4 OS=Homo sapiens OX=9606 GN=SRSF4 PE=1 SV=2;sp|Q13247|SRSF6_HUMAN Serine/arginine-rich splicing factor 6 OS=Homo sapiens OX=9606 GN=SRSF6 PE=1 SV=2;sp|Q13243|SRSF5_HUMAN Serine/arginine-rich splic	3	1	1	1	0	0	0	0	1	0	0	0	0	0	0	0	0	0	1	#DIV/0!	0	0	0	0	0	0	0	0	1	0	0	0	0	0	0	0	0	0	0	0	1	0
Q13148	Q13148	1	1	1	TAR DNA-binding protein 43	TARDBP	sp|Q13148|TADBP_HUMAN TAR DNA-binding protein 43 OS=Homo sapiens OX=9606 GN=TARDBP PE=1 SV=1	1	1	1	1	0	0	0	1	1	0	0	0	0	0	0	0	0	0	1	#DIV/0!	0	0	0	0	0	0	0	1	1	0	0	0	0	0	0	0	0	0	0	1	1	0
Q13162	Q13162	1	1	1	Peroxiredoxin-4	PRDX4	sp|Q13162|PRDX4_HUMAN Peroxiredoxin-4 OS=Homo sapiens OX=9606 GN=PRDX4 PE=1 SV=1	1	1	1	1	0	0	0	0	1	0	0	0	0	0	0	0	0	0	1	#DIV/0!	0	0	0	0	0	0	0	0	1	0	0	0	0	0	0	0	0	0	0	0	1	0
Q13263	Q13263	1	1	1	Transcription intermediary factor 1-beta	TRIM28	sp|Q13263|TIF1B_HUMAN Transcription intermediary factor 1-beta OS=Homo sapiens OX=9606 GN=TRIM28 PE=1 SV=5	1	1	1	1	0	0	0	0	1	0	0	0	0	0	0	0	0	0	1	#DIV/0!	0	0	0	0	0	0	0	0	1	0	0	0	0	0	0	0	0	0	0	0	1	0
Q13283;Q9UN86	Q13283;Q9UN86	1;1	1;1	1;1	Ras GTPase-activating protein-binding protein 1	G3BP1	sp|Q13283|G3BP1_HUMAN Ras GTPase-activating protein-binding protein 1 OS=Homo sapiens OX=9606 GN=G3BP1 PE=1 SV=1;sp|Q9UN86|G3BP2_HUMAN Ras GTPase-activating protein-binding protein 2 OS=Homo sapiens OX=9606 GN=G3BP2 PE=1 SV=2	2	1	1	1	0	0	0	0	1	0	0	0	0	0	0	0	0	0	1	#DIV/0!	0	0	0	0	0	0	0	0	1	0	0	0	0	0	0	0	0	0	0	0	1	0
Q13442	Q13442	1	1	1	28 kDa heat- and acid-stable phosphoprotein	PDAP1	sp|Q13442|HAP28_HUMAN 28 kDa heat- and acid-stable phosphoprotein OS=Homo sapiens OX=9606 GN=PDAP1 PE=1 SV=1	1	1	1	1	0	0	0	0	1	0	0	0	0	0	0	0	0	0	1	#DIV/0!	0	0	0	0	0	0	0	0	1	0	0	0	0	0	0	0	0	0	0	0	1	0
Q13480	Q13480	1	1	1	GRB2-associated-binding protein 1	GAB1	sp|Q13480|GAB1_HUMAN GRB2-associated-binding protein 1 OS=Homo sapiens OX=9606 GN=GAB1 PE=1 SV=2	1	1	1	1	0	0	0	0	0	0	0	0	0	0	0	1	0	0	1	#DIV/0!	0	0	0	0	0	0	0	0	0	0	0	1	0	0	0	0	0	0	0	0	0	0
Q13838	Q13838	1	1	1	Spliceosome RNA helicase DDX39B	DDX39B	sp|Q13838|DX39B_HUMAN Spliceosome RNA helicase DDX39B OS=Homo sapiens OX=9606 GN=DDX39B PE=1 SV=1	1	1	1	1	0	0	0	0	0	0	0	0	0	0	0	1	0	0	1	#DIV/0!	0	0	0	0	0	0	0	0	0	0	0	1	0	0	0	0	0	0	0	0	0	0
Q13884	Q13884	1	1	1	Beta-1-syntrophin	SNTB1	sp|Q13884|SNTB1_HUMAN Beta-1-syntrophin OS=Homo sapiens OX=9606 GN=SNTB1 PE=1 SV=3	1	1	1	1	0	0	0	0	0	0	0	0	1	0	0	0	0	0	1	#DIV/0!	0	0	0	0	0	0	0	0	0	0	1	0	0	0	0	0	0	0	0	0	0	0
Q14444	Q14444	1	1	1	Caprin-1	CAPRIN1	sp|Q14444|CAPR1_HUMAN Caprin-1 OS=Homo sapiens OX=9606 GN=CAPRIN1 PE=1 SV=2	1	1	1	1	0	0	0	0	1	0	0	0	0	0	0	0	0	0	1	#DIV/0!	0	0	0	0	0	0	0	0	1	0	0	0	0	0	0	0	0	0	0	0	1	0
Q14974	Q14974	1	1	1	Importin subunit beta-1	KPNB1	sp|Q14974|IMB1_HUMAN Importin subunit beta-1 OS=Homo sapiens OX=9606 GN=KPNB1 PE=1 SV=2	1	1	1	1	0	0	0	0	1	0	0	0	0	0	0	0	0	0	1	#DIV/0!	0	0	0	0	0	0	0	0	1	0	0	0	0	0	0	1	0	0	0	0	1	0
Q15020	Q15020	1	1	1	Squamous cell carcinoma antigen recognized by T-cells 3	SART3	sp|Q15020|SART3_HUMAN Squamous cell carcinoma antigen recognized by T-cells 3 OS=Homo sapiens OX=9606 GN=SART3 PE=1 SV=1	1	1	1	1	0	0	0	0	0	0	0	0	0	0	0	1	0	0	1	#DIV/0!	0	0	0	0	0	0	0	0	0	0	0	1	0	0	0	0	0	0	0	0	0	0
Q15056	Q15056	1	1	1	Eukaryotic translation initiation factor 4H	EIF4H	sp|Q15056|IF4H_HUMAN Eukaryotic translation initiation factor 4H OS=Homo sapiens OX=9606 GN=EIF4H PE=1 SV=5	1	1	1	1	0	0	1	0	0	0	0	1	1	0	0	0	0	0	1	#DIV/0!	0	0	1	0	0	0	0	0	0	1	1	0	1	0	0	0	0	0	1	0	0	0
Q15084	Q15084	1	1	1	Protein disulfide-isomerase A6	PDIA6	sp|Q15084|PDIA6_HUMAN Protein disulfide-isomerase A6 OS=Homo sapiens OX=9606 GN=PDIA6 PE=1 SV=1	1	1	1	1	0	0	0	0	1	0	0	0	0	0	0	0	0	0	1	#DIV/0!	0	0	0	0	0	0	0	0	1	0	0	0	0	0	0	0	0	0	0	0	1	0
Q15166	Q15166	1	1	1	Serum paraoxonase/lactonase 3	PON3	sp|Q15166|PON3_HUMAN Serum paraoxonase/lactonase 3 OS=Homo sapiens OX=9606 GN=PON3 PE=1 SV=3	1	1	1	1	0	0	0	0	1	0	0	0	0	0	0	0	0	0	1	#DIV/0!	0	0	0	0	0	0	0	0	1	0	0	0	0	0	0	0	0	0	0	0	1	0
Q15691	Q15691	1	1	1	Microtubule-associated protein RP/EB family member 1	MAPRE1	sp|Q15691|MARE1_HUMAN Microtubule-associated protein RP/EB family member 1 OS=Homo sapiens OX=9606 GN=MAPRE1 PE=1 SV=3	1	1	1	1	0	0	0	0	0	0	0	0	1	0	0	1	0	0	1	#DIV/0!	0	0	0	0	0	0	0	0	0	0	1	1	0	0	0	0	0	0	0	0	0	0
Q16637	Q16637	1	1	1	Survival motor neuron protein	SMN1	sp|Q16637|SMN_HUMAN Survival motor neuron protein OS=Homo sapiens OX=9606 GN=SMN1 PE=1 SV=1	1	1	1	1	0	0	0	0	0	0	0	0	0	0	0	1	0	0	1	#DIV/0!	0	0	0	0	0	0	0	0	0	0	0	1	0	0	0	0	0	0	0	0	0	0
Q16881	Q16881	1	1	1	Thioredoxin reductase 1, cytoplasmic	TXNRD1	sp|Q16881|TRXR1_HUMAN Thioredoxin reductase 1, cytoplasmic OS=Homo sapiens OX=9606 GN=TXNRD1 PE=1 SV=3	1	1	1	1	0	0	0	0	1	0	0	0	0	0	0	0	0	0	1	#DIV/0!	0	0	0	0	0	0	0	0	1	0	0	0	0	0	0	0	0	0	0	0	1	0
Q49B96	Q49B96	1	1	1	Cytochrome c oxidase assembly protein COX19	COX19	sp|Q49B96|COX19_HUMAN Cytochrome c oxidase assembly protein COX19 OS=Homo sapiens OX=9606 GN=COX19 PE=1 SV=1	1	1	1	1	0	1	1	0	0	0	0	0	0	0	1	1	0	1	1	0	0	1	1	0	0	0	1	0	0	0	0	1	1	1	0	0	0	1	1	0	0	0
Q5T200	Q5T200	1	1	1	Zinc finger CCCH domain-containing protein 13	ZC3H13	sp|Q5T200|ZC3HD_HUMAN Zinc finger CCCH domain-containing protein 13 OS=Homo sapiens OX=9606 GN=ZC3H13 PE=1 SV=1	1	1	1	1	0	0	0	0	0	0	0	0	0	0	0	0	0	1	1	#DIV/0!	0	0	0	0	0	0	1	0	0	0	0	0	0	0	0	0	0	0	0	0	0	0
Q5T5Y3	Q5T5Y3	1	1	1	Calmodulin-regulated spectrin-associated protein 1	CAMSAP1	sp|Q5T5Y3|CAMP1_HUMAN Calmodulin-regulated spectrin-associated protein 1 OS=Homo sapiens OX=9606 GN=CAMSAP1 PE=1 SV=2	1	1	1	1	0	0	0	0	0	0	0	0	0	0	0	0	0	0	1	#DIV/0!	0	0	0	0	0	0	0	0	0	0	0	0	0	0	0	1	0	0	0	0	0	0
Q5T890	Q5T890	1	1	1	DNA excision repair protein ERCC-6-like 2	ERCC6L2	sp|Q5T890|ER6L2_HUMAN DNA excision repair protein ERCC-6-like 2 OS=Homo sapiens OX=9606 GN=ERCC6L2 PE=1 SV=2	1	1	1	1	0	0	0	0	0	0	0	0	0	0	0	0	0	0	1	#DIV/0!	0	0	0	0	0	0	0	0	0	0	0	0	0	0	0	1	0	0	0	0	0	0
Q5VT66	Q5VT66	1	1	1	Mitochondrial amidoxime-reducing component 1	2021-03-01	sp|Q5VT66|MARC1_HUMAN Mitochondrial amidoxime-reducing component 1 OS=Homo sapiens OX=9606 GN=MARC1 PE=1 SV=1	1	1	1	1	0	0	0	0	0	0	0	0	0	0	0	0	0	0	1	#DIV/0!	0	0	0	0	0	0	0	0	0	0	0	0	0	0	0	1	0	0	0	0	0	0
Q68749	Q68749	1	1	1			sp|Q68749|POLG_HCVBB Genome polyprotein OS=Hepatitis C virus genotype 2c (isolate BEBE1) OX=356413 PE=1 SV=3	1	1	1	1	0	0	0	0	0	0	0	0	0	0	0	0	0	0	1	#DIV/0!	0	0	0	0	0	0	0	0	0	0	0	0	0	0	0	1	0	0	0	0	0	0
Q68G74	Q68G74	1	1	1	LIM/homeobox protein Lhx8	LHX8	sp|Q68G74|LHX8_HUMAN LIM/homeobox protein Lhx8 OS=Homo sapiens OX=9606 GN=LHX8 PE=1 SV=2	1	1	1	1	0	0	0	0	0	0	0	0	0	0	0	0	0	0	1	#DIV/0!	0	0	0	0	0	0	0	0	0	0	0	0	0	0	0	1	0	0	0	0	0	0
Q69YN4	Q69YN4	1	1	1	Protein virilizer homolog	KIAA1429	sp|Q69YN4|VIR_HUMAN Protein virilizer homolog OS=Homo sapiens OX=9606 GN=VIRMA PE=1 SV=2	1	1	1	1	0	0	0	0	0	0	0	0	0	0	0	1	0	0	1	#DIV/0!	0	0	0	0	0	0	0	0	0	0	0	1	0	0	0	0	0	0	0	0	0	0
Q6ZS81	Q6ZS81	1	1	1	WD repeat- and FYVE domain-containing protein 4	WDFY4	sp|Q6ZS81|WDFY4_HUMAN WD repeat- and FYVE domain-containing protein 4 OS=Homo sapiens OX=9606 GN=WDFY4 PE=1 SV=3	1	1	1	1	0	0	1	0	0	0	0	0	0	0	0	0	0	0	1	#DIV/0!	0	0	1	0	0	0	0	0	0	0	0	0	0	0	0	0	0	0	1	0	0	0
Q7LDG7	Q7LDG7	1	1	1	RAS guanyl-releasing protein 2	RASGRP2	sp|Q7LDG7|GRP2_HUMAN RAS guanyl-releasing protein 2 OS=Homo sapiens OX=9606 GN=RASGRP2 PE=1 SV=1	1	1	1	1	0	0	0	0	1	0	0	0	0	0	0	0	0	0	1	#DIV/0!	0	0	0	0	0	0	0	0	1	0	0	0	0	0	0	0	0	0	0	0	1	0
Q7RTW8	Q7RTW8	1	1	1	Otoancorin	OTOA	sp|Q7RTW8|OTOAN_HUMAN Otoancorin OS=Homo sapiens OX=9606 GN=OTOA PE=1 SV=1	1	1	1	1	0	0	0	0	0	0	0	0	0	0	0	0	0	1	1	#DIV/0!	0	0	0	0	0	0	1	0	0	0	0	0	0	0	0	0	0	0	0	0	0	0
Q7Z2W7	Q7Z2W7	1	1	1	Transient receptor potential cation channel subfamily M member 8	TRPM8	sp|Q7Z2W7|TRPM8_HUMAN Transient receptor potential cation channel subfamily M member 8 OS=Homo sapiens OX=9606 GN=TRPM8 PE=1 SV=2	1	1	1	1	0	0	0	1	0	0	0	0	0	0	0	1	0	0	1	#DIV/0!	0	0	0	0	0	0	0	1	0	0	0	1	0	0	0	0	0	0	0	1	0	0
Q7Z7M0	Q7Z7M0	1	1	1	Multiple epidermal growth factor-like domains protein 8	MEGF8	sp|Q7Z7M0|MEGF8_HUMAN Multiple epidermal growth factor-like domains protein 8 OS=Homo sapiens OX=9606 GN=MEGF8 PE=1 SV=2	1	1	1	1	0	0	0	0	1	0	0	0	0	0	0	0	0	0	1	#DIV/0!	0	0	0	0	0	0	0	0	1	0	0	0	0	0	0	0	0	0	0	0	1	0
Q86UP2	Q86UP2	1	1	1	Kinectin	KTN1	sp|Q86UP2|KTN1_HUMAN Kinectin OS=Homo sapiens OX=9606 GN=KTN1 PE=1 SV=1	1	1	1	1	0	0	0	0	0	0	1	0	0	0	0	0	0	0	1	#DIV/0!	0	0	0	0	1	0	0	0	0	0	0	0	0	0	0	0	0	0	0	0	0	0
Q86UU0	Q86UU0	1	1	1	B-cell CLL/lymphoma 9-like protein	BCL9L	sp|Q86UU0|BCL9L_HUMAN B-cell CLL/lymphoma 9-like protein OS=Homo sapiens OX=9606 GN=BCL9L PE=1 SV=1	1	1	1	1	0	0	0	1	0	0	0	0	0	0	0	0	0	0	1	#DIV/0!	0	0	0	0	0	0	0	1	0	0	0	0	0	0	0	0	0	0	0	1	0	0
Q86VV8	Q86VV8	1	1	1	Rotatin	RTTN	sp|Q86VV8|RTTN_HUMAN Rotatin OS=Homo sapiens OX=9606 GN=RTTN PE=1 SV=3	1	1	1	1	0	0	0	0	1	0	0	0	0	0	0	1	0	0	1	#DIV/0!	0	0	0	0	0	0	0	0	1	0	0	1	0	0	0	0	0	0	0	0	1	0
Q86XH1	Q86XH1	1	1	1	IQ and AAA domain-containing protein 1	IQCA1	sp|Q86XH1|DRC11_HUMAN Dynein regulatory complex protein 11 OS=Homo sapiens OX=9606 GN=IQCA1 PE=2 SV=1	1	1	1	1	0	0	0	1	0	0	0	0	0	0	0	0	1	0	1	#DIV/0!	0	0	0	0	0	0	0	1	0	0	0	0	0	0	1	0	0	0	0	1	0	0
Q8IV76	Q8IV76	1	1	1	PAS domain-containing protein 1	PASD1	sp|Q8IV76|PASD1_HUMAN Circadian clock protein PASD1 OS=Homo sapiens OX=9606 GN=PASD1 PE=1 SV=1	1	1	1	1	0	0	0	0	0	0	0	0	0	0	0	0	0	1	1	#DIV/0!	0	0	0	0	0	0	1	0	0	0	0	0	0	0	0	0	0	0	0	0	0	0
Q8IWW6	Q8IWW6	1	1	1	Rho GTPase-activating protein 12	ARHGAP12	sp|Q8IWW6|RHG12_HUMAN Rho GTPase-activating protein 12 OS=Homo sapiens OX=9606 GN=ARHGAP12 PE=1 SV=1	1	1	1	1	0	0	0	0	0	0	0	0	0	0	0	1	0	0	1	#DIV/0!	0	0	0	0	0	0	0	0	0	0	0	1	0	0	0	0	0	0	0	0	0	0
Q8N7H5	Q8N7H5	1	1	1	RNA polymerase II-associated factor 1 homolog	PAF1	sp|Q8N7H5|PAF1_HUMAN RNA polymerase II-associated factor 1 homolog OS=Homo sapiens OX=9606 GN=PAF1 PE=1 SV=2	1	1	1	1	1	0	1	1	0	0	1	0	0	0	0	0	1	0	1	#DIV/0!	1	0	1	0	1	0	0	1	0	0	0	0	0	0	1	1	1	0	1	1	0	0
Q8NBS9	Q8NBS9	1	1	1	Thioredoxin domain-containing protein 5	TXNDC5	sp|Q8NBS9|TXND5_HUMAN Thioredoxin domain-containing protein 5 OS=Homo sapiens OX=9606 GN=TXNDC5 PE=1 SV=2	1	1	1	1	0	0	0	0	1	0	0	0	0	0	0	0	0	0	1	#DIV/0!	0	0	0	0	0	0	0	0	1	0	0	0	0	0	0	0	0	0	0	0	1	0
Q8NGJ1	Q8NGJ1	1	1	1	Olfactory receptor 4D6	OR4D6	sp|Q8NGJ1|OR4D6_HUMAN Olfactory receptor 4D6 OS=Homo sapiens OX=9606 GN=OR4D6 PE=2 SV=1	1	1	1	1	0	0	1	0	0	0	0	0	0	0	0	0	0	0	1	#DIV/0!	0	0	1	0	0	0	0	0	0	0	0	0	0	0	0	0	0	0	1	0	0	0
Q8TAA3	Q8TAA3	1	1	1	Proteasome subunit alpha type-7-like	PSMA8	sp|Q8TAA3|PSMA8_HUMAN Proteasome subunit alpha-type 8 OS=Homo sapiens OX=9606 GN=PSMA8 PE=2 SV=3	1	1	1	1	0	0	0	1	0	1	0	1	0	0	0	0	0	0	1	#DIV/0!	0	0	0	1	0	0	0	1	0	1	0	0	0	0	0	0	0	0	0	1	0	1
Q8TDY2	Q8TDY2	1	1	1	RB1-inducible coiled-coil protein 1	RB1CC1	sp|Q8TDY2|RBCC1_HUMAN RB1-inducible coiled-coil protein 1 OS=Homo sapiens OX=9606 GN=RB1CC1 PE=1 SV=3	1	1	1	1	1	0	0	0	0	0	0	0	0	0	0	0	0	0	1	#DIV/0!	1	0	0	0	0	0	0	0	0	0	0	0	0	0	0	0	1	0	0	0	0	0
Q8TF72	Q8TF72	1	1	1	Protein Shroom3	SHROOM3	sp|Q8TF72|SHRM3_HUMAN Protein Shroom3 OS=Homo sapiens OX=9606 GN=SHROOM3 PE=1 SV=2	1	1	1	1	0	0	0	1	1	0	1	1	0	0	0	0	0	0	1	#DIV/0!	0	0	0	0	1	0	0	1	1	1	0	0	0	0	0	0	0	0	0	1	1	0
Q92541	Q92541	1	1	1	RNA polymerase-associated protein RTF1 homolog	RTF1	sp|Q92541|RTF1_HUMAN RNA polymerase-associated protein RTF1 homolog OS=Homo sapiens OX=9606 GN=RTF1 PE=1 SV=4	1	1	1	1	1	0	1	0	0	0	1	0	1	0	1	0	1	0	1	1	1	0	1	0	1	0	0	0	0	0	1	0	0	1	1	1	1	0	1	0	0	0
Q92785	Q92785	1	1	1	Zinc finger protein ubi-d4	DPF2	sp|Q92785|REQU_HUMAN Zinc finger protein ubi-d4 OS=Homo sapiens OX=9606 GN=DPF2 PE=1 SV=2	1	1	1	1	0	0	0	0	0	0	0	0	0	0	0	1	0	0	1	#DIV/0!	0	0	0	0	0	0	0	0	0	0	0	1	0	0	0	0	0	0	0	0	0	0
Q969G3	Q969G3	1	1	1	SWI/SNF-related matrix-associated actin-dependent regulator of chromatin subfamily E member 1	SMARCE1	sp|Q969G3|SMCE1_HUMAN SWI/SNF-related matrix-associated actin-dependent regulator of chromatin subfamily E member 1 OS=Homo sapiens OX=9606 GN=SMARCE1 PE=1 SV=2	1	1	1	1	0	0	0	0	0	0	0	0	0	0	0	1	0	0	1	#DIV/0!	0	0	0	0	0	0	0	0	0	0	0	1	0	0	0	0	0	0	0	0	0	0
Q96AQ8	Q96AQ8	1	1	1	Mitochondrial calcium uniporter regulator 1	MCUR1	sp|Q96AQ8|MCUR1_HUMAN Mitochondrial calcium uniporter regulator 1 OS=Homo sapiens OX=9606 GN=MCUR1 PE=1 SV=1	1	1	1	1	0	0	0	0	0	0	0	0	0	0	0	0	0	0	1	#DIV/0!	0	0	0	0	0	0	0	0	0	0	0	0	0	0	0	1	0	0	0	0	0	0
Q96BQ5	Q96BQ5	1	1	1	Coiled-coil domain-containing protein 127	CCDC127	sp|Q96BQ5|CC127_HUMAN Coiled-coil domain-containing protein 127 OS=Homo sapiens OX=9606 GN=CCDC127 PE=1 SV=1	1	1	1	1	0	0	0	0	0	0	0	0	1	0	0	0	0	0	1	#DIV/0!	0	0	0	0	0	0	0	0	0	0	1	0	0	0	0	0	0	0	0	0	0	0
Q96BV0	Q96BV0	1	1	1	Zinc finger protein 775	ZNF775	sp|Q96BV0|ZN775_HUMAN Zinc finger protein 775 OS=Homo sapiens OX=9606 GN=ZNF775 PE=1 SV=2	1	1	1	1	1	0	1	1	0	1	1	0	0	0	1	1	1	0	1	1	1	0	1	1	1	0	0	1	0	0	0	1	0	1	1	0	1	0	1	1	0	1
Q96JB1	Q96JB1	1	1	1	Dynein heavy chain 8, axonemal	DNAH8	sp|Q96JB1|DYH8_HUMAN Dynein heavy chain 8, axonemal OS=Homo sapiens OX=9606 GN=DNAH8 PE=1 SV=2	1	1	1	1	0	1	0	0	0	0	0	0	0	0	0	0	0	0	1	#DIV/0!	0	1	0	0	0	0	0	0	0	0	0	0	0	0	0	0	0	1	0	0	0	0
Q99460	Q99460	1	1	1	26S proteasome non-ATPase regulatory subunit 1	PSMD1	sp|Q99460|PSMD1_HUMAN 26S proteasome non-ATPase regulatory subunit 1 OS=Homo sapiens OX=9606 GN=PSMD1 PE=1 SV=2	1	1	1	1	0	0	0	0	1	0	0	0	0	0	0	0	0	0	1	#DIV/0!	0	0	0	0	0	0	0	0	1	0	0	0	0	0	0	0	0	0	0	0	1	0
Q99497	Q99497	1	1	1	Protein deglycase DJ-1	PARK7	sp|Q99497|PARK7_HUMAN Protein/nucleic acid deglycase DJ-1 OS=Homo sapiens OX=9606 GN=PARK7 PE=1 SV=2	1	1	1	1	0	0	0	0	1	0	0	0	0	0	0	0	0	0	1	#DIV/0!	0	0	0	0	0	0	0	0	1	0	0	0	0	0	0	0	0	0	0	0	1	0
Q99733	Q99733	1	1	1	Nucleosome assembly protein 1-like 4	NAP1L4	sp|Q99733|NP1L4_HUMAN Nucleosome assembly protein 1-like 4 OS=Homo sapiens OX=9606 GN=NAP1L4 PE=1 SV=1	1	1	1	1	0	0	0	0	1	0	0	0	0	0	0	0	0	0	1	#DIV/0!	0	0	0	0	0	0	0	0	1	0	0	0	0	0	0	0	0	0	0	0	1	0
Q99767	Q99767	1	1	1	Amyloid beta A4 precursor protein-binding family A member 2	APBA2	sp|Q99767|APBA2_HUMAN Amyloid-beta A4 precursor protein-binding family A member 2 OS=Homo sapiens OX=9606 GN=APBA2 PE=1 SV=3	1	1	1	1	1	0	0	0	0	0	1	0	1	0	1	0	1	0	1	1	1	0	0	0	1	0	0	0	0	0	1	0	0	1	1	1	1	0	0	0	0	0
Q99798	Q99798	1	1	1	Aconitate hydratase, mitochondrial	ACO2	sp|Q99798|ACON_HUMAN Aconitate hydratase, mitochondrial OS=Homo sapiens OX=9606 GN=ACO2 PE=1 SV=2	1	1	1	1	0	0	0	0	1	0	0	0	0	0	0	0	0	0	1	#DIV/0!	0	0	0	0	0	0	0	0	1	0	0	0	0	0	0	0	0	0	0	0	1	0
Q99832	Q99832	1	1	1	T-complex protein 1 subunit eta	CCT7	sp|Q99832|TCPH_HUMAN T-complex protein 1 subunit eta OS=Homo sapiens OX=9606 GN=CCT7 PE=1 SV=2	1	1	1	1	0	0	0	0	1	0	0	0	0	0	0	0	0	0	1	#DIV/0!	0	0	0	0	0	0	0	0	1	0	0	0	0	0	0	0	0	0	0	0	1	0
Q9BQI6	Q9BQI6	1	1	1	Ankyrin repeat domain-containing protein 32	ANKRD32	sp|Q9BQI6|SLF1_HUMAN SMC5-SMC6 complex localization factor protein 1 OS=Homo sapiens OX=9606 GN=SLF1 PE=1 SV=2	1	1	1	1	0	1	0	1	0	1	0	1	0	0	0	1	0	0	1	#DIV/0!	0	1	0	1	0	0	0	1	0	1	0	1	0	0	0	0	0	1	0	1	0	1
Q9BRF8	Q9BRF8	1	1	1	Serine/threonine-protein phosphatase CPPED1	CPPED1	sp|Q9BRF8|CPPED_HUMAN Serine/threonine-protein phosphatase CPPED1 OS=Homo sapiens OX=9606 GN=CPPED1 PE=1 SV=3	1	1	1	1	0	0	0	0	1	0	0	0	0	0	0	0	0	0	1	#DIV/0!	0	0	0	0	0	0	0	0	1	0	0	0	0	0	0	0	0	0	0	0	1	0
Q9BTT0	Q9BTT0	1	1	1	Acidic leucine-rich nuclear phosphoprotein 32 family member E	ANP32E	sp|Q9BTT0|AN32E_HUMAN Acidic leucine-rich nuclear phosphoprotein 32 family member E OS=Homo sapiens OX=9606 GN=ANP32E PE=1 SV=1	1	1	1	1	0	0	0	0	1	0	0	0	0	0	0	0	0	0	1	#DIV/0!	0	0	0	0	0	0	0	0	1	0	0	0	0	0	0	0	0	0	0	0	1	0
Q9BYR6	Q9BYR6	1	1	1	Keratin-associated protein 3-3	KRTAP3-3	sp|Q9BYR6|KRA33_HUMAN Keratin-associated protein 3-3 OS=Homo sapiens OX=9606 GN=KRTAP3-3 PE=1 SV=1	1	1	1	1	0	0	0	0	0	0	0	1	0	0	0	0	0	0	1	#DIV/0!	0	0	0	0	0	0	0	0	0	1	0	0	0	0	0	0	0	0	0	0	0	0
Q9BZK7	Q9BZK7	1	1	1	F-box-like/WD repeat-containing protein TBL1XR1	TBL1XR1	sp|Q9BZK7|TBL1R_HUMAN F-box-like/WD repeat-containing protein TBL1XR1 OS=Homo sapiens OX=9606 GN=TBL1XR1 PE=1 SV=1	1	1	1	1	0	0	0	0	0	0	0	0	0	0	0	1	0	0	1	#DIV/0!	0	0	0	0	0	0	0	0	0	0	0	1	0	0	0	0	0	0	0	0	0	0
Q9GZP1	Q9GZP1	1	1	1	Neurensin-2	NRSN2	sp|Q9GZP1|NRSN2_HUMAN Neurensin-2 OS=Homo sapiens OX=9606 GN=NRSN2 PE=2 SV=1	1	1	1	1	0	0	0	0	0	0	0	0	0	0	0	0	0	1	1	#DIV/0!	0	0	0	0	0	0	1	0	0	0	0	0	0	0	0	0	0	0	0	0	0	0
Q9H582	Q9H582	1	1	1	Zinc finger protein 644	ZNF644	sp|Q9H582|ZN644_HUMAN Zinc finger protein 644 OS=Homo sapiens OX=9606 GN=ZNF644 PE=1 SV=2	1	1	1	1	1	0	1	0	0	0	1	0	0	0	0	0	0	1	1	#DIV/0!	1	0	1	0	1	0	1	0	0	0	0	0	1	0	0	0	1	0	1	0	0	0
Q9NQ48	Q9NQ48	1	1	1	Leucine zipper transcription factor-like protein 1	LZTFL1	sp|Q9NQ48|LZTL1_HUMAN Leucine zipper transcription factor-like protein 1 OS=Homo sapiens OX=9606 GN=LZTFL1 PE=1 SV=1	1	1	1	1	0	0	0	0	0	0	0	0	0	0	0	0	0	0	1	#DIV/0!	0	0	0	0	0	0	0	0	0	0	0	0	0	0	0	1	0	0	0	0	0	0
Q9NR30	Q9NR30	1	1	1	Nucleolar RNA helicase 2	DDX21	sp|Q9NR30|DDX21_HUMAN Nucleolar RNA helicase 2 OS=Homo sapiens OX=9606 GN=DDX21 PE=1 SV=5	1	1	1	1	0	0	0	0	1	0	0	0	0	0	0	0	0	0	1	#DIV/0!	0	0	0	0	0	0	0	0	1	0	0	0	0	0	0	0	0	0	0	0	1	0
Q9NR56	Q9NR56	1	1	1	Muscleblind-like protein 1	MBNL1	sp|Q9NR56|MBNL1_HUMAN Muscleblind-like protein 1 OS=Homo sapiens OX=9606 GN=MBNL1 PE=1 SV=2	1	1	1	1	0	0	0	0	1	0	0	0	0	0	0	0	0	0	1	#DIV/0!	0	0	0	0	0	0	0	0	1	0	0	0	0	0	0	0	0	0	0	0	1	0
Q9NRY2	Q9NRY2	1	1	1	SOSS complex subunit C	INIP	sp|Q9NRY2|SOSSC_HUMAN SOSS complex subunit C OS=Homo sapiens OX=9606 GN=INIP PE=1 SV=1	1	1	1	1	0	0	0	0	0	1	0	0	0	0	1	0	0	0	1	0	0	0	0	1	0	0	0	0	0	0	0	0	0	1	0	0	0	0	0	0	0	1
Q9NS69	Q9NS69	1	1	1	Mitochondrial import receptor subunit TOM22 homolog	TOMM22	sp|Q9NS69|TOM22_HUMAN Mitochondrial import receptor subunit TOM22 homolog OS=Homo sapiens OX=9606 GN=TOMM22 PE=1 SV=3	1	1	1	1	0	0	0	0	1	0	0	0	0	0	0	0	0	0	1	#DIV/0!	0	0	0	0	0	0	0	0	1	0	0	0	0	0	0	0	0	0	0	0	1	0
Q9NU22	Q9NU22	1	1	1	Midasin	MDN1	sp|Q9NU22|MDN1_HUMAN Midasin OS=Homo sapiens OX=9606 GN=MDN1 PE=1 SV=2	1	1	1	1	1	0	1	0	0	0	0	0	0	0	1	0	0	0	1	0	1	0	1	0	0	0	0	0	0	0	0	0	0	1	0	0	1	0	1	0	0	0
Q9NWH9	Q9NWH9	1	1	1	SAFB-like transcription modulator	SLTM	sp|Q9NWH9|SLTM_HUMAN SAFB-like transcription modulator OS=Homo sapiens OX=9606 GN=SLTM PE=1 SV=2	1	1	1	1	0	0	0	0	0	0	0	0	0	0	0	0	0	0	1	#DIV/0!	0	0	0	0	0	0	0	0	0	0	0	0	1	0	0	0	0	0	0	0	0	0
Q9NXH8	Q9NXH8	1	1	1	Torsin-4A	TOR4A	sp|Q9NXH8|TOR4A_HUMAN Torsin-4A OS=Homo sapiens OX=9606 GN=TOR4A PE=1 SV=2	1	1	1	1	0	0	0	0	0	0	0	1	0	0	0	0	0	0	1	#DIV/0!	0	0	0	0	0	0	0	0	0	1	0	0	0	0	0	0	0	0	0	0	0	0
Q9NY47	Q9NY47	1	1	1	Voltage-dependent calcium channel subunit alpha-2/delta-2	CACNA2D2	sp|Q9NY47|CA2D2_HUMAN Voltage-dependent calcium channel subunit alpha-2/delta-2 OS=Homo sapiens OX=9606 GN=CACNA2D2 PE=1 SV=2	1	1	1	1	0	1	0	1	0	1	0	0	0	0	0	0	1	1	1	#DIV/0!	0	1	0	1	0	0	1	1	0	0	0	0	0	0	1	0	0	1	0	1	0	1
Q9NZT1	Q9NZT1	1	1	1	Calmodulin-like protein 5	CALML5	sp|Q9NZT1|CALL5_HUMAN Calmodulin-like protein 5 OS=Homo sapiens OX=9606 GN=CALML5 PE=1 SV=2	1	1	1	1	0	0	0	0	0	0	0	0	0	0	0	0	1	1	1	#DIV/0!	0	0	0	0	0	0	1	0	0	0	0	0	0	0	1	0	0	0	0	0	0	0
Q9P2E9	Q9P2E9	1	1	1	Ribosome-binding protein 1	RRBP1	sp|Q9P2E9|RRBP1_HUMAN Ribosome-binding protein 1 OS=Homo sapiens OX=9606 GN=RRBP1 PE=1 SV=5	1	1	1	1	0	0	0	0	1	0	0	0	0	0	0	0	0	0	1	#DIV/0!	0	0	0	0	0	0	0	0	1	0	0	0	0	0	0	0	0	0	0	0	1	0
Q9UGI6	Q9UGI6	1	1	1	Small conductance calcium-activated potassium channel protein 3	KCNN3	sp|Q9UGI6|KCNN3_HUMAN Small conductance calcium-activated potassium channel protein 3 OS=Homo sapiens OX=9606 GN=KCNN3 PE=2 SV=2	1	1	1	1	0	0	0	0	0	0	0	0	0	0	0	0	0	1	1	#DIV/0!	0	0	0	0	0	0	1	0	0	0	0	0	0	0	0	0	0	0	0	0	0	0
Q9UHD8	Q9UHD8	1	1	1	Septin-9	2021-09-09	sp|Q9UHD8|SEPT9_HUMAN Septin-9 OS=Homo sapiens OX=9606 GN=SEPT9 PE=1 SV=2	1	1	1	1	0	0	0	0	1	0	0	0	0	0	0	0	0	0	1	#DIV/0!	0	0	0	0	0	0	0	0	1	0	0	0	0	0	0	0	0	0	0	0	1	0
Q9UI46	Q9UI46	1	1	1	Dynein intermediate chain 1, axonemal	DNAI1	sp|Q9UI46|DNAI1_HUMAN Dynein intermediate chain 1, axonemal OS=Homo sapiens OX=9606 GN=DNAI1 PE=1 SV=1	1	1	1	1	0	0	0	0	0	0	0	0	0	0	0	0	0	0	1	#DIV/0!	0	0	0	0	0	0	0	0	0	0	0	0	0	0	0	1	0	0	0	0	0	0
Q9UKX5	Q9UKX5	1	1	1	Integrin alpha-11	ITGA11	sp|Q9UKX5|ITA11_HUMAN Integrin alpha-11 OS=Homo sapiens OX=9606 GN=ITGA11 PE=1 SV=2	1	1	1	1	0	0	0	0	0	0	1	1	0	0	0	0	0	0	1	#DIV/0!	0	0	0	0	1	0	0	0	0	1	0	0	0	0	0	0	0	0	0	0	0	0
Q9UL46	Q9UL46	1	1	1	Proteasome activator complex subunit 2	PSME2	sp|Q9UL46|PSME2_HUMAN Proteasome activator complex subunit 2 OS=Homo sapiens OX=9606 GN=PSME2 PE=1 SV=4	1	1	1	1	0	0	0	0	1	0	0	0	0	0	0	0	0	0	1	#DIV/0!	0	0	0	0	0	0	0	0	1	0	0	0	0	0	0	0	0	0	0	0	1	0
Q9Y230	Q9Y230	1	1	1	RuvB-like 2	RUVBL2	sp|Q9Y230|RUVB2_HUMAN RuvB-like 2 OS=Homo sapiens OX=9606 GN=RUVBL2 PE=1 SV=3	1	1	1	1	0	0	0	0	1	0	0	0	0	0	0	0	0	0	1	#DIV/0!	0	0	0	0	0	0	0	0	1	0	0	0	0	0	0	0	0	0	0	0	1	0
Q9Y2L6	Q9Y2L6	1	1	1	FERM domain-containing protein 4B	FRMD4B	sp|Q9Y2L6|FRM4B_HUMAN FERM domain-containing protein 4B OS=Homo sapiens OX=9606 GN=FRMD4B PE=1 SV=4	1	1	1	1	0	0	0	0	0	0	0	0	0	0	0	1	0	0	1	#DIV/0!	0	0	0	0	0	0	0	0	0	0	0	1	0	0	0	0	0	0	0	0	0	0
Q9Y2Q3	Q9Y2Q3	1	1	1	Glutathione S-transferase kappa 1	GSTK1	sp|Q9Y2Q3|GSTK1_HUMAN Glutathione S-transferase kappa 1 OS=Homo sapiens OX=9606 GN=GSTK1 PE=1 SV=3	1	1	1	1	0	0	0	0	1	0	0	0	0	0	0	0	0	0	1	#DIV/0!	0	0	0	0	0	0	0	0	1	0	0	0	0	0	0	0	0	0	0	0	1	0
Q9Y2Z0	Q9Y2Z0	1	1	1	Suppressor of G2 allele of SKP1 homolog	SUGT1	sp|Q9Y2Z0|SGT1_HUMAN Protein SGT1 homolog OS=Homo sapiens OX=9606 GN=SUGT1 PE=1 SV=3	1	1	1	1	0	0	0	0	1	0	1	0	0	0	0	0	0	0	1	#DIV/0!	0	0	0	0	1	0	0	0	1	0	0	0	1	0	0	0	0	0	0	0	1	0
Q9Y383	Q9Y383	1	1	1	Putative RNA-binding protein Luc7-like 2	LUC7L2	sp|Q9Y383|LC7L2_HUMAN Putative RNA-binding protein Luc7-like 2 OS=Homo sapiens OX=9606 GN=LUC7L2 PE=1 SV=2	1	1	1	1	0	0	0	0	1	0	0	0	0	0	0	0	0	0	1	#DIV/0!	0	0	0	0	0	0	0	0	1	0	0	0	0	0	0	0	0	0	0	0	1	0
Q9Y3I0	Q9Y3I0	1	1	1	tRNA-splicing ligase RtcB homolog	RTCB	sp|Q9Y3I0|RTCB_HUMAN tRNA-splicing ligase RtcB homolog OS=Homo sapiens OX=9606 GN=RTCB PE=1 SV=1	1	1	1	1	0	0	0	0	1	0	0	0	0	0	0	0	0	0	1	#DIV/0!	0	0	0	0	0	0	0	0	1	0	0	0	0	0	0	0	0	0	0	0	1	0
Q9Y490	Q9Y490	1	1	1	Talin-1	TLN1	sp|Q9Y490|TLN1_HUMAN Talin-1 OS=Homo sapiens OX=9606 GN=TLN1 PE=1 SV=3	1	1	1	1	0	0	0	0	1	0	0	0	0	0	0	0	0	0	1	#DIV/0!	0	0	0	0	0	0	0	0	1	0	0	0	0	0	0	0	0	0	0	0	1	0
Q9Y4F4	Q9Y4F4	1	1	1	Protein FAM179B	FAM179B	sp|Q9Y4F4|TGRM1_HUMAN TOG array regulator of axonemal microtubules protein 1 OS=Homo sapiens OX=9606 GN=TOGARAM1 PE=1 SV=4	1	1	1	1	0	0	0	0	0	0	0	0	0	0	1	0	1	0	1	1	0	0	0	0	0	0	0	0	0	0	0	0	0	1	1	1	0	0	0	0	0	0
Q9Y5C1	Q9Y5C1	1	1	1	Angiopoietin-related protein 3	ANGPTL3	sp|Q9Y5C1|ANGL3_HUMAN Angiopoietin-related protein 3 OS=Homo sapiens OX=9606 GN=ANGPTL3 PE=1 SV=1	1	1	1	1	0	0	0	0	1	0	1	0	0	0	0	0	1	0	1	#DIV/0!	0	0	0	0	1	0	0	0	1	0	0	0	0	0	1	1	0	0	0	0	1	0
Q9Y6N6	Q9Y6N6	1	1	1	Laminin subunit gamma-3	LAMC3	sp|Q9Y6N6|LAMC3_HUMAN Laminin subunit gamma-3 OS=Homo sapiens OX=9606 GN=LAMC3 PE=1 SV=3	1	1	1	1	0	0	0	1	0	0	0	0	0	0	0	0	0	0	1	#DIV/0!	0	0	0	0	0	0	0	1	0	0	0	0	0	0	0	0	0	0	0	1	0	0
Q9Y6V0	Q9Y6V0	1	1	1	Protein piccolo	PCLO	sp|Q9Y6V0|PCLO_HUMAN Protein piccolo OS=Homo sapiens OX=9606 GN=PCLO PE=1 SV=5	1	1	1	1	0	0	0	0	1	0	1	0	0	0	0	0	0	1	1	#DIV/0!	0	0	0	0	1	0	1	0	1	0	0	0	0	0	0	0	0	0	0	0	1	0
P04259	P04259	19	1	0	Keratin, type II cytoskeletal 6B	KRT6B	sp|P04259|K2C6B_HUMAN Keratin, type II cytoskeletal 6B OS=Homo sapiens OX=9606 GN=KRT6B PE=1 SV=5	1	19	1	0	4	4	6	7	8	5	6	8	7	13	4	5	6	7	1	1.5	0	0	0	0	0	1	0	0	0	0	0	0	0	0	0	1	0	0	0	0	0	0
Q13509	Q13509	10	1	0	Tubulin beta-3 chain	TUBB3	sp|Q13509|TBB3_HUMAN Tubulin beta-3 chain OS=Homo sapiens OX=9606 GN=TUBB3 PE=1 SV=2	1	10	1	0	0	1	0	1	4	1	5	4	4	7	2	1	0	5	1	0	0	0	0	0	0	1	0	0	0	0	0	0	0	0	0	0	0	0	0	0	0	0
[truncated: 133 more columns]

## Sheet: Sorted >2 fold dmso
Majority protein IDs	Protein names	Gene names	Fasta headers	Intensity UNGKO Clone 1_DMSO_IGG	Intensity UNGKO Clone 1_DMSO_UNG	Intensity UNGKO Clone 2_DMSO_IGG	Intensity UNGKO Clone 2_DMSO_UNG	Intensity UNG Clone 1_DMSO_IGG	Intensity UNG Clone 2_DMSO_IGG	Intensity UNGKO Clone 1_FLOX_UNG	Intensity UNGKO Clone 2_FLOX_IGG	Intensity UNGKO Clone 2_FLOX_UNG	Intensity UNG Clone 1_DMSO_IGG	Intensity UNG Clone 1_FLOX_IGG	Intensity UNG Clone 2_FLOX_IGG	Intensity UNG Clone 1_DMSO_UNG	Intensity UNG Clone 2_DMSO_UNG	Intensity UNG Clone 1_FLOX_UNG	Intensity UNG Clone 2_FLOX_UNG		Intensity: Average Controls DMSO	Intensity: Average Controls Flox	Intensity: Average UNG DMSO	Intensity: Average UNG Flox		Fold Change Intensity DMSO	Fold Change Intensity Flox		Peptides UNGKO Clone 1_DMSO_IGG	Peptides UNGKO Clone 1_DMSO_UNG	Peptides UNGKO Clone 2_DMSO_IGG	Peptides UNGKO Clone 2_DMSO_UNG	Peptides UNG Clone 1_DMSO_IGG	Peptides UNG Clone 2_DMSO_IGG	Peptides UNGKO Clone 1_FLOX_IGG	Peptides UNGKO Clone 1_FLOX_UNG	Peptides UNGKO Clone 2_FLOX_IGG	Peptides UNGKO Clone 2_FLOX_UNG	Peptides UNG Clone 1_FLOX_IGG	Peptides UNG Clone 2_FLOX_IGG	Peptides UNG Clone 1_DMSO_UNG	Peptides UNG Clone 1_FLOX_UNG	Peptides UNG Clone 2_DMSO_UNG	Peptides UNG Clone 2_FLOX_UNG
Q9HCL3	Zinc finger protein 14 homolog	ZFP14	sp|Q9HCL3|ZFP14_HUMAN Zinc finger protein 14 homolog OS=Homo sapiens OX=9606 GN=ZFP14 PE=2 SV=2	0	0	0	0	0	0	49786000	0	16101000	0	0	0	223400000	88192000	128150000	0		0	1.09812e+07	155796000	64075000		#DIV/0!	5.83499		0	0	0	0	0	0	0	1	0	1	0	0	1	1	1	0
Q99439;Q15417	Calponin-2	CNN2	sp|Q99439|CNN2_HUMAN Calponin-2 OS=Homo sapiens OX=9606 GN=CNN2 PE=1 SV=4;sp|Q15417|CNN3_HUMAN Calponin-3 OS=Homo sapiens OX=9606 GN=CNN3 PE=1 SV=1	0	0	0	0	0	0	0	0	0	0	0	0	107400000	0	4455500	0		0	0	53700000	2227750		#DIV/0!	#DIV/0!		0	0	0	0	0	0	0	0	0	0	0	0	1	1	0	0
Q86V48	Leucine zipper protein 1	LUZP1	sp|Q86V48|LUZP1_HUMAN Leucine zipper protein 1 OS=Homo sapiens OX=9606 GN=LUZP1 PE=1 SV=2	0	0	0	0	0	0	0	0	0	0	11428000	0	74794000	12313000	26916000	0		0	1.90467e+06	43553500	13458000		#DIV/0!	7.0658		0	0	0	0	0	0	0	1	0	0	1	0	8	5	1	0
P68371;P04350	Tubulin beta-4B chain	TUBB4B	sp|P68371|TBB4B_HUMAN Tubulin beta-4B chain OS=Homo sapiens OX=9606 GN=TUBB4B PE=1 SV=1;sp|P04350|TBB4A_HUMAN Tubulin beta-4A chain OS=Homo sapiens OX=9606 GN=TUBB4A PE=1 SV=2	0	0	0	0	0	0	6180300	0	0	0	0	0	64446000	14977000	30667000	0		0	1030050	39711500	15333500		#DIV/0!	14.8862		1	2	5	3	6	1	1	3	7	6	4	2	10	3	7	4
Q7RTW8	Otoancorin	OTOA	sp|Q7RTW8|OTOAN_HUMAN Otoancorin OS=Homo sapiens OX=9606 GN=OTOA PE=1 SV=1	0	0	0	0	0	0	0	0	0	0	0	0	0	76419000	0	0		0	0	38209500	0		#DIV/0!	#DIV/0!		0	0	0	0	0	0	0	0	0	0	0	0	0	0	1	0
Q02543	60S ribosomal protein L18a	RPL18A	sp|Q02543|RL18A_HUMAN 60S ribosomal protein L18a OS=Homo sapiens OX=9606 GN=RPL18A PE=1 SV=2	0	0	0	0	0	0	0	0	0	0	0	0	54540000	0	0	0		0	0	27270000	0		#DIV/0!	#DIV/0!		0	0	0	0	0	0	0	1	0	0	0	1	2	0	0	0
P06312	Ig kappa chain V-IV region	IGKV4-1	sp|P06312|KV401_HUMAN Immunoglobulin kappa variable 4-1 OS=Homo sapiens OX=9606 GN=IGKV4-1 PE=1 SV=1	0	0	0	0	0	0	0	0	16121000	0	0	0	37567000	0	0	0		0	2.68683e+06	18783500	0		#DIV/0!	0		0	0	0	0	0	0	0	0	0	1	0	0	1	0	0	0
P33778;Q99880;Q93079;Q99877;Q16778;P62807;P58876;O60814;Q5QNW6;P23527;Q99879;P57053;P06899;Q8N257;Q96A08	Histone H2B type 1-B	HIST1H2BB	sp|P33778|H2B1B_HUMAN Histone H2B type 1-B OS=Homo sapiens OX=9606 GN=HIST1H2BB PE=1 SV=2;sp|Q99880|H2B1L_HUMAN Histone H2B type 1-L OS=Homo sapiens OX=9606 GN=HIST1H2BL PE=1 SV=3;sp|Q93079|H2B1H_HUMAN Histone H2B type 1-H OS=Homo sapiens OX=9606 GN=HIST1H	0	0	0	0	0	0	33406000	14697000	3508400	0	0	0	28684000	0	3334900	0		0	8601900	14342000	1667450		#DIV/0!	0.193847		0	0	0	1	1	0	2	4	2	2	1	0	4	1	1	1
P18621	60S ribosomal protein L17	RPL17	sp|P18621|RL17_HUMAN 60S ribosomal protein L17 OS=Homo sapiens OX=9606 GN=RPL17 PE=1 SV=3	0	0	0	0	0	0	0	0	0	0	0	0	23935000	3436100	0	0		0	0	13685550	0		#DIV/0!	#DIV/0!		0	0	0	0	0	0	0	0	1	0	0	0	1	0	1	0
Q9H0L4	Cleavage stimulation factor subunit 2 tau variant	CSTF2T	sp|Q9H0L4|CSTFT_HUMAN Cleavage stimulation factor subunit 2 tau variant OS=Homo sapiens OX=9606 GN=CSTF2T PE=1 SV=1	0	0	0	0	0	0	4797400	0	3696200	0	0	0	18812000	0	20112000	0		0	1415600	9406000	10056000		#DIV/0!	7.1037		0	0	0	0	0	0	0	1	0	1	0	0	3	2	1	1
P60953	Cell division control protein 42 homolog	CDC42	sp|P60953|CDC42_HUMAN Cell division control protein 42 homolog OS=Homo sapiens OX=9606 GN=CDC42 PE=1 SV=2	0	0	0	0	0	0	2699300	0	0	0	0	0	14427000	0	9691600	0		0	449883	7213500	4845800		#DIV/0!	10.7712		0	0	0	0	0	0	0	1	0	0	0	0	1	1	0	0
Q13509	Tubulin beta-3 chain	TUBB3	sp|Q13509|TBB3_HUMAN Tubulin beta-3 chain OS=Homo sapiens OX=9606 GN=TUBB3 PE=1 SV=2	0	0	0	0	0	0	0	0	0	0	0	0	11508000	0	0	0		0	0	5754000	0		#DIV/0!	#DIV/0!		0	1	4	1	4	0	0	1	5	4	2	1	7	1	5	3
Q12996	Cleavage stimulation factor subunit 3	CSTF3	sp|Q12996|CSTF3_HUMAN Cleavage stimulation factor subunit 3 OS=Homo sapiens OX=9606 GN=CSTF3 PE=1 SV=1	0	0	0	0	0	0	0	0	0	0	0	0	10039000	0	55081000	0		0	0	5019500	27540500		#DIV/0!	#DIV/0!		0	1	0	1	0	0	0	0	0	0	0	0	3	3	1	0
P62888	60S ribosomal protein L30	RPL30	sp|P62888|RL30_HUMAN 60S ribosomal protein L30 OS=Homo sapiens OX=9606 GN=RPL30 PE=1 SV=2	0	0	0	0	0	0	0	0	0	0	0	0	7531000	0	0	0		0	0	3765500	0		#DIV/0!	#DIV/0!		0	0	0	0	0	0	0	0	0	0	0	0	1	0	0	0
Q9GZP1	Neurensin-2	NRSN2	sp|Q9GZP1|NRSN2_HUMAN Neurensin-2 OS=Homo sapiens OX=9606 GN=NRSN2 PE=2 SV=1	0	0	0	0	0	0	0	0	0	0	0	0	0	7303700	0	0		0	0	3651850	0		#DIV/0!	#DIV/0!		0	0	0	0	0	0	0	0	0	0	0	0	0	0	1	0
P62899	60S ribosomal protein L31	RPL31	sp|P62899|RL31_HUMAN 60S ribosomal protein L31 OS=Homo sapiens OX=9606 GN=RPL31 PE=1 SV=1	0	0	0	0	0	0	0	0	0	0	0	0	6658700	0	0	0		0	0	3329350	0		#DIV/0!	#DIV/0!		0	0	1	0	0	0	0	0	0	0	0	0	1	0	0	0
P35232	Prohibitin	PHB	sp|P35232|PHB_HUMAN Prohibitin OS=Homo sapiens OX=9606 GN=PHB PE=1 SV=1	0	0	0	0	0	0	0	0	13427000	0	0	0	0	6017100	37661000	23516000		0	2.23783e+06	3008550	30588500		#DIV/0!	13.6688		0	0	0	1	0	0	0	0	0	1	0	0	0	1	1	2
P18858	DNA ligase 1	LIG1	sp|P18858|DNLI1_HUMAN DNA ligase 1 OS=Homo sapiens OX=9606 GN=LIG1 PE=1 SV=1	0	0	0	0	0	0	0	0	0	0	0	0	5138800	0	9340000	0		0	0	2569400	4670000		#DIV/0!	#DIV/0!		0	0	0	0	0	0	0	0	0	0	0	0	1	1	0	0
P60866	40S ribosomal protein S20	RPS20	sp|P60866|RS20_HUMAN 40S ribosomal protein S20 OS=Homo sapiens OX=9606 GN=RPS20 PE=1 SV=1	0	0	0	0	0	0	0	0	0	0	0	0	4359000	0	0	0		0	0	2179500	0		#DIV/0!	#DIV/0!		0	0	1	0	0	0	0	0	1	0	0	0	1	0	0	0
P51991	Heterogeneous nuclear ribonucleoprotein A3	HNRNPA3	sp|P51991|ROA3_HUMAN Heterogeneous nuclear ribonucleoprotein A3 OS=Homo sapiens OX=9606 GN=HNRNPA3 PE=1 SV=2	0	0	0	0	0	0	0	0	0	0	0	0	4137400	0	3059000	0		0	0	2068700	1529500		#DIV/0!	#DIV/0!		0	0	0	0	0	0	0	0	0	0	0	0	1	2	0	0
Q15007	Pre-mRNA-splicing regulator WTAP	WTAP	sp|Q15007|FL2D_HUMAN Pre-mRNA-splicing regulator WTAP OS=Homo sapiens OX=9606 GN=WTAP PE=1 SV=2	0	0	0	0	0	0	0	0	0	0	0	0	3629800	0	10688000	0		0	0	1814900	5344000		#DIV/0!	#DIV/0!		0	0	0	0	0	0	0	0	0	0	0	0	1	2	1	0
Q9Y3U8	60S ribosomal protein L36	RPL36	sp|Q9Y3U8|RL36_HUMAN 60S ribosomal protein L36 OS=Homo sapiens OX=9606 GN=RPL36 PE=1 SV=3	0	0	0	0	0	0	0	0	0	0	0	0	3016200	0	0	0		0	0	1508100	0		#DIV/0!	#DIV/0!		0	0	0	0	0	0	0	0	0	0	0	0	1	0	0	0
P33176	Kinesin-1 heavy chain	KIF5B	sp|P33176|KINH_HUMAN Kinesin-1 heavy chain OS=Homo sapiens OX=9606 GN=KIF5B PE=1 SV=1	0	0	0	0	0	0	0	0	0	0	0	0	0	2965700	0	0		0	0	1482850	0		#DIV/0!	#DIV/0!		0	0	1	0	0	0	0	0	0	0	0	0	1	0	1	1
Q8NFJ5	Retinoic acid-induced protein 3	GPRC5A	sp|Q8NFJ5|RAI3_HUMAN Retinoic acid-induced protein 3 OS=Homo sapiens OX=9606 GN=GPRC5A PE=1 SV=2	0	0	0	0	0	0	0	0	0	0	0	0	0	510120	0	0		0	0	255060	0		#DIV/0!	#DIV/0!		0	0	0	0	0	0	0	0	0	0	0	0	1	0	1	0
P15814;A0M8Q6;P0CF74	Immunoglobulin lambda-like polypeptide 1	IGLL1	sp|P15814|IGLL1_HUMAN Immunoglobulin lambda-like polypeptide 1 OS=Homo sapiens OX=9606 GN=IGLL1 PE=1 SV=1;sp|A0M8Q6|IGLC7_HUMAN Immunoglobulin lambda constant 7 OS=Homo sapiens OX=9606 GN=IGLC7 PE=1 SV=3;sp|P0CF74|IGLC6_HUMAN Immunoglobulin lambda constant	0	0	0	84846	0	0	70845000	0	0	0	0	0	34098000	65057000	33424000	72246000		14141	11807500	49577500	52835000		3505.94	4.4747		0	0	0	1	0	0	0	1	0	0	0	0	1	1	1	1
P13051	Uracil-DNA glycosylase	UNG	sp|P13051|UNG_HUMAN Uracil-DNA glycosylase OS=Homo sapiens OX=9606 GN=UNG PE=1 SV=2	13905000	2454800	24132000	0	0	0	39726000	0	6425700	0	24452000	0	1855300000	3926900000	5276700000	5027400000		6.74863e+06	1.17673e+07	2891100000	5152050000		428.398	437.828		1	1	1	0	0	1	1	2	0	2	1	0	15	15	16	16
P11586	C-1-tetrahydrofolate synthase, cytoplasmic	MTHFD1	sp|P11586|C1TC_HUMAN C-1-tetrahydrofolate synthase, cytoplasmic OS=Homo sapiens OX=9606 GN=MTHFD1 PE=1 SV=3	0	0	12582000	0	0	0	0	0	0	0	0	0	139820000	0	0	0		2097000	0	69910000	0		33.3381	#DIV/0!		0	0	2	0	0	0	0	0	0	0	0	0	1	0	0	0
P0C0L4;P0C0L5	Complement C4-A	C4A	sp|P0C0L4|CO4A_HUMAN Complement C4-A OS=Homo sapiens OX=9606 GN=C4A PE=1 SV=2;sp|P0C0L5|CO4B_HUMAN Complement C4-B OS=Homo sapiens OX=9606 GN=C4B PE=1 SV=2	0	26431000	0	0	1279100	0	81634000	0	19574000	1279100	0	0	86914000	102300000	139480000	0		4618350	1.70812e+07	94607000	69740000		20.485	4.08286		0	2	0	0	1	0	0	1	0	1	0	0	3	2	1	0
O43852	Calumenin	CALU	sp|O43852|CALU_HUMAN Calumenin OS=Homo sapiens OX=9606 GN=CALU PE=1 SV=2	1432700	0	0	0	0	0	8789700	0	0	0	0	0	7361300	0	0	0		238783	1464950	3680650	0		15.4142	0		1	0	1	0	0	0	0	2	0	0	0	0	1	0	0	0
Q9UJZ1	Stomatin-like protein 2, mitochondrial	STOML2	sp|Q9UJZ1|STML2_HUMAN Stomatin-like protein 2, mitochondrial OS=Homo sapiens OX=9606 GN=STOML2 PE=1 SV=1	0	128860000	0	49789000	0	389950	95399000	0	27280000	0	0	0	362230000	511740000	1374700000	441440000		29839825	20446500	436985000	908070000		14.6444	44.412		0	5	1	4	0	1	0	5	0	4	0	0	9	8	9	7
P12018	Immunoglobulin iota chain	VPREB1	sp|P12018|VPREB_HUMAN Immunoglobulin iota chain OS=Homo sapiens OX=9606 GN=VPREB1 PE=1 SV=2	0	0	0	8538800	0	0	42937000	0	0	0	0	0	0	33300000	164980000	0		1.42313e+06	7.15617e+06	16650000	82490000		11.6995	11.5271		0	0	0	1	0	0	0	1	0	0	0	0	1	1	1	0
Q08945	FACT complex subunit SSRP1	SSRP1	sp|Q08945|SSRP1_HUMAN FACT complex subunit SSRP1 OS=Homo sapiens OX=9606 GN=SSRP1 PE=1 SV=1	1681200	0	0	0	0	0	0	0	0	0	0	0	6421200	0	0	0		280200	0	3210600	0		11.4582	#DIV/0!		1	0	0	0	0	0	1	0	0	0	0	0	1	0	0	0
P14923	Junction plakoglobin	JUP	sp|P14923|PLAK_HUMAN Junction plakoglobin OS=Homo sapiens OX=9606 GN=JUP PE=1 SV=3	0	0	1085100	0	0	0	0	0	0	0	0	0	3575100	554810	0	0		180850	0	2064955	0		11.4181	#DIV/0!		0	0	1	0	0	0	0	0	0	0	0	0	2	0	1	0
P46940	Ras GTPase-activating-like protein IQGAP1	IQGAP1	sp|P46940|IQGA1_HUMAN Ras GTPase-activating-like protein IQGAP1 OS=Homo sapiens OX=9606 GN=IQGAP1 PE=1 SV=1	0	41073000	0	43262000	0	0	69302000	0	10602000	0	0	10878000	275920000	23931000	342720000	215540000		1.40558e+07	1.51303e+07	149925500	279130000		10.6664	18.4484		0	3	0	3	0	0	1	6	0	3	0	2	17	15	3	3
Q99959	Plakophilin-2	PKP2	sp|Q99959|PKP2_HUMAN Plakophilin-2 OS=Homo sapiens OX=9606 GN=PKP2 PE=1 SV=2	0	0	0	1235500	0	0	0	0	0	0	0	0	4261000	0	0	0		205917	0	2130500	0		10.3464	#DIV/0!		0	0	0	1	1	0	0	0	0	0	0	0	4	0	0	0
P60660	Myosin light polypeptide 6	MYL6	sp|P60660|MYL6_HUMAN Myosin light polypeptide 6 OS=Homo sapiens OX=9606 GN=MYL6 PE=1 SV=2	0	48359000	4973100	0	16836000	0	13574000	0	24431000	16836000	4360500	0	140630000	87242000	17681000	103030000		1.16947e+07	9.86692e+06	113936000	60355500		9.74255	6.11696		0	2	1	0	1	0	1	1	1	2	1	0	4	3	2	3
Q86V81	THO complex subunit 4	ALYREF	sp|Q86V81|THOC4_HUMAN THO complex subunit 4 OS=Homo sapiens OX=9606 GN=ALYREF PE=1 SV=3	0	138390000	0	38398000	0	0	31873000	0	79022000	0	0	0	287740000	117890000	240790000	154940000		2.94647e+07	18482500	202815000	197865000		6.88333	10.7055		0	5	0	2	0	0	0	3	0	4	0	0	7	4	4	4
Q15149	Plectin	PLEC	sp|Q15149|PLEC_HUMAN Plectin OS=Homo sapiens OX=9606 GN=PLEC PE=1 SV=3	0	0	105400000	253560	293970000	27020000	45367000	50213000	3025100	293970000	0	40204000	861070000	85998000	5130300	0		71107260	72129850	473534000	2565150		6.65943	0.0355629		0	0	7	1	9	8	0	9	3	2	0	1	51	1	6	0
Q96C36	Pyrroline-5-carboxylate reductase 2	PYCR2	sp|Q96C36|P5CR2_HUMAN Pyrroline-5-carboxylate reductase 2 OS=Homo sapiens OX=9606 GN=PYCR2 PE=1 SV=1	0	8785100	0	0	0	0	11758000	0	0	0	0	0	18896000	0	68888000	9755100		1.46418e+06	1.95967e+06	9448000	39321550		6.45274	20.0654		0	2	0	1	0	0	0	1	0	0	0	0	4	3	1	3
Q07889	Son of sevenless homolog 1	SOS1	sp|Q07889|SOS1_HUMAN Son of sevenless homolog 1 OS=Homo sapiens OX=9606 GN=SOS1 PE=1 SV=1	14313000	11397000	0	0	0	0	0	0	0	0	39908000	0	23177000	28703000	0	0		4285000	6.65133e+06	25940000	0		6.05368	0		1	1	0	0	1	0	1	0	0	0	1	0	1	0	1	0
P25398	40S ribosomal protein S12	RPS12	sp|P25398|RS12_HUMAN 40S ribosomal protein S12 OS=Homo sapiens OX=9606 GN=RPS12 PE=1 SV=3	0	0	7711600	0	0	0	0	9424200	0	0	0	0	14777000	0	11011000	0		1.28527e+06	1570700	7388500	5505500		5.74861	3.50513		0	0	1	0	0	0	0	0	1	0	0	0	1	1	0	0
O60437	Periplakin	PPL	sp|O60437|PEPL_HUMAN Periplakin OS=Homo sapiens OX=9606 GN=PPL PE=1 SV=4	0	0	0	7478400	0	0	7117000	0	910400	0	0	0	5006700	8129800	10354000	9051600		1246400	1337900	6568250	9702800		5.26978	7.25226		0	0	0	1	0	0	0	1	0	1	0	0	1	1	1	1
P01834;P0DOX7	Ig kappa chain C region	IGKC	sp|P01834|IGKC_HUMAN Immunoglobulin kappa constant OS=Homo sapiens OX=9606 GN=IGKC PE=1 SV=2;sp|P0DOX7|IGK_HUMAN Immunoglobulin kappa light chain OS=Homo sapiens OX=9606 PE=1 SV=1	0	0	7686300	0	0	0	0	3253800	3273100	0	0	49004000	12618000	0	0	0		1281050	9255150	6309000	0		4.92487	0		0	1	1	1	1	1	1	1	1	2	1	1	1	1	0	0
Q86W92	Liprin-beta-1	PPFIBP1	sp|Q86W92|LIPB1_HUMAN Liprin-beta-1 OS=Homo sapiens OX=9606 GN=PPFIBP1 PE=1 SV=2	0	176020000	16779000	94234000	0	0	44519000	0	26770000	0	0	3884800	221620000	209670000	813420000	225130000		4.78388e+07	1.2529e+07	215645000	519275000		4.50774	41.446		0	9	1	3	0	0	0	4	0	3	0	1	15	14	6	6
O43175	D-3-phosphoglycerate dehydrogenase	PHGDH	sp|O43175|SERA_HUMAN D-3-phosphoglycerate dehydrogenase OS=Homo sapiens OX=9606 GN=PHGDH PE=1 SV=4	0	364440000	6433700	490050000	0	0	195900000	11283000	228070000	0	0	0	780440000	466470000	1795800000	568270000		1.43487e+08	7.25422e+07	623455000	1182035000		4.34502	16.2945		0	6	2	8	0	0	1	6	1	8	0	0	11	12	10	8
P02545	Prelamin-A/C	LMNA	sp|P02545|LMNA_HUMAN Prelamin-A/C OS=Homo sapiens OX=9606 GN=LMNA PE=1 SV=1	1873100	4767100	102850000	34486000	3491700	0	52435000	0	0	3491700	0	9436300	186510000	8225100	789050000	22672000		2.4578e+07	1.08938e+07	97367550	405861000		3.96158	37.256		1	1	7	4	1	0	0	5	0	0	0	2	12	14	3	2
Q8IXT5	RNA-binding protein 12B	RBM12B	sp|Q8IXT5|RB12B_HUMAN RNA-binding protein 12B OS=Homo sapiens OX=9606 GN=RBM12B PE=1 SV=2	0	8267800	0	81434000	0	659800	27537000	0	0	0	0	0	40877000	68471000	119950000	149120000		1.50603e+07	4589500	54674000	134535000		3.63035	29.3137		0	2	0	2	0	1	0	2	0	1	0	0	7	2	2	3
Q6UWX4	HHIP-like protein 2	HHIPL2	sp|Q6UWX4|HIPL2_HUMAN HHIP-like protein 2 OS=Homo sapiens OX=9606 GN=HHIPL2 PE=1 SV=1	0	330310000	0	320130000	0	0	256170000	0	229910000	0	0	0	296540000	406800000	418350000	567670000		1.08407e+08	8.10133e+07	351670000	493010000		3.24399	6.08554		0	1	0	1	0	0	0	1	0	1	0	0	1	1	1	1
P67809	Nuclease-sensitive element-binding protein 1	YBX1	sp|P67809|YBOX1_HUMAN Nuclease-sensitive element-binding protein 1 OS=Homo sapiens OX=9606 GN=YBX1 PE=1 SV=3	0	2346100	5546200	0	12561000	0	0	38809000	5814600	12561000	0	0	21487000	0	12361000	0		3.40888e+06	9.53077e+06	10743500	6180500		3.15162	0.648479		1	1	3	0	1	0	1	1	2	1	0	0	2	2	1	1
P39023	60S ribosomal protein L3	RPL3	sp|P39023|RL3_HUMAN 60S ribosomal protein L3 OS=Homo sapiens OX=9606 GN=RPL3 PE=1 SV=2	0	0	22655000	0	15012000	0	0	1487400	1530500	15012000	0	1237900	37014000	1800200	0	0		6.27783e+06	3211300	19407100	0		3.09137	0		0	0	1	0	1	0	0	0	1	1	0	1	2	0	1	0
P0DOX2;A0A0J9YX35;A0A0A0MS15;A0A0B4J1V0;A0A0B4J1V6;A0A0B4J1Y9;A0A075B6Q5;P0DP04;A0A0B4J1X8;A0A0C4DH32;P0DP03;A0A0B4J1X5;A0A0B4J1V1;P0DP02;A0A0C4DH42;P01763;P01766;P01764;P01768;P01772;P01780;P01782;P01762;P01767	Ig heavy chain V-III region WEA	IGHV3-49	sp|P0DOX2|IGA2_HUMAN Immunoglobulin alpha-2 heavy chain OS=Homo sapiens OX=9606 PE=1 SV=2;sp|A0A0J9YX35|HV64D_HUMAN Immunoglobulin heavy variable 3-64D OS=Homo sapiens OX=9606 GN=IGHV3-64D PE=3 SV=1;sp|A0A0A0MS15|HV349_HUMAN Immunoglobulin heavy variable 3	0	371860000	0	341150000	0	0	81315000	0	147140000	0	0	0	176520000	557240000	255560000	225080000		118835000	3.80758e+07	366880000	240320000		3.08731	6.31161		0	1	0	1	0	0	0	1	0	1	0	0	1	1	1	1
Q99623	Prohibitin-2	PHB2	sp|Q99623|PHB2_HUMAN Prohibitin-2 OS=Homo sapiens OX=9606 GN=PHB2 PE=1 SV=2	1438000	150110	0	2588400	0	0	7307000	1683200	0	0	0	0	382860	3768600	102990000	0		696085	1.49837e+06	2075730	51495000		2.98201	34.3674		1	1	0	1	0	0	0	1	1	0	0	0	2	2	1	0
P15924	Desmoplakin	DSP	sp|P15924|DESP_HUMAN Desmoplakin OS=Homo sapiens OX=9606 GN=DSP PE=1 SV=3	8945700	0	0	0	0	15331000	0	0	87287	0	0	17490000	22598000	0	1249900	0		4.04612e+06	2.92955e+06	11299000	624950		2.79255	0.213326		1	0	0	0	0	3	0	0	0	1	0	1	5	1	0	0
P05783	Keratin, type I cytoskeletal 18	KRT18	sp|P05783|K1C18_HUMAN Keratin, type I cytoskeletal 18 OS=Homo sapiens OX=9606 GN=KRT18 PE=1 SV=2	97923000	61538000	1447800000	95789000	6547700000	295390000	2655200000	461350000	347790000	6547700000	309170000	349110000	4904800000	2718100000	783990000	4405600		1.42436e+09	1.77839e+09	3811450000	394197800		2.67591	0.22166		9	11	18	12	20	17	20	25	19	19	9	11	29	15	25	4
P62266	40S ribosomal protein S23	RPS23	sp|P62266|RS23_HUMAN 40S ribosomal protein S23 OS=Homo sapiens OX=9606 GN=RPS23 PE=1 SV=3	0	0	4877400	0	0	0	0	0	0	0	0	0	4284900	0	0	0		812900	0	2142450	0		2.63556	#DIV/0!		0	0	1	0	0	0	0	0	0	0	0	0	1	0	0	0
P43243	Matrin-3	MATR3	sp|P43243|MATR3_HUMAN Matrin-3 OS=Homo sapiens OX=9606 GN=MATR3 PE=1 SV=2	0	18036000	0	0	0	0	14901000	0	18088000	0	0	0	15092000	0	16031000	0		3006000	5.49817e+06	7546000	8015500		2.51031	1.45785		0	1	0	0	0	0	0	2	0	1	0	0	3	4	1	0
P26373	60S ribosomal protein L13	RPL13	sp|P26373|RL13_HUMAN 60S ribosomal protein L13 OS=Homo sapiens OX=9606 GN=RPL13 PE=1 SV=4	15269000	0	31420000	4031300	0	468580	26048000	27991000	9815300	0	0	57189000	42662000	0	46189000	2414700		8531480	2.01739e+07	21331000	24301850		2.50027	1.20462		1	0	1	1	0	1	0	2	4	2	0	2	3	1	0	1
P83731	60S ribosomal protein L24	RPL24	sp|P83731|RL24_HUMAN 60S ribosomal protein L24 OS=Homo sapiens OX=9606 GN=RPL24 PE=1 SV=1	0	0	5345000	0	0	0	0	4541100	0	0	0	0	4151200	0	0	0		890833	756850	2075600	0		2.32995	0		0	0	1	0	0	0	0	0	1	0	0	0	2	0	0	0
P22061	Protein-L-isoaspartate(D-aspartate) O-methyltransferase	PCMT1	sp|P22061|PIMT_HUMAN Protein-L-isoaspartate(D-aspartate) O-methyltransferase OS=Homo sapiens OX=9606 GN=PCMT1 PE=1 SV=4	13243000	0	9547700	0	0	0	8572200	6904300	6945900	0	0	0	17371000	0	26264000	0		3798450	3.73707e+06	8685500	13132000		2.28659	3.51399		1	0	1	0	0	0	0	1	1	1	0	0	2	2	0	0
O00299	Chloride intracellular channel protein 1	CLIC1	sp|O00299|CLIC1_HUMAN Chloride intracellular channel protein 1 OS=Homo sapiens OX=9606 GN=CLIC1 PE=1 SV=4	0	0	6584300	0	966570	0	0	0	0	966570	2254400	0	5309000	0	0	0		1.25848e+06	536828	2654500	0		2.10929	0		0	0	1	0	1	0	1	0	0	0	1	0	1	0	0	0
Q8NHH1	Tubulin polyglutamylase TTLL11	TTLL11	sp|Q8NHH1|TTL11_HUMAN Tubulin polyglutamylase TTLL11 OS=Homo sapiens OX=9606 GN=TTLL11 PE=1 SV=2	211770000	13680000	97015000	93504	0	201600000	60912000	134020000	24411000	0	301120000	96880000	102250000	261340000	0	63450000		8.73598e+07	102890500	181795000	31725000		2.08099	0.308338		1	1	1	1	0	1	1	1	1	1	1	1	1	0	1	1

## Sheet: Sorted >2 fold flox
Majority protein IDs	Protein names	Gene names	Fasta headers	Intensity UNGKO Clone 1_DMSO_IGG	Intensity UNGKO Clone 1_DMSO_UNG	Intensity UNGKO Clone 2_DMSO_IGG	Intensity UNGKO Clone 2_DMSO_UNG	Intensity UNG Clone 1_DMSO_IGG	Intensity UNG Clone 2_DMSO_IGG	Intensity UNGKO Clone 1_FLOX_UNG	Intensity UNGKO Clone 2_FLOX_IGG	Intensity UNGKO Clone 2_FLOX_UNG	Intensity UNG Clone 1_DMSO_IGG	Intensity UNG Clone 1_FLOX_IGG	Intensity UNG Clone 2_FLOX_IGG	Intensity UNG Clone 1_DMSO_UNG	Intensity UNG Clone 2_DMSO_UNG	Intensity UNG Clone 1_FLOX_UNG	Intensity UNG Clone 2_FLOX_UNG		Intensity: Average Controls DMSO	Intensity: Average Controls Flox	Intensity: Average UNG DMSO	Intensity: Average UNG Flox		Fold Change Intensity DMSO	Fold Change Intensity Flox		Peptides UNGKO Clone 1_DMSO_IGG	Peptides UNGKO Clone 1_DMSO_UNG	Peptides UNGKO Clone 2_DMSO_IGG	Peptides UNGKO Clone 2_DMSO_UNG	Peptides UNG Clone 1_DMSO_IGG	Peptides UNG Clone 2_DMSO_IGG	Peptides UNGKO Clone 1_FLOX_IGG	Peptides UNGKO Clone 1_FLOX_UNG	Peptides UNGKO Clone 2_FLOX_IGG	Peptides UNGKO Clone 2_FLOX_UNG	Peptides UNG Clone 1_FLOX_IGG	Peptides UNG Clone 2_FLOX_IGG	Peptides UNG Clone 1_DMSO_UNG	Peptides UNG Clone 1_FLOX_UNG	Peptides UNG Clone 2_DMSO_UNG	Peptides UNG Clone 2_FLOX_UNG
Q86VV8	Rotatin	RTTN	sp|Q86VV8|RTTN_HUMAN Rotatin OS=Homo sapiens OX=9606 GN=RTTN PE=1 SV=3	0	0	9361200	0	0	0	0	0	0	0	0	0	0	0	418160	0		1560200	0	0	209080		0	#DIV/0!		0	0	1	0	0	0	0	0	0	0	0	0	0	1	0	0
P00367;P49448	Glutamate dehydrogenase 1, mitochondrial	GLUD1	sp|P00367|DHE3_HUMAN Glutamate dehydrogenase 1, mitochondrial OS=Homo sapiens OX=9606 GN=GLUD1 PE=1 SV=2;sp|P49448|DHE4_HUMAN Glutamate dehydrogenase 2, mitochondrial OS=Homo sapiens OX=9606 GN=GLUD2 PE=1 SV=2	0	0	44189000	0	0	0	0	0	0	0	0	0	0	0	0	685900		7.36483e+06	0	0	342950		0	#DIV/0!		0	0	1	0	0	0	0	0	0	0	0	0	0	0	0	1
Q9UHV9	Prefoldin subunit 2	PFDN2	sp|Q9UHV9|PFD2_HUMAN Prefoldin subunit 2 OS=Homo sapiens OX=9606 GN=PFDN2 PE=1 SV=1	0	0	24287000	0	0	0	0	0	0	0	0	0	0	0	0	1328200		4.04783e+06	0	0	664100		0	#DIV/0!		0	0	1	0	0	0	0	0	0	0	0	0	0	0	0	1
Q9BZK7	F-box-like/WD repeat-containing protein TBL1XR1	TBL1XR1	sp|Q9BZK7|TBL1R_HUMAN F-box-like/WD repeat-containing protein TBL1XR1 OS=Homo sapiens OX=9606 GN=TBL1XR1 PE=1 SV=1	0	0	0	0	0	0	0	0	0	0	0	0	0	0	1475200	0		0	0	0	737600		#DIV/0!	#DIV/0!		0	0	0	0	0	0	0	0	0	0	0	0	0	1	0	0
Q9NWH9	SAFB-like transcription modulator	SLTM	sp|Q9NWH9|SLTM_HUMAN SAFB-like transcription modulator OS=Homo sapiens OX=9606 GN=SLTM PE=1 SV=2	0	0	0	0	0	0	0	0	0	0	0	0	0	0	0	1696600		0	0	0	848300		#DIV/0!	#DIV/0!		0	0	0	0	0	0	0	0	0	0	0	0	0	0	0	1
P54136	Arginine--tRNA ligase, cytoplasmic	RARS	sp|P54136|SYRC_HUMAN Arginine--tRNA ligase, cytoplasmic OS=Homo sapiens OX=9606 GN=RARS PE=1 SV=2	0	0	0	0	0	0	0	0	0	0	0	0	0	0	2902300	0		0	0	0	1451150		#DIV/0!	#DIV/0!		0	0	0	0	0	0	0	0	0	0	0	0	0	1	0	0
P51991	Heterogeneous nuclear ribonucleoprotein A3	HNRNPA3	sp|P51991|ROA3_HUMAN Heterogeneous nuclear ribonucleoprotein A3 OS=Homo sapiens OX=9606 GN=HNRNPA3 PE=1 SV=2	0	0	0	0	0	0	0	0	0	0	0	0	4137400	0	3059000	0		0	0	2068700	1529500		#DIV/0!	#DIV/0!		0	0	0	0	0	0	0	0	0	0	0	0	1	2	0	0
Q13480	GRB2-associated-binding protein 1	GAB1	sp|Q13480|GAB1_HUMAN GRB2-associated-binding protein 1 OS=Homo sapiens OX=9606 GN=GAB1 PE=1 SV=2	0	0	0	0	0	0	0	0	0	0	0	0	0	0	3212300	0		0	0	0	1606150		#DIV/0!	#DIV/0!		0	0	0	0	0	0	0	0	0	0	0	0	0	1	0	0
P20700	Lamin-B1	LMNB1	sp|P20700|LMNB1_HUMAN Lamin-B1 OS=Homo sapiens OX=9606 GN=LMNB1 PE=1 SV=2	0	0	9047000	0	0	0	0	0	0	0	0	0	0	0	4278200	0		1.50783e+06	0	0	2139100		0	#DIV/0!		0	0	1	0	0	0	0	0	0	0	0	0	1	1	0	0
P31946	14-3-3 protein beta/alpha	YWHAB	sp|P31946|1433B_HUMAN 14-3-3 protein beta/alpha OS=Homo sapiens OX=9606 GN=YWHAB PE=1 SV=3	0	0	18861000	0	0	0	0	0	0	0	0	0	0	0	4321100	0		3143500	0	0	2160550		0	#DIV/0!		0	1	2	0	0	0	0	0	0	1	0	0	1	1	0	0
P09661	U2 small nuclear ribonucleoprotein A	SNRPA1	sp|P09661|RU2A_HUMAN U2 small nuclear ribonucleoprotein A OS=Homo sapiens OX=9606 GN=SNRPA1 PE=1 SV=2	0	0	0	0	0	0	0	0	0	0	0	0	0	0	4452900	0		0	0	0	2226450		#DIV/0!	#DIV/0!		0	0	0	0	0	0	0	0	0	0	0	0	0	1	0	0
Q99439;Q15417	Calponin-2	CNN2	sp|Q99439|CNN2_HUMAN Calponin-2 OS=Homo sapiens OX=9606 GN=CNN2 PE=1 SV=4;sp|Q15417|CNN3_HUMAN Calponin-3 OS=Homo sapiens OX=9606 GN=CNN3 PE=1 SV=1	0	0	0	0	0	0	0	0	0	0	0	0	107400000	0	4455500	0		0	0	53700000	2227750		#DIV/0!	#DIV/0!		0	0	0	0	0	0	0	0	0	0	0	0	1	1	0	0
B9UYK7;C1IWT2;C5IY46;Q3YPH4			sp|B9UYK7|CAPSD_HBOC2 Minor capsid protein VP1 OS=Human bocavirus 2 OX=573977 GN=VP1 PE=3 SV=1;sp|C1IWT2|CAPSD_HBOC3 Minor capsid protein VP1 OS=Human bocavirus 3 OX=638313 GN=VP1 PE=1 SV=1;sp|C5IY46|CAPSD_HBOC4 Minor capsid protein VP1 OS=Human bocavirus	0	989940	0	0	0	0	0	0	0	0	0	0	0	0	0	5093000		164990	0	0	2546500		0	#DIV/0!		0	1	0	0	0	0	0	1	0	1	1	1	1	0	1	1
O14497;Q8NFD5	AT-rich interactive domain-containing protein 1A	ARID1A	sp|O14497|ARI1A_HUMAN AT-rich interactive domain-containing protein 1A OS=Homo sapiens OX=9606 GN=ARID1A PE=1 SV=3;sp|Q8NFD5|ARI1B_HUMAN AT-rich interactive domain-containing protein 1B OS=Homo sapiens OX=9606 GN=ARID1B PE=1 SV=2	0	1293000	0	0	0	0	0	0	0	0	0	0	0	0	0	7008400		215500	0	0	3504200		0	#DIV/0!		0	1	0	0	0	0	0	0	0	0	0	0	1	0	0	1
P15531	Nucleoside diphosphate kinase A	NME1	sp|P15531|NDKA_HUMAN Nucleoside diphosphate kinase A OS=Homo sapiens OX=9606 GN=NME1 PE=1 SV=1	0	0	69628000	0	0	0	0	0	0	0	0	0	0	0	7250600	0		1.16047e+07	0	0	3625300		0	#DIV/0!		0	0	3	0	0	0	0	0	1	0	0	0	0	1	0	0
Q15020	Squamous cell carcinoma antigen recognized by T-cells 3	SART3	sp|Q15020|SART3_HUMAN Squamous cell carcinoma antigen recognized by T-cells 3 OS=Homo sapiens OX=9606 GN=SART3 PE=1 SV=1	0	0	0	0	0	0	0	0	0	0	0	0	0	0	7258400	0		0	0	0	3629200		#DIV/0!	#DIV/0!		0	0	0	0	0	0	0	0	0	0	0	0	0	1	0	0
P35030	Trypsin-3	PRSS3	sp|P35030|TRY3_HUMAN Trypsin-3 OS=Homo sapiens OX=9606 GN=PRSS3 PE=1 SV=2	0	0	0	0	0	0	0	0	0	0	0	0	0	0	7323600	0		0	0	0	3661800		#DIV/0!	#DIV/0!		0	0	0	0	0	0	0	0	0	0	0	0	0	1	0	0
P81605	Dermcidin	DCD	sp|P81605|DCD_HUMAN Dermcidin OS=Homo sapiens OX=9606 GN=DCD PE=1 SV=2	4579600	0	0	0	0	0	0	0	0	0	0	0	0	0	7764000	0		763267	0	0	3882000		0	#DIV/0!		1	0	0	0	0	0	0	0	0	0	0	0	0	1	0	0
Q15293	Reticulocalbin-1	RCN1	sp|Q15293|RCN1_HUMAN Reticulocalbin-1 OS=Homo sapiens OX=9606 GN=RCN1 PE=1 SV=1	0	0	4151300	0	0	0	0	0	0	0	0	0	0	0	8296100	0		691883	0	0	4148050		0	#DIV/0!		0	0	1	0	0	0	0	1	0	0	0	0	1	1	0	0
Q969G3	SWI/SNF-related matrix-associated actin-dependent regulator of chromatin subfamily E member 1	SMARCE1	sp|Q969G3|SMCE1_HUMAN SWI/SNF-related matrix-associated actin-dependent regulator of chromatin subfamily E member 1 OS=Homo sapiens OX=9606 GN=SMARCE1 PE=1 SV=2	0	0	0	0	0	0	0	0	0	0	0	0	0	0	8718800	0		0	0	0	4359400		#DIV/0!	#DIV/0!		0	0	0	0	0	0	0	0	0	0	0	0	0	1	0	0
P18858	DNA ligase 1	LIG1	sp|P18858|DNLI1_HUMAN DNA ligase 1 OS=Homo sapiens OX=9606 GN=LIG1 PE=1 SV=1	0	0	0	0	0	0	0	0	0	0	0	0	5138800	0	9340000	0		0	0	2569400	4670000		#DIV/0!	#DIV/0!		0	0	0	0	0	0	0	0	0	0	0	0	1	1	0	0
P16989	Y-box-binding protein 3	YBX3	sp|P16989|YBOX3_HUMAN Y-box-binding protein 3 OS=Homo sapiens OX=9606 GN=YBX3 PE=1 SV=4	0	0	0	0	0	0	0	0	0	0	0	0	0	0	0	9949700		0	0	0	4974850		#DIV/0!	#DIV/0!		0	0	1	0	0	0	0	0	1	0	0	0	0	2	0	1
Q9Y3Y2	Chromatin target of PRMT1 protein	CHTOP	sp|Q9Y3Y2|CHTOP_HUMAN Chromatin target of PRMT1 protein OS=Homo sapiens OX=9606 GN=CHTOP PE=1 SV=2	0	0	0	0	0	0	0	0	0	0	0	0	0	0	5797600	4326500		0	0	0	5062050		#DIV/0!	#DIV/0!		0	0	0	0	0	0	0	0	0	0	0	0	0	2	0	1
P33240	Cleavage stimulation factor subunit 2	CSTF2	sp|P33240|CSTF2_HUMAN Cleavage stimulation factor subunit 2 OS=Homo sapiens OX=9606 GN=CSTF2 PE=1 SV=1	0	0	0	0	0	0	0	0	0	0	0	0	0	0	10214000	0		0	0	0	5107000		#DIV/0!	#DIV/0!		0	0	0	0	0	0	0	0	0	1	0	0	1	1	1	0
Q15007	Pre-mRNA-splicing regulator WTAP	WTAP	sp|Q15007|FL2D_HUMAN Pre-mRNA-splicing regulator WTAP OS=Homo sapiens OX=9606 GN=WTAP PE=1 SV=2	0	0	0	0	0	0	0	0	0	0	0	0	3629800	0	10688000	0		0	0	1814900	5344000		#DIV/0!	#DIV/0!		0	0	0	0	0	0	0	0	0	0	0	0	1	2	1	0
Q92974	Rho guanine nucleotide exchange factor 2	ARHGEF2	sp|Q92974|ARHG2_HUMAN Rho guanine nucleotide exchange factor 2 OS=Homo sapiens OX=9606 GN=ARHGEF2 PE=1 SV=4	0	0	0	0	0	0	0	0	0	0	0	0	0	0	10772000	0		0	0	0	5386000		#DIV/0!	#DIV/0!		0	0	0	0	0	0	0	0	0	0	0	0	2	4	0	0
O95816	BAG family molecular chaperone regulator 2	BAG2	sp|O95816|BAG2_HUMAN BAG family molecular chaperone regulator 2 OS=Homo sapiens OX=9606 GN=BAG2 PE=1 SV=1	0	0	0	0	0	0	0	0	0	0	0	0	0	0	11366000	0		0	0	0	5683000		#DIV/0!	#DIV/0!		0	0	0	0	0	0	0	0	0	0	0	0	0	1	0	0
Q8TCU4	Alstrom syndrome protein 1	ALMS1	sp|Q8TCU4|ALMS1_HUMAN Alstrom syndrome protein 1 OS=Homo sapiens OX=9606 GN=ALMS1 PE=1 SV=4	0	0	0	0	0	0	0	0	0	0	0	0	0	0	15471000	0		0	0	0	7735500		#DIV/0!	#DIV/0!		0	0	0	0	0	0	0	0	0	0	0	0	0	5	0	0
Q14517	Protocadherin Fat 1	FAT1	sp|Q14517|FAT1_HUMAN Protocadherin Fat 1 OS=Homo sapiens OX=9606 GN=FAT1 PE=1 SV=2	0	0	0	0	0	0	0	0	0	0	0	0	0	0	17895000	0		0	0	0	8947500		#DIV/0!	#DIV/0!		0	0	0	0	0	0	0	0	0	0	0	0	0	2	0	0
P27797	Calreticulin	CALR	sp|P27797|CALR_HUMAN Calreticulin OS=Homo sapiens OX=9606 GN=CALR PE=1 SV=1	0	0	10965000	0	0	0	0	0	0	0	0	0	0	5308600	0	18455000		1827500	0	2654300	9227500		1.45242	#DIV/0!		0	0	2	0	1	0	1	0	0	0	0	0	0	0	1	1
P04083	Annexin A1	ANXA1	sp|P04083|ANXA1_HUMAN Annexin A1 OS=Homo sapiens OX=9606 GN=ANXA1 PE=1 SV=2	0	0	11147000	0	0	0	0	0	0	0	0	0	0	0	20174000	0		1.85783e+06	0	0	10087000		0	#DIV/0!		0	0	2	0	0	0	0	0	0	0	0	0	0	1	0	0
P61326;Q96A72	Protein mago nashi homolog	MAGOH	sp|P61326|MGN_HUMAN Protein mago nashi homolog OS=Homo sapiens OX=9606 GN=MAGOH PE=1 SV=1;sp|Q96A72|MGN2_HUMAN Protein mago nashi homolog 2 OS=Homo sapiens OX=9606 GN=MAGOHB PE=1 SV=1	0	0	0	0	0	0	0	0	0	0	0	0	0	0	27900000	0		0	0	0	13950000		#DIV/0!	#DIV/0!		0	0	0	0	0	0	0	0	0	0	0	0	0	1	0	0
Q05048	Cleavage stimulation factor subunit 1	CSTF1	sp|Q05048|CSTF1_HUMAN Cleavage stimulation factor subunit 1 OS=Homo sapiens OX=9606 GN=CSTF1 PE=1 SV=1	0	0	0	0	0	0	0	0	0	0	0	0	0	0	33231000	0		0	0	0	16615500		#DIV/0!	#DIV/0!		0	0	0	0	0	0	0	1	0	0	0	0	0	3	0	0
Q12996	Cleavage stimulation factor subunit 3	CSTF3	sp|Q12996|CSTF3_HUMAN Cleavage stimulation factor subunit 3 OS=Homo sapiens OX=9606 GN=CSTF3 PE=1 SV=1	0	0	0	0	0	0	0	0	0	0	0	0	10039000	0	55081000	0		0	0	5019500	27540500		#DIV/0!	#DIV/0!		0	1	0	1	0	0	0	0	0	0	0	0	3	3	1	0
Q92834	X-linked retinitis pigmentosa GTPase regulator	RPGR	sp|Q92834|RPGR_HUMAN X-linked retinitis pigmentosa GTPase regulator OS=Homo sapiens OX=9606 GN=RPGR PE=1 SV=2	0	89634000	0	74906000	0	0	0	0	0	0	0	0	2713400	0	368280000	82691000		2.74233e+07	0	1356700	225485500		0.0494725	#DIV/0!		0	1	0	1	0	0	0	0	0	0	0	0	1	1	0	1
P32322	Pyrroline-5-carboxylate reductase 1, mitochondrial	PYCR1	sp|P32322|P5CR1_HUMAN Pyrroline-5-carboxylate reductase 1, mitochondrial OS=Homo sapiens OX=9606 GN=PYCR1 PE=1 SV=2	0	136500000	0	50156000	0	0	0	0	3518500	0	0	0	109040000	0	551420000	28720000		3.11093e+07	586417	54520000	290070000		1.75253	494.648		0	3	0	3	0	0	0	0	0	1	0	0	5	4	3	4
P13051	Uracil-DNA glycosylase	UNG	sp|P13051|UNG_HUMAN Uracil-DNA glycosylase OS=Homo sapiens OX=9606 GN=UNG PE=1 SV=2	13905000	2454800	24132000	0	0	0	39726000	0	6425700	0	24452000	0	1855300000	3926900000	5276700000	5027400000		6.74863e+06	1.17673e+07	2891100000	5152050000		428.398	437.828		1	1	1	0	0	1	1	2	0	2	1	0	15	15	16	16
P12268;P20839	Inosine-5-monophosphate dehydrogenase 2	IMPDH2	sp|P12268|IMDH2_HUMAN Inosine-5-monophosphate dehydrogenase 2 OS=Homo sapiens OX=9606 GN=IMPDH2 PE=1 SV=2;sp|P20839|IMDH1_HUMAN Inosine-5-monophosphate dehydrogenase 1 OS=Homo sapiens OX=9606 GN=IMPDH1 PE=1 SV=2	0	0	18520000	0	0	0	0	0	0	0	0	349360	0	0	5578100	0		3.08667e+06	58226.7	0	2789050		0	47.8999		0	0	2	0	0	0	0	0	0	0	0	1	0	1	0	0
Q9UJZ1	Stomatin-like protein 2, mitochondrial	STOML2	sp|Q9UJZ1|STML2_HUMAN Stomatin-like protein 2, mitochondrial OS=Homo sapiens OX=9606 GN=STOML2 PE=1 SV=1	0	128860000	0	49789000	0	389950	95399000	0	27280000	0	0	0	362230000	511740000	1374700000	441440000		29839825	20446500	436985000	908070000		14.6444	44.412		0	5	1	4	0	1	0	5	0	4	0	0	9	8	9	7
Q86W92	Liprin-beta-1	PPFIBP1	sp|Q86W92|LIPB1_HUMAN Liprin-beta-1 OS=Homo sapiens OX=9606 GN=PPFIBP1 PE=1 SV=2	0	176020000	16779000	94234000	0	0	44519000	0	26770000	0	0	3884800	221620000	209670000	813420000	225130000		4.78388e+07	1.2529e+07	215645000	519275000		4.50774	41.446		0	9	1	3	0	0	0	4	0	3	0	1	15	14	6	6
P02545	Prelamin-A/C	LMNA	sp|P02545|LMNA_HUMAN Prelamin-A/C OS=Homo sapiens OX=9606 GN=LMNA PE=1 SV=1	1873100	4767100	102850000	34486000	3491700	0	52435000	0	0	3491700	0	9436300	186510000	8225100	789050000	22672000		2.4578e+07	1.08938e+07	97367550	405861000		3.96158	37.256		1	1	7	4	1	0	0	5	0	0	0	2	12	14	3	2
Q99623	Prohibitin-2	PHB2	sp|Q99623|PHB2_HUMAN Prohibitin-2 OS=Homo sapiens OX=9606 GN=PHB2 PE=1 SV=2	1438000	150110	0	2588400	0	0	7307000	1683200	0	0	0	0	382860	3768600	102990000	0		696085	1.49837e+06	2075730	51495000		2.98201	34.3674		1	1	0	1	0	0	0	1	1	0	0	0	2	2	1	0
P31947	14-3-3 protein sigma	SFN	sp|P31947|1433S_HUMAN 14-3-3 protein sigma OS=Homo sapiens OX=9606 GN=SFN PE=1 SV=1	2597800	0	29439000	0	0	5574000	807800	0	0	0	0	0	11991000	0	8894400	0		6.26847e+06	134633	5995500	4447200		0.956454	33.0319		1	0	4	0	0	1	0	1	0	0	0	0	3	3	0	0
P38919	Eukaryotic initiation factor 4A-III	EIF4A3	sp|P38919|IF4A3_HUMAN Eukaryotic initiation factor 4A-III OS=Homo sapiens OX=9606 GN=EIF4A3 PE=1 SV=4	0	0	10891000	0	0	0	2291000	1266800	0	0	0	0	0	0	20435000	16205000		1.81517e+06	592967	0	18320000		0	30.8955		0	0	1	0	0	0	0	1	1	0	0	0	0	2	0	2
Q8IXT5	RNA-binding protein 12B	RBM12B	sp|Q8IXT5|RB12B_HUMAN RNA-binding protein 12B OS=Homo sapiens OX=9606 GN=RBM12B PE=1 SV=2	0	8267800	0	81434000	0	659800	27537000	0	0	0	0	0	40877000	68471000	119950000	149120000		1.50603e+07	4589500	54674000	134535000		3.63035	29.3137		0	2	0	2	0	1	0	2	0	1	0	0	7	2	2	3
P07237	Protein disulfide-isomerase	P4HB	sp|P07237|PDIA1_HUMAN Protein disulfide-isomerase OS=Homo sapiens OX=9606 GN=P4HB PE=1 SV=3	0	0	67466000	0	0	0	0	0	0	0	0	1633700	0	0	12567000	0		1.12443e+07	272283	0	6283500		0	23.0771		0	0	3	0	0	0	0	0	0	0	0	1	0	1	0	0
Q96C36	Pyrroline-5-carboxylate reductase 2	PYCR2	sp|Q96C36|P5CR2_HUMAN Pyrroline-5-carboxylate reductase 2 OS=Homo sapiens OX=9606 GN=PYCR2 PE=1 SV=1	0	8785100	0	0	0	0	11758000	0	0	0	0	0	18896000	0	68888000	9755100		1.46418e+06	1.95967e+06	9448000	39321550		6.45274	20.0654		0	2	0	1	0	0	0	1	0	0	0	0	4	3	1	3
P46940	Ras GTPase-activating-like protein IQGAP1	IQGAP1	sp|P46940|IQGA1_HUMAN Ras GTPase-activating-like protein IQGAP1 OS=Homo sapiens OX=9606 GN=IQGAP1 PE=1 SV=1	0	41073000	0	43262000	0	0	69302000	0	10602000	0	0	10878000	275920000	23931000	342720000	215540000		1.40558e+07	1.51303e+07	149925500	279130000		10.6664	18.4484		0	3	0	3	0	0	1	6	0	3	0	2	17	15	3	3
P03303			sp|P03303|POLG_HRV14 Genome polyprotein OS=Human rhinovirus 14 OX=12131 PE=1 SV=3	0	0	0	219620000	0	0	37260000	0	0	0	0	0	105470000	0	173080000	42938000		3.66033e+07	6210000	52735000	108009000		1.44072	17.3928		0	0	0	1	0	0	0	1	0	0	0	0	1	1	0	1
P05141;P12235;Q9H0C2	ADP/ATP translocase 2	SLC25A5	sp|P05141|ADT2_HUMAN ADP/ATP translocase 2 OS=Homo sapiens OX=9606 GN=SLC25A5 PE=1 SV=7;sp|P12235|ADT1_HUMAN ADP/ATP translocase 1 OS=Homo sapiens OX=9606 GN=SLC25A4 PE=1 SV=4;sp|Q9H0C2|ADT4_HUMAN ADP/ATP translocase 4 OS=Homo sapiens OX=9606 GN=SLC25A31 P	0	0	82413000	0	6057900	0	0	1736800	0	6057900	0	0	2044200	0	16789000	26069000		14745150	1.29912e+06	1022100	21429000		0.0693177	16.4951		1	1	3	0	1	0	1	0	2	0	1	0	1	2	1	1
O43175	D-3-phosphoglycerate dehydrogenase	PHGDH	sp|O43175|SERA_HUMAN D-3-phosphoglycerate dehydrogenase OS=Homo sapiens OX=9606 GN=PHGDH PE=1 SV=4	0	364440000	6433700	490050000	0	0	195900000	11283000	228070000	0	0	0	780440000	466470000	1795800000	568270000		1.43487e+08	7.25422e+07	623455000	1182035000		4.34502	16.2945		0	6	2	8	0	0	1	6	1	8	0	0	11	12	10	8
P61981	14-3-3 protein gamma	YWHAG	sp|P61981|1433G_HUMAN 14-3-3 protein gamma OS=Homo sapiens OX=9606 GN=YWHAG PE=1 SV=2	0	2464600	0	0	0	0	0	0	1844800	0	0	0	0	0	9676100	0		410767	307467	0	4838050		0	15.7352		0	1	1	0	0	0	0	0	0	1	0	0	2	3	0	0
P68371;P04350	Tubulin beta-4B chain	TUBB4B	sp|P68371|TBB4B_HUMAN Tubulin beta-4B chain OS=Homo sapiens OX=9606 GN=TUBB4B PE=1 SV=1;sp|P04350|TBB4A_HUMAN Tubulin beta-4A chain OS=Homo sapiens OX=9606 GN=TUBB4A PE=1 SV=2	0	0	0	0	0	0	6180300	0	0	0	0	0	64446000	14977000	30667000	0		0	1030050	39711500	15333500		#DIV/0!	14.8862		1	2	5	3	6	1	1	3	7	6	4	2	10	3	7	4
Q969Q0;P83881	60S ribosomal protein L36a-like	RPL36AL	sp|Q969Q0|RL36L_HUMAN 60S ribosomal protein L36a-like OS=Homo sapiens OX=9606 GN=RPL36AL PE=1 SV=3;sp|P83881|RL36A_HUMAN 60S ribosomal protein L36a OS=Homo sapiens OX=9606 GN=RPL36A PE=1 SV=2	0	0	39403000	0	0	0	6723500	0	0	0	0	0	0	0	31345000	0		6.56717e+06	1.12058e+06	0	15672500		0	13.986		0	0	1	0	0	0	0	1	1	0	0	1	0	1	0	0
P35232	Prohibitin	PHB	sp|P35232|PHB_HUMAN Prohibitin OS=Homo sapiens OX=9606 GN=PHB PE=1 SV=1	0	0	0	0	0	0	0	0	13427000	0	0	0	0	6017100	37661000	23516000		0	2.23783e+06	3008550	30588500		#DIV/0!	13.6688		0	0	0	1	0	0	0	0	0	1	0	0	0	1	1	2
P12018	Immunoglobulin iota chain	VPREB1	sp|P12018|VPREB_HUMAN Immunoglobulin iota chain OS=Homo sapiens OX=9606 GN=VPREB1 PE=1 SV=2	0	0	0	8538800	0	0	42937000	0	0	0	0	0	0	33300000	164980000	0		1.42313e+06	7.15617e+06	16650000	82490000		11.6995	11.5271		0	0	0	1	0	0	0	1	0	0	0	0	1	1	1	0
P60953	Cell division control protein 42 homolog	CDC42	sp|P60953|CDC42_HUMAN Cell division control protein 42 homolog OS=Homo sapiens OX=9606 GN=CDC42 PE=1 SV=2	0	0	0	0	0	0	2699300	0	0	0	0	0	14427000	0	9691600	0		0	449883	7213500	4845800		#DIV/0!	10.7712		0	0	0	0	0	0	0	1	0	0	0	0	1	1	0	0
Q86V81	THO complex subunit 4	ALYREF	sp|Q86V81|THOC4_HUMAN THO complex subunit 4 OS=Homo sapiens OX=9606 GN=ALYREF PE=1 SV=3	0	138390000	0	38398000	0	0	31873000	0	79022000	0	0	0	287740000	117890000	240790000	154940000		2.94647e+07	18482500	202815000	197865000		6.88333	10.7055		0	5	0	2	0	0	0	3	0	4	0	0	7	4	4	4
Q6LEJ4			sp|Q6LEJ4|HEMA_I80A2 Hemagglutinin OS=Influenza A virus (strain A/Seal/Massachusetts/1/1980 H7N7) OX=384493 GN=HA PE=3 SV=1	0	377520000	0	0	0	0	0	0	6818700	0	0	0	0	15429000	0	24272000		62920000	1136450	7714500	12136000		0.122608	10.6789		0	1	0	0	0	0	0	0	0	1	0	0	0	0	1	1
Q5T8D3	Acyl-CoA-binding domain-containing protein 5	ACBD5	sp|Q5T8D3|ACBD5_HUMAN Acyl-CoA-binding domain-containing protein 5 OS=Homo sapiens OX=9606 GN=ACBD5 PE=1 SV=1	0	0	0	0	0	0	8492100	0	1576000	0	0	0	0	0	31670000	0		0	1.67802e+06	0	15835000		#DIV/0!	9.43674		0	0	0	0	0	0	0	2	0	1	0	0	1	3	0	1
P61978	Heterogeneous nuclear ribonucleoprotein K	HNRNPK	sp|P61978|HNRPK_HUMAN Heterogeneous nuclear ribonucleoprotein K OS=Homo sapiens OX=9606 GN=HNRNPK PE=1 SV=1	0	0	378660000	7278100	0	0	0	8788800	221440	0	0	0	571710	0	10983000	15800000		6.4323e+07	1.50171e+06	285855	13391500		0.00444405	8.91752		0	0	3	1	0	0	0	0	1	1	0	0	1	1	0	2
Q9UQ80	Proliferation-associated protein 2G4	PA2G4	sp|Q9UQ80|PA2G4_HUMAN Proliferation-associated protein 2G4 OS=Homo sapiens OX=9606 GN=PA2G4 PE=1 SV=3	3768200	0	17113000	0	0	0	0	0	0	0	0	2965300	0	0	8724200	0		3480200	494217	0	4362100		0	8.82629		1	0	2	0	0	0	0	0	0	0	0	1	0	1	0	0
P0DOX8;B9A064;P01709;P01706	Immunoglobulin lambda-like polypeptide 5	IGLL5	sp|P0DOX8|IGL1_HUMAN Immunoglobulin lambda-1 light chain OS=Homo sapiens OX=9606 PE=1 SV=1;sp|B9A064|IGLL5_HUMAN Immunoglobulin lambda-like polypeptide 5 OS=Homo sapiens OX=9606 GN=IGLL5 PE=2 SV=2;sp|P01709|LV208_HUMAN Immunoglobulin lambda variable 2-8 OS	0	0	0	0	0	0	35795000	0	26186000	0	0	0	0	0	172180000	0		0	1.03302e+07	0	86090000		#DIV/0!	8.33384		0	0	0	0	0	0	0	1	1	1	0	1	0	1	0	0
P05455	Lupus La protein	SSB	sp|P05455|LA_HUMAN Lupus La protein OS=Homo sapiens OX=9606 GN=SSB PE=1 SV=2	0	0	91374000	0	0	0	4263300	0	0	0	0	0	0	0	10575000	0		15229000	710550	0	5287500		0	7.44142		0	0	3	0	0	0	0	1	0	0	0	1	0	1	0	0
O60437	Periplakin	PPL	sp|O60437|PEPL_HUMAN Periplakin OS=Homo sapiens OX=9606 GN=PPL PE=1 SV=4	0	0	0	7478400	0	0	7117000	0	910400	0	0	0	5006700	8129800	10354000	9051600		1246400	1337900	6568250	9702800		5.26978	7.25226		0	0	0	1	0	0	0	1	0	1	0	0	1	1	1	1
Q9H0L4	Cleavage stimulation factor subunit 2 tau variant	CSTF2T	sp|Q9H0L4|CSTFT_HUMAN Cleavage stimulation factor subunit 2 tau variant OS=Homo sapiens OX=9606 GN=CSTF2T PE=1 SV=1	0	0	0	0	0	0	4797400	0	3696200	0	0	0	18812000	0	20112000	0		0	1415600	9406000	10056000		#DIV/0!	7.1037		0	0	0	0	0	0	0	1	0	1	0	0	3	2	1	1
Q86V48	Leucine zipper protein 1	LUZP1	sp|Q86V48|LUZP1_HUMAN Leucine zipper protein 1 OS=Homo sapiens OX=9606 GN=LUZP1 PE=1 SV=2	0	0	0	0	0	0	0	0	0	0	11428000	0	74794000	12313000	26916000	0		0	1.90467e+06	43553500	13458000		#DIV/0!	7.0658		0	0	0	0	0	0	0	1	0	0	1	0	8	5	1	0
P0DOX2;A0A0J9YX35;A0A0A0MS15;A0A0B4J1V0;A0A0B4J1V6;A0A0B4J1Y9;A0A075B6Q5;P0DP04;A0A0B4J1X8;A0A0C4DH32;P0DP03;A0A0B4J1X5;A0A0B4J1V1;P0DP02;A0A0C4DH42;P01763;P01766;P01764;P01768;P01772;P01780;P01782;P01762;P01767	Ig heavy chain V-III region WEA	IGHV3-49	sp|P0DOX2|IGA2_HUMAN Immunoglobulin alpha-2 heavy chain OS=Homo sapiens OX=9606 PE=1 SV=2;sp|A0A0J9YX35|HV64D_HUMAN Immunoglobulin heavy variable 3-64D OS=Homo sapiens OX=9606 GN=IGHV3-64D PE=3 SV=1;sp|A0A0A0MS15|HV349_HUMAN Immunoglobulin heavy variable 3	0	371860000	0	341150000	0	0	81315000	0	147140000	0	0	0	176520000	557240000	255560000	225080000		118835000	3.80758e+07	366880000	240320000		3.08731	6.31161		0	1	0	1	0	0	0	1	0	1	0	0	1	1	1	1
P60660	Myosin light polypeptide 6	MYL6	sp|P60660|MYL6_HUMAN Myosin light polypeptide 6 OS=Homo sapiens OX=9606 GN=MYL6 PE=1 SV=2	0	48359000	4973100	0	16836000	0	13574000	0	24431000	16836000	4360500	0	140630000	87242000	17681000	103030000		1.16947e+07	9.86692e+06	113936000	60355500		9.74255	6.11696		0	2	1	0	1	0	1	1	1	2	1	0	4	3	2	3
Q6UWX4	HHIP-like protein 2	HHIPL2	sp|Q6UWX4|HIPL2_HUMAN HHIP-like protein 2 OS=Homo sapiens OX=9606 GN=HHIPL2 PE=1 SV=1	0	330310000	0	320130000	0	0	256170000	0	229910000	0	0	0	296540000	406800000	418350000	567670000		1.08407e+08	8.10133e+07	351670000	493010000		3.24399	6.08554		0	1	0	1	0	0	0	1	0	1	0	0	1	1	1	1
Q9HCL3	Zinc finger protein 14 homolog	ZFP14	sp|Q9HCL3|ZFP14_HUMAN Zinc finger protein 14 homolog OS=Homo sapiens OX=9606 GN=ZFP14 PE=2 SV=2	0	0	0	0	0	0	49786000	0	16101000	0	0	0	223400000	88192000	128150000	0		0	1.09812e+07	155796000	64075000		#DIV/0!	5.83499		0	0	0	0	0	0	0	1	0	1	0	0	1	1	1	0
Q86U42	Polyadenylate-binding protein 2	PABPN1	sp|Q86U42|PABP2_HUMAN Polyadenylate-binding protein 2 OS=Homo sapiens OX=9606 GN=PABPN1 PE=1 SV=3	0	0	5411500	0	11811000	0	0	1023500	1096000	11811000	900500	1607300	1122800	7244800	11269000	17321000		2.87042e+06	2.73972e+06	4183800	14295000		1.45756	5.21769		0	1	1	0	1	0	1	1	1	1	1	1	1	1	1	1
P06454	Prothymosin alpha	PTMA	sp|P06454|PTMA_HUMAN Prothymosin alpha OS=Homo sapiens OX=9606 GN=PTMA PE=1 SV=2	2581300	3180600	6338700	0	23722000	0	0	0	0	23722000	10784000	0	0	10153000	0	53663000		5.97043e+06	5751000	5076500	26831500		0.850273	4.66554		1	1	1	0	1	0	0	0	0	0	1	0	0	0	1	1
Q9P0L2	Serine/threonine-protein kinase MARK1	MARK1	sp|Q9P0L2|MARK1_HUMAN Serine/threonine-protein kinase MARK1 OS=Homo sapiens OX=9606 GN=MARK1 PE=1 SV=2	0	271390000	0	192120000	0	0	0	0	97021000	0	0	0	0	156390000	0	146250000		7.72517e+07	1.61702e+07	78195000	73125000		1.01221	4.52222		0	1	0	1	0	0	1	0	0	1	0	0	0	0	1	1
P15814;A0M8Q6;P0CF74	Immunoglobulin lambda-like polypeptide 1	IGLL1	sp|P15814|IGLL1_HUMAN Immunoglobulin lambda-like polypeptide 1 OS=Homo sapiens OX=9606 GN=IGLL1 PE=1 SV=1;sp|A0M8Q6|IGLC7_HUMAN Immunoglobulin lambda constant 7 OS=Homo sapiens OX=9606 GN=IGLC7 PE=1 SV=3;sp|P0CF74|IGLC6_HUMAN Immunoglobulin lambda constant	0	0	0	84846	0	0	70845000	0	0	0	0	0	34098000	65057000	33424000	72246000		14141	11807500	49577500	52835000		3505.94	4.4747		0	0	0	1	0	0	0	1	0	0	0	0	1	1	1	1
P0C0L4;P0C0L5	Complement C4-A	C4A	sp|P0C0L4|CO4A_HUMAN Complement C4-A OS=Homo sapiens OX=9606 GN=C4A PE=1 SV=2;sp|P0C0L5|CO4B_HUMAN Complement C4-B OS=Homo sapiens OX=9606 GN=C4B PE=1 SV=2	0	26431000	0	0	1279100	0	81634000	0	19574000	1279100	0	0	86914000	102300000	139480000	0		4618350	1.70812e+07	94607000	69740000		20.485	4.08286		0	2	0	0	1	0	0	1	0	1	0	0	3	2	1	0
P22061	Protein-L-isoaspartate(D-aspartate) O-methyltransferase	PCMT1	sp|P22061|PIMT_HUMAN Protein-L-isoaspartate(D-aspartate) O-methyltransferase OS=Homo sapiens OX=9606 GN=PCMT1 PE=1 SV=4	13243000	0	9547700	0	0	0	8572200	6904300	6945900	0	0	0	17371000	0	26264000	0		3798450	3.73707e+06	8685500	13132000		2.28659	3.51399		1	0	1	0	0	0	0	1	1	1	0	0	2	2	0	0
P25398	40S ribosomal protein S12	RPS12	sp|P25398|RS12_HUMAN 40S ribosomal protein S12 OS=Homo sapiens OX=9606 GN=RPS12 PE=1 SV=3	0	0	7711600	0	0	0	0	9424200	0	0	0	0	14777000	0	11011000	0		1.28527e+06	1570700	7388500	5505500		5.74861	3.50513		0	0	1	0	0	0	0	0	1	0	0	0	1	1	0	0
P0DP25;P0DP24;P0DP23			sp|P0DP25|CALM3_HUMAN Calmodulin-3 OS=Homo sapiens OX=9606 GN=CALM3 PE=1 SV=1;sp|P0DP24|CALM2_HUMAN Calmodulin-2 OS=Homo sapiens OX=9606 GN=CALM2 PE=1 SV=1;sp|P0DP23|CALM1_HUMAN Calmodulin-1 OS=Homo sapiens OX=9606 GN=CALM1 PE=1 SV=1	0	0	26255000	0	0	1564300	0	1631400	0	0	0	0	0	0	0	1881900		4636550	271900	0	940950		0	3.46065		1	1	2	1	1	2	1	1	2	1	1	1	1	1	1	2
P63104	14-3-3 protein zeta/delta	YWHAZ	sp|P63104|1433Z_HUMAN 14-3-3 protein zeta/delta OS=Homo sapiens OX=9606 GN=YWHAZ PE=1 SV=1	16321000	3834700	352900000	10153000	22720000	306510000	7032900	0	0	22720000	4632300	22851000	8639800	21184000	40062000	25683000		1.1874e+08	9.53937e+06	14911900	32872500		0.125585	3.44598		1	1	7	1	1	1	0	2	1	0	1	1	3	1	2	2
P11021	78 kDa glucose-regulated protein	HSPA5	sp|P11021|BIP_HUMAN Endoplasmic reticulum chaperone BiP OS=Homo sapiens OX=9606 GN=HSPA5 PE=1 SV=2	0	0	192320000	0	25997000	0	19377000	35238000	0	25997000	0	30133000	38222000	0	120650000	0		3.63862e+07	18457500	19111000	60325000		0.525227	3.26832		0	0	8	0	3	0	0	4	4	1	1	4	7	5	0	0
P27283			sp|P27283|POLN_SINDO Non-structural polyprotein OS=Sindbis virus subtype Ockelbo (strain Edsbyn 82-5) OX=31699 PE=2 SV=1	522830000	102660000	91748000	47553000	243090000	432230000	95189000	88010000	77884000	243090000	353640000	0	746640000	153710000	769380000	88047000		240018500	1.42969e+08	450175000	428713500		1.87558	2.99865		1	1	1	1	1	1	1	1	1	1	1	0	1	1	1	1
P63244	Guanine nucleotide-binding protein subunit beta-2-like 1	GNB2L1	sp|P63244|RACK1_HUMAN Receptor of activated protein C kinase 1 OS=Homo sapiens OX=9606 GN=RACK1 PE=1 SV=3	0	0	35297000	0	5370900	0	0	0	0	5370900	0	0	0	3637300	0	4972400		6.77798e+06	895150	1818650	2486200		0.268317	2.77741		0	0	1	0	1	0	1	0	0	0	1	0	0	0	1	1
P28799	Granulins	GRN	sp|P28799|GRN_HUMAN Granulins OS=Homo sapiens OX=9606 GN=GRN PE=1 SV=2	230380000	297450000	160940000	183340000	144790000	210760000	282330000	0	0	144790000	226150000	21979000	64068000	363490000	299930000	322680000		204610000	112541500	213779000	311305000		1.04481	2.76614		2	1	2	1	1	1	1	1	1	1	1	2	1	2	1	1
P62826	GTP-binding nuclear protein Ran	RAN	sp|P62826|RAN_HUMAN GTP-binding nuclear protein Ran OS=Homo sapiens OX=9606 GN=RAN PE=1 SV=3	0	0	235290000	0	0	0	0	0	0	0	0	12921000	0	0	11407000	0		39215000	2153500	0	5703500		0	2.64848		0	1	4	0	1	0	1	0	1	1	1	1	0	1	1	1
P23526	Adenosylhomocysteinase	AHCY	sp|P23526|SAHH_HUMAN Adenosylhomocysteinase OS=Homo sapiens OX=9606 GN=AHCY PE=1 SV=4	9786200	0	37336000	0	0	0	0	3686300	0	0	0	0	9168000	0	3087300	0		7853700	614383	4584000	1543650		0.583674	2.51252		1	0	1	0	0	0	0	0	1	0	0	0	1	1	0	0
P22234	Multifunctional protein ADE2	PAICS	sp|P22234|PUR6_HUMAN Multifunctional protein ADE2 OS=Homo sapiens OX=9606 GN=PAICS PE=1 SV=3	0	0	15257000	8374300	14548000	0	0	1656800	2738700	14548000	0	0	0	0	1721000	14108000		6.36322e+06	3157250	0	7914500		0	2.50677		0	0	2	1	1	0	0	0	1	1	0	1	0	1	0	1
Q15056	Eukaryotic translation initiation factor 4H	EIF4H	sp|Q15056|IF4H_HUMAN Eukaryotic translation initiation factor 4H OS=Homo sapiens OX=9606 GN=EIF4H PE=1 SV=5	0	0	0	0	2964400	0	0	0	1324700	2964400	0	0	0	0	0	2897700		494067	714850	0	1448850		0	2.02679		0	0	0	0	1	0	1	0	0	1	0	0	0	0	0	1
P07942	Laminin subunit beta-1	LAMB1	sp|P07942|LAMB1_HUMAN Laminin subunit beta-1 OS=Homo sapiens OX=9606 GN=LAMB1 PE=1 SV=2	11230000000	4790700000	12158000000	5534600000	26456000000	8935200000	54833000	12700000000	4789100000	26456000000	18740000000	428920000	15725000000	8432100000	33681000000	8777900000		1.15174e+10	1.05281e+10	12078550000	21229450000		1.04872	2.01645		1	1	1	1	1	1	1	1	1	1	1	1	1	1	1	1
P22626	Heterogeneous nuclear ribonucleoproteins A2/B1	HNRNPA2B1	sp|P22626|ROA2_HUMAN Heterogeneous nuclear ribonucleoproteins A2/B1 OS=Homo sapiens OX=9606 GN=HNRNPA2B1 PE=1 SV=2	19064000	0	134410000	4249800	0	0	2991100	36176000	18606000	0	0	7508300	14471000	0	43601000	0		26287300	1.08802e+07	7235500	21800500		0.275247	2.00368		1	1	2	1	0	1	0	1	2	3	1	2	2	2	1	1
